# Supplementary material for: EcoDragons: A Game for Environmental Education and Public Outreach
Source: MDPI journal article supplement (doi:10.3390/insects12090776), 2021-08-29
Supplement: s1 [file s1]

## Supplementary material: Appendix 1

**Khelifa R. & Mahdjoub H. (2021).** EcoDragons: a game for environmental education and public outreach. *Insects*

# Gameplay example

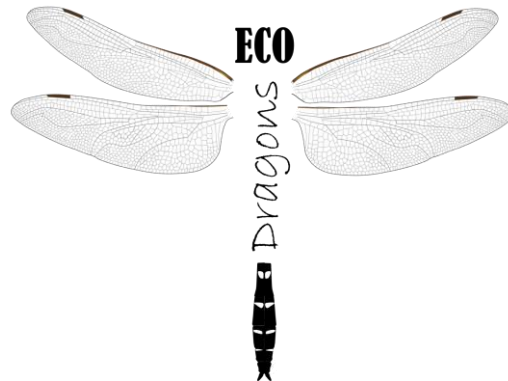

Player 1

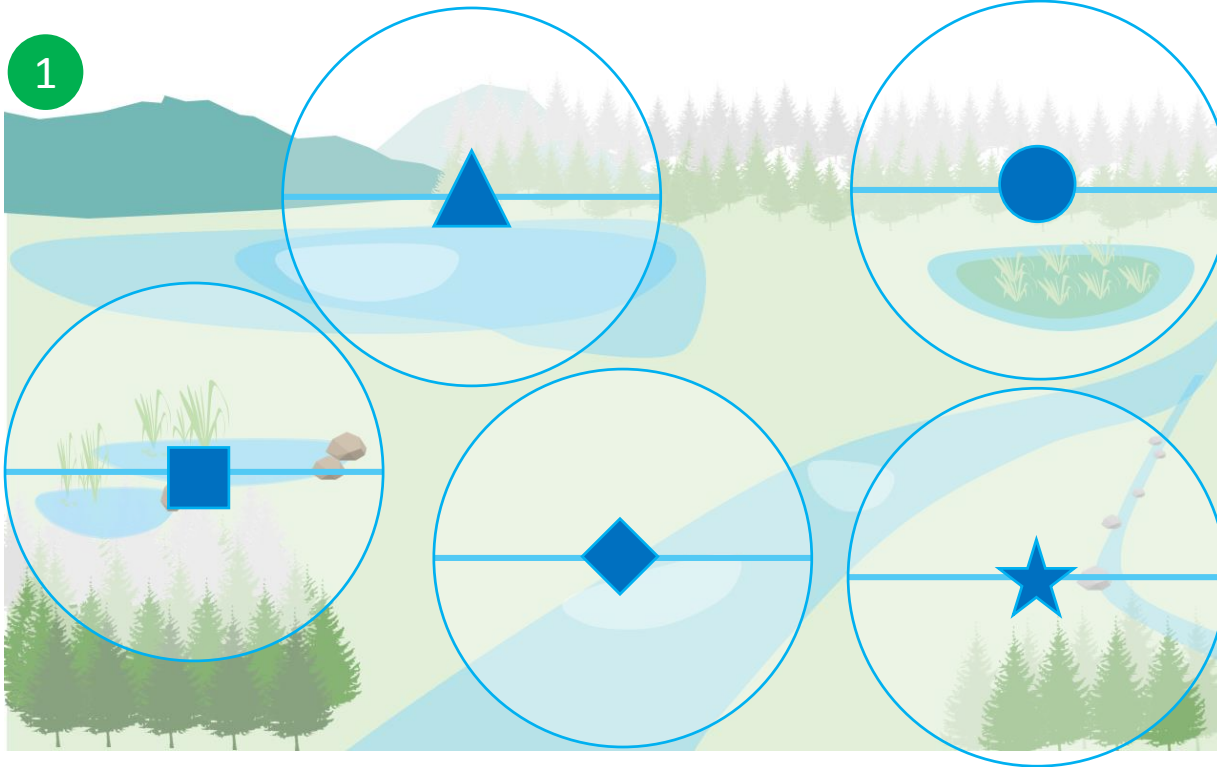

Player 2

Habitat  
occupied

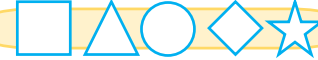

2

0

Disturbances  
solved

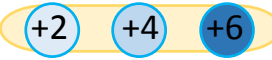

3

0

0

0

Conservation  
priority

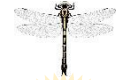

4

0

## Gameplay

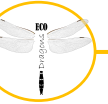

- 1 The game starts with five habitats, three decks of cards, and a die.
- 2 The score for habitat occupied, environmental disturbances solved, and conservation priority are shown for each player.
- 3 Environmental disturbances have three levels (mild, strong and severe) and players are rewarded accordingly
- 4 Conservation priority score is the sum of priorities of all species occupying a habitat

Dragonfly

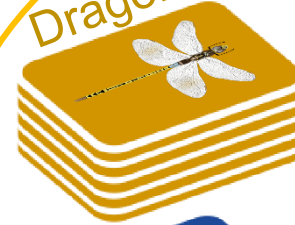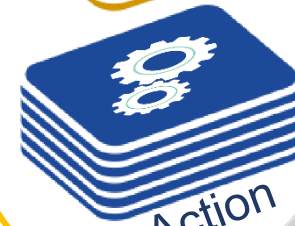

Action

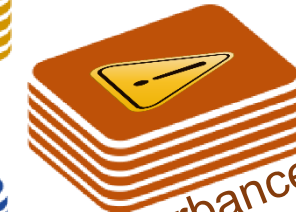

Disturbance

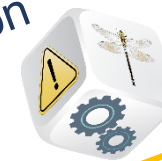

Habitat  
occupied

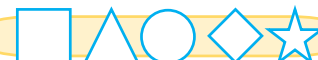

2

0

Disturbances  
solved

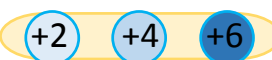

3

0

0

0

Conservation  
priority

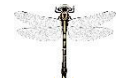

4

0

Player 1

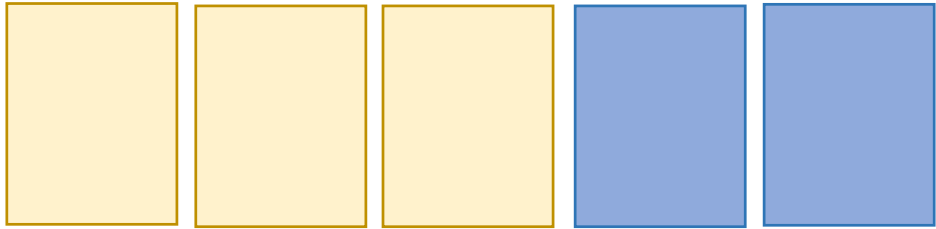

1

Habitat occupied

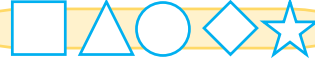

0

Disturbances solved

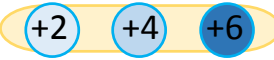

0 0 0

Conservation priority

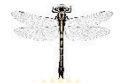

0

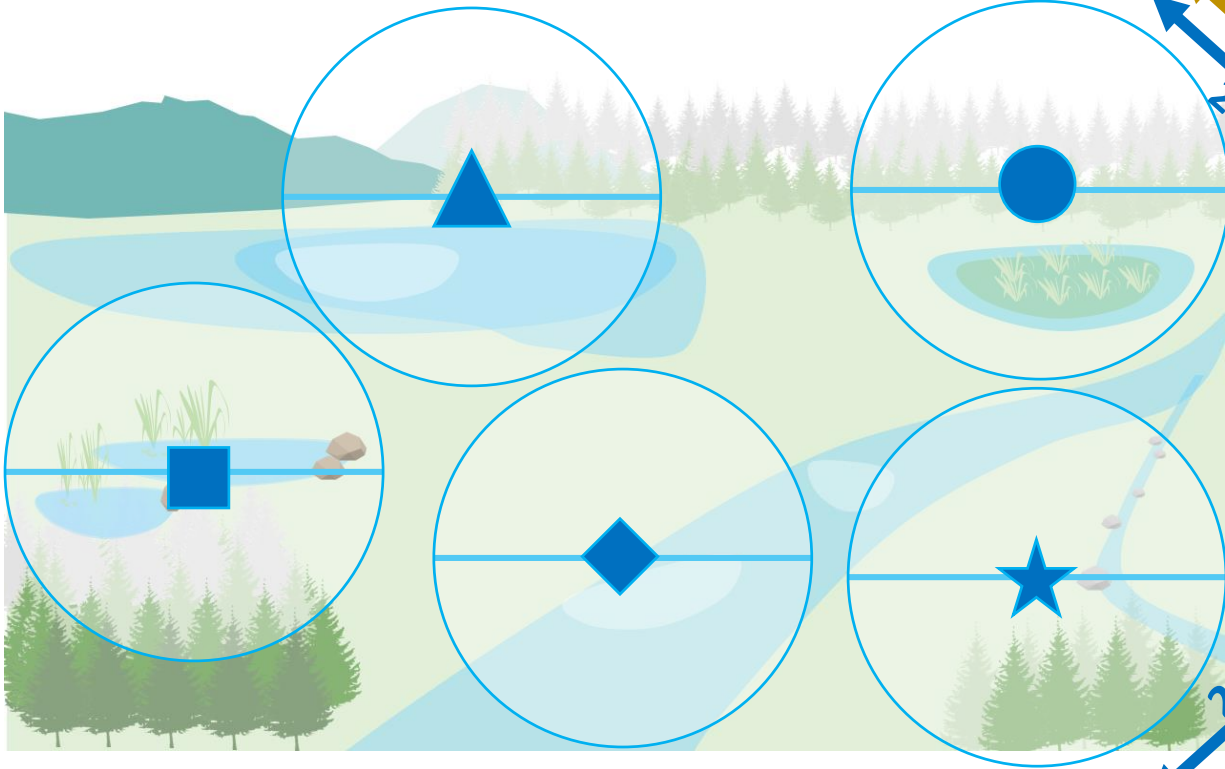

3 cards

2 cards

Dragonfly

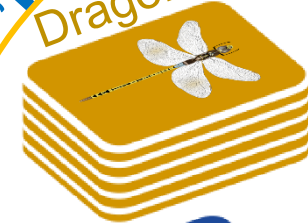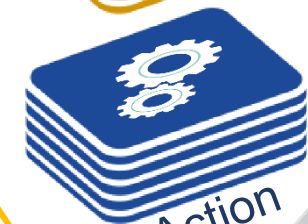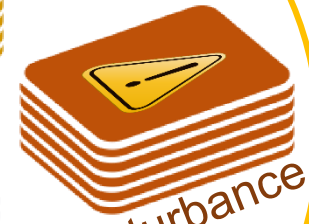

Disturbance

Action

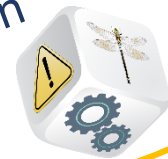

2 cards

3 cards

Habitat occupied

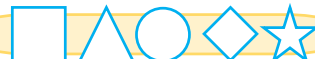

0

Disturbances solved

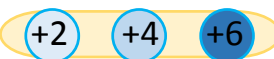

0 0 0

Conservation priority

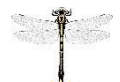

0

Player 2

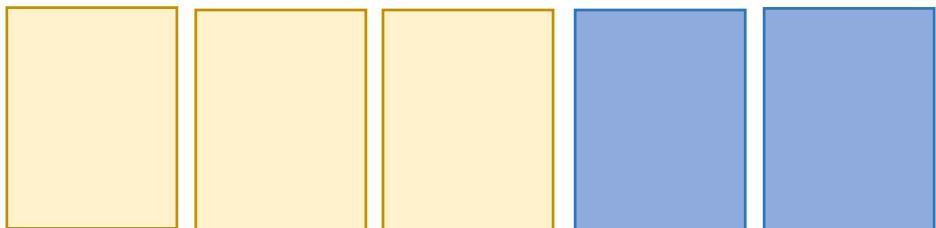

1

## Gameplay

- 1 After shuffling the decks, five cards are drawn for each player at the start of the game: three dragonfly cards and two action cards

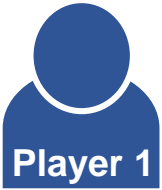

Player 1

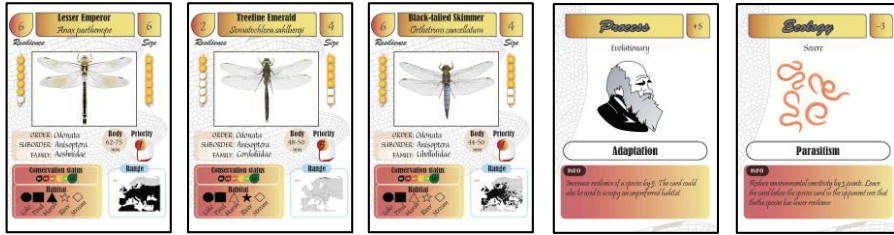

1

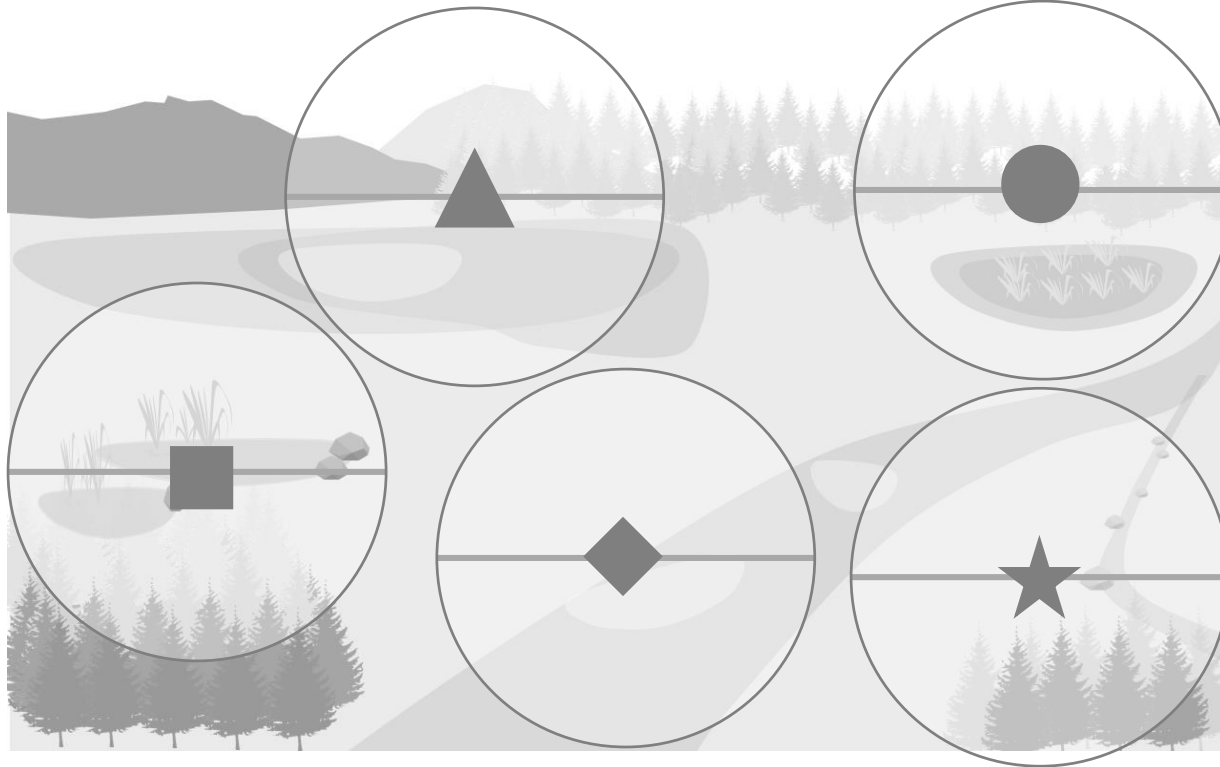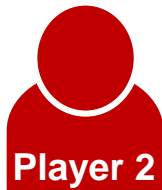

Player 2

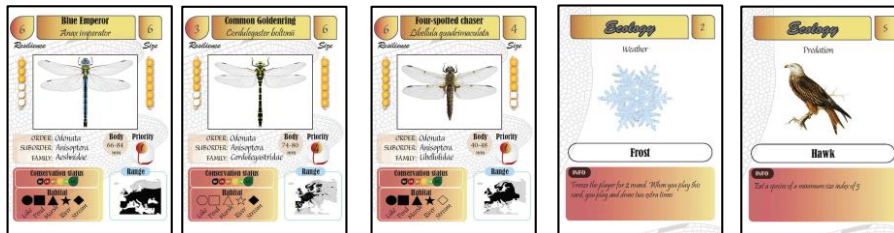

1

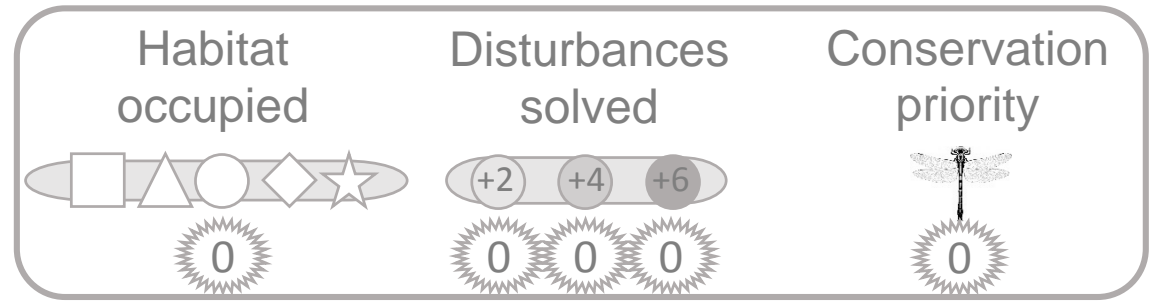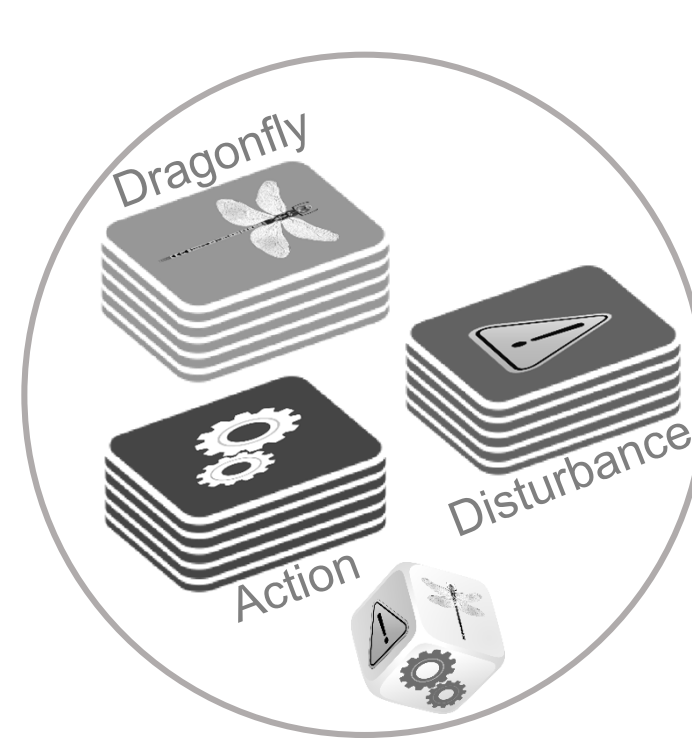

**Gameplay**

1 Each player has five cards (three dragonfly cards and two action cards)

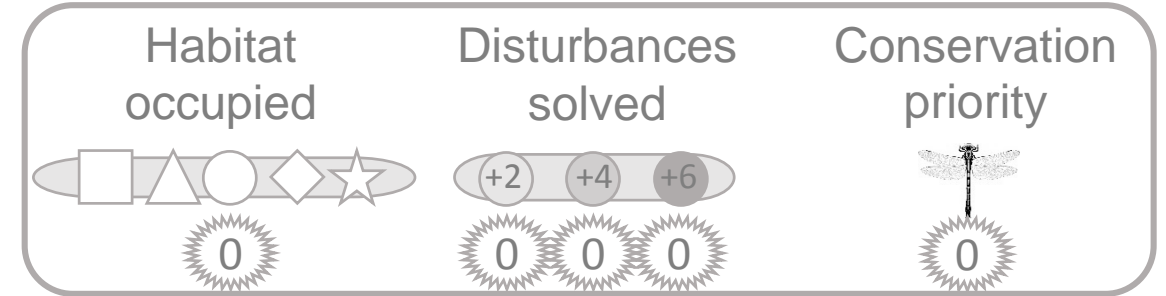

Player 1

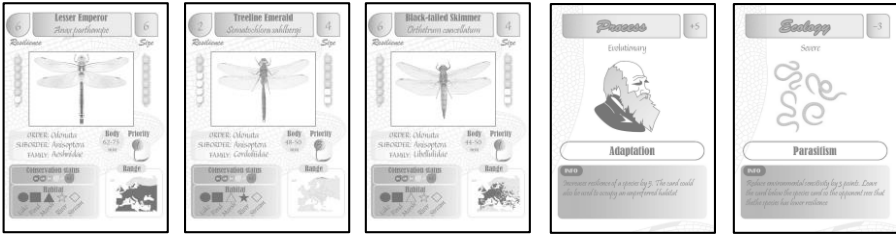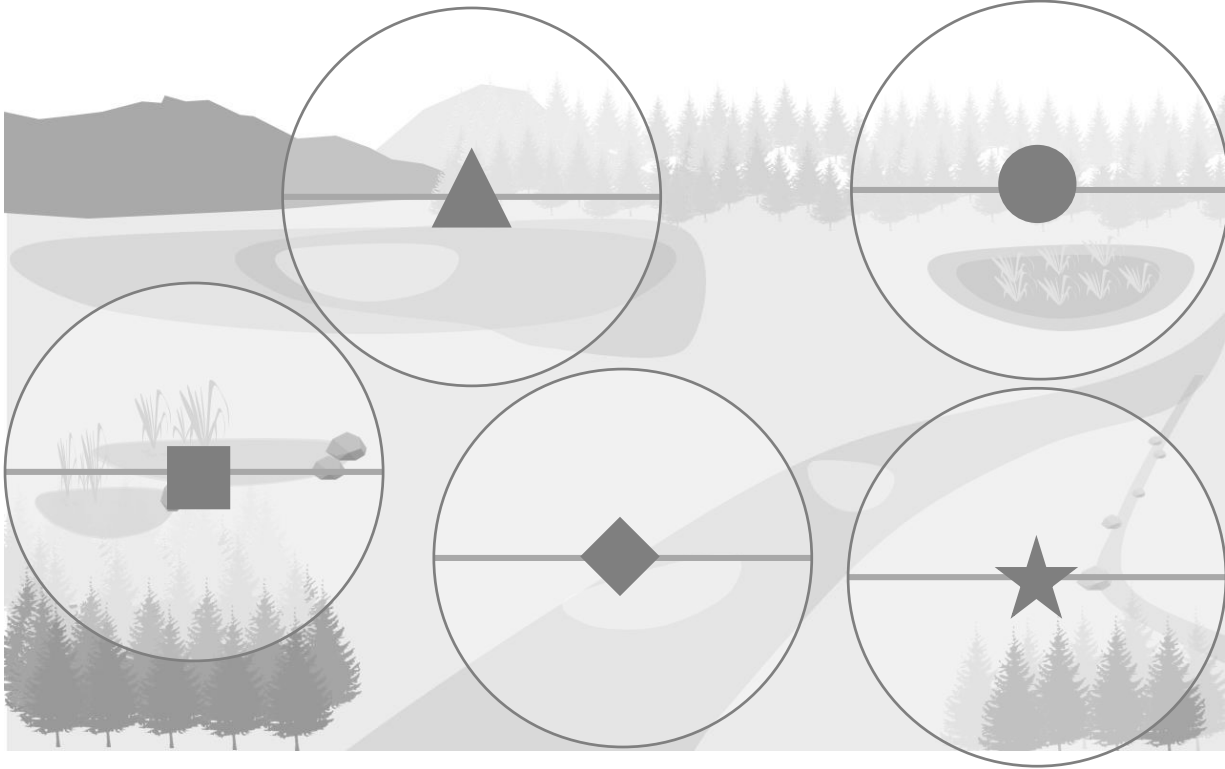

Player 2

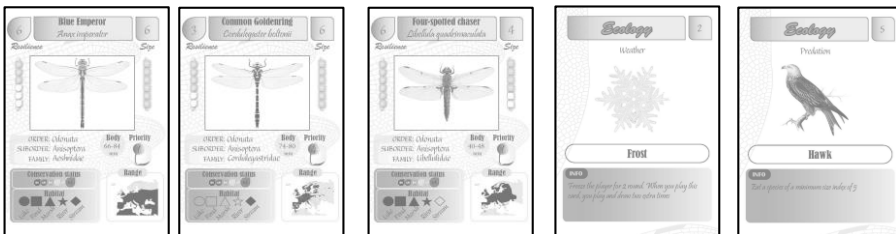

Habitat occupied

0

Disturbances solved

0 0 0

Conservation priority

0

**Dragonfly**

**Action**

**Disturbance**

1

**Gameplay**

- Each player draws a card then plays a card (or pass)
- Before drawing a card, the die has to be rolled to determine which deck should be drawn (dragonfly, action, or disturbance)

Here, the roll of die resulted in a dragonfly logo, which means that Player 1 has to draw a dragonfly card

Habitat occupied

0

Disturbances solved

0 0 0

Conservation priority

0

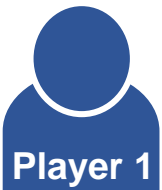

Player 1

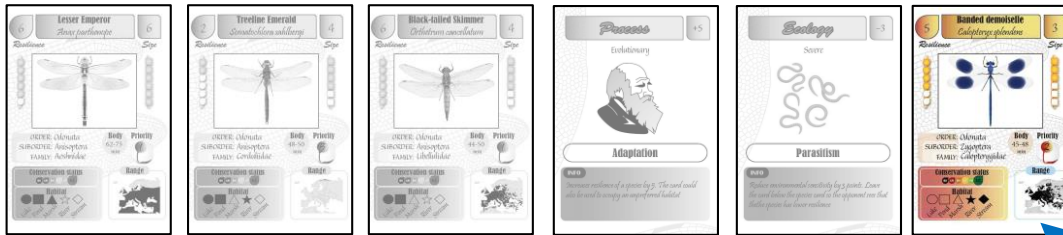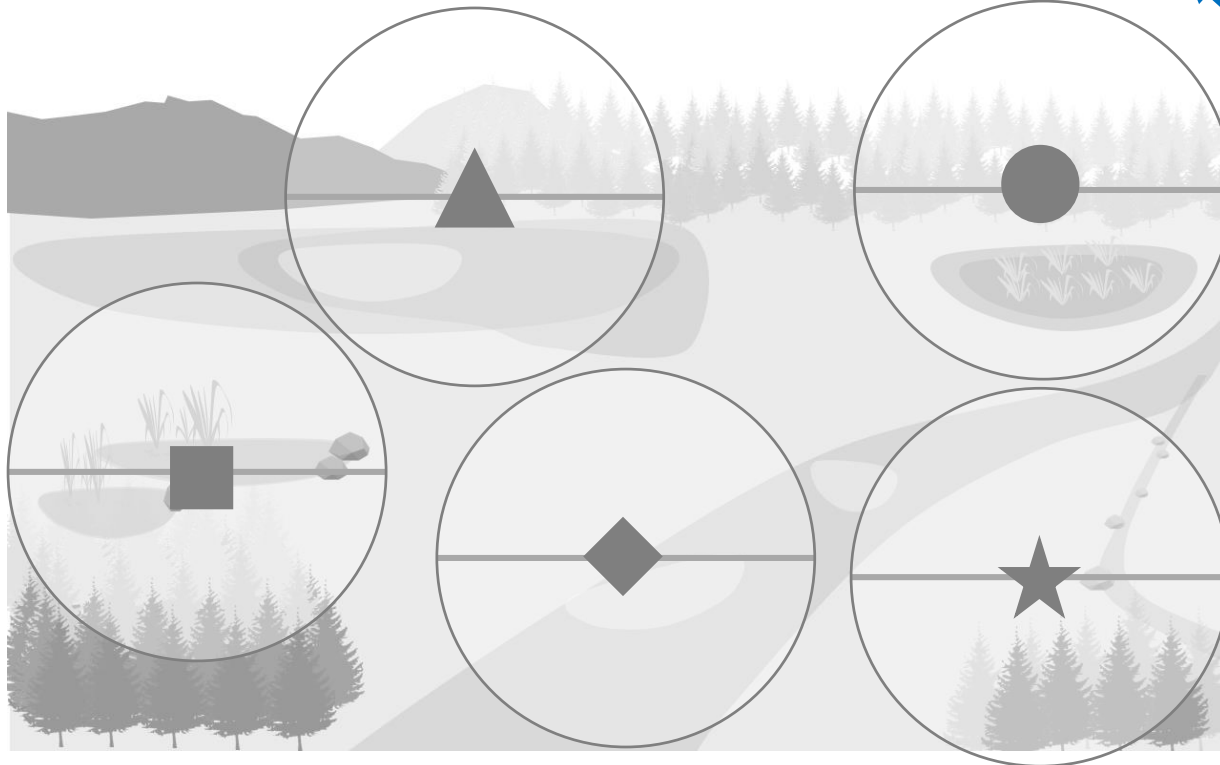

Habitat occupied

Disturbances solved

Conservation priority

Dragonfly

Action

Disturbance

Gameplay

1

Player 1 draws a dragonfly card

Player 1 obtained the 'Banded Demoiselle'

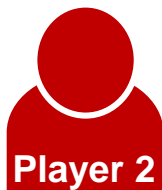

Player 2

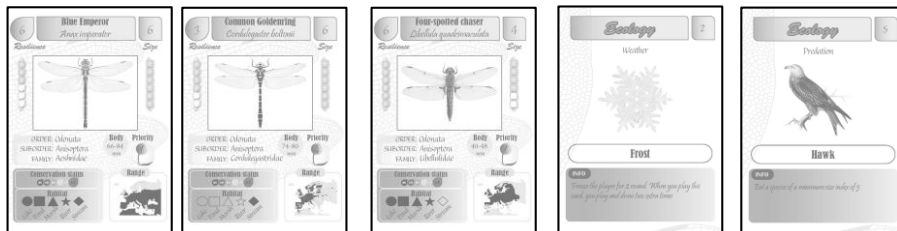

Habitat occupied

Disturbances solved

Conservation priority

Player 1

Lesser Emperor

Score: 6

Treedie Emerald

Score: 4

Black-tailed Skimmer

Score: 4

Ponzo

Score: 15

Sooty

Score: 3

Bandied demimite

Score: 3

1

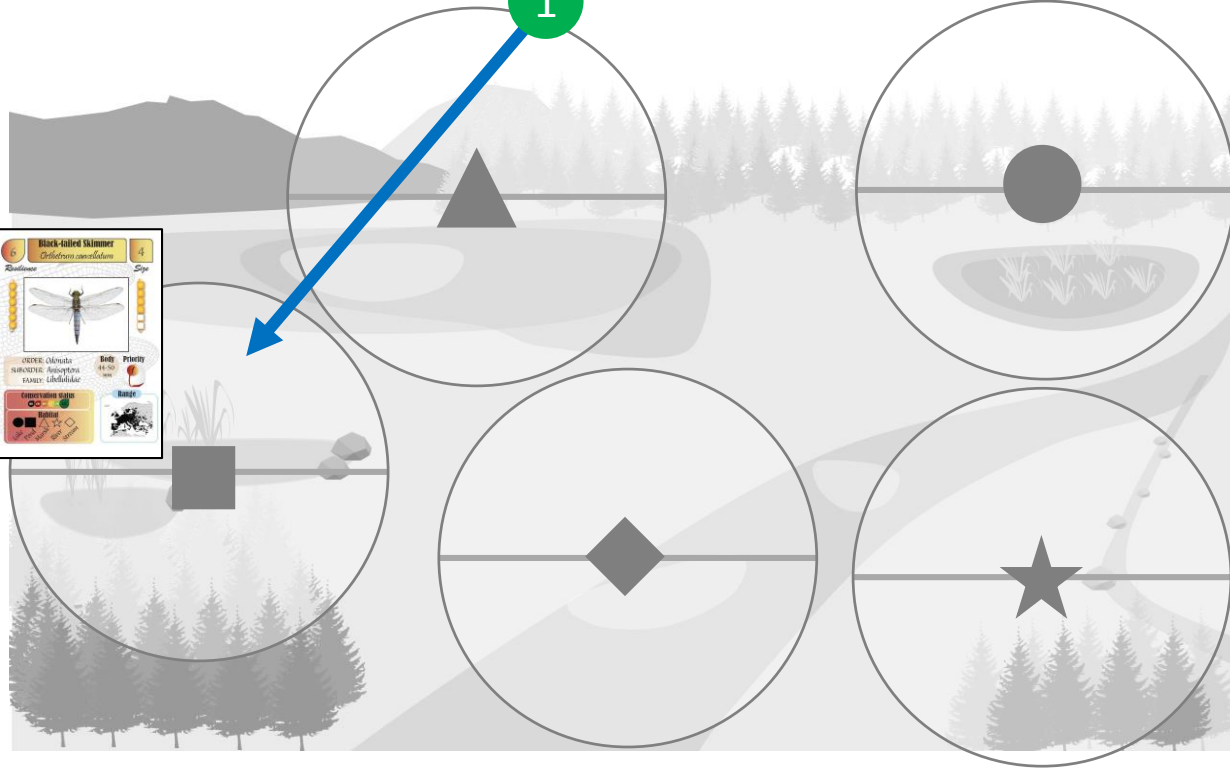

Player 2

Blue Emperor

Score: 6

Common Goldenwing

Score: 6

Four-spotted chaser

Score: 4

Sooty

Score: 2

Sooty

Score: 5

Habitat occupied

1

Disturbances solved

0 0 0

Conservation priority

1

Dragonfly

1

Player 1 plays one card (or could pass)

- Here, Player 1 placed a dragonfly (Black-tailed Skimmer) in the square habitat

Habitat occupied

0

Disturbances solved

0 0 0

Conservation priority

0

Player 1

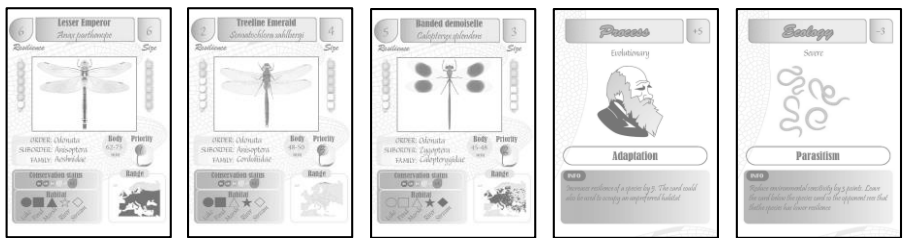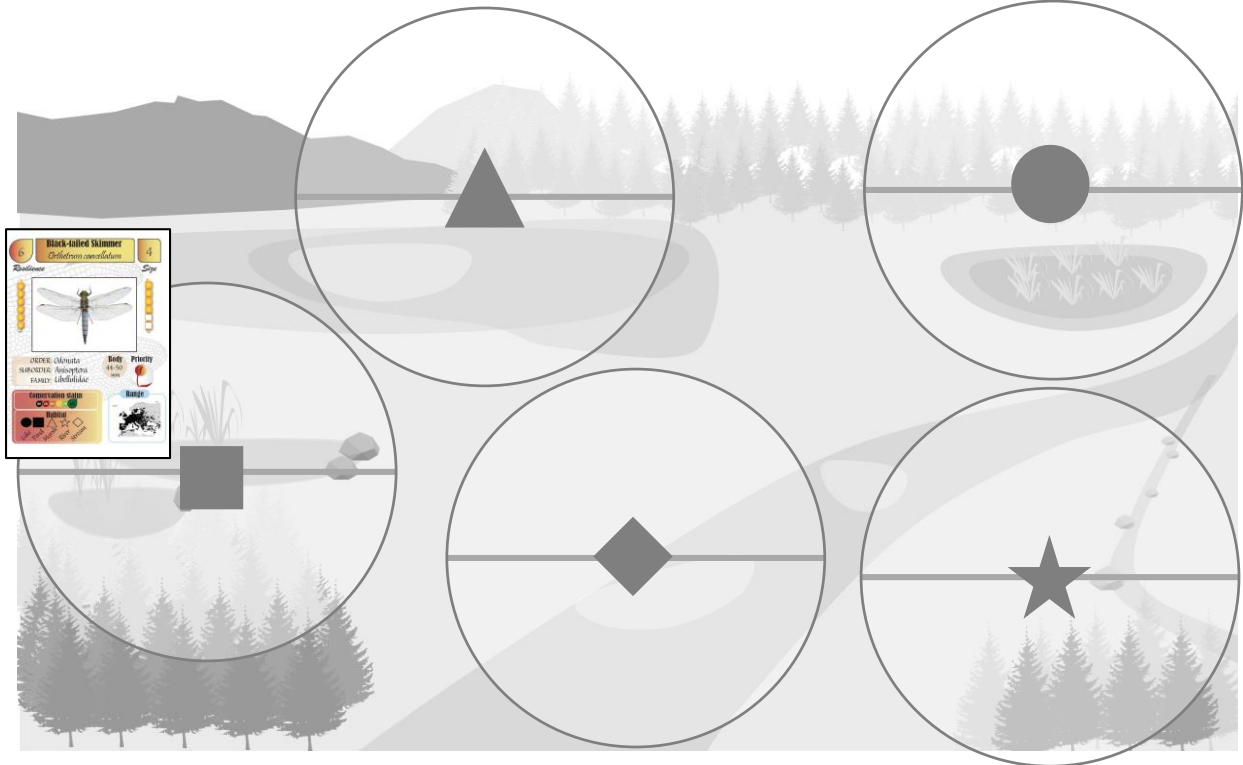

Player 2

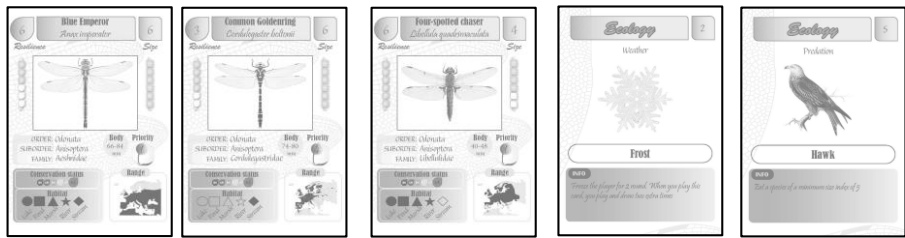

Habitat occupied

1

Disturbances solved

0 0 0

Conservation priority

1

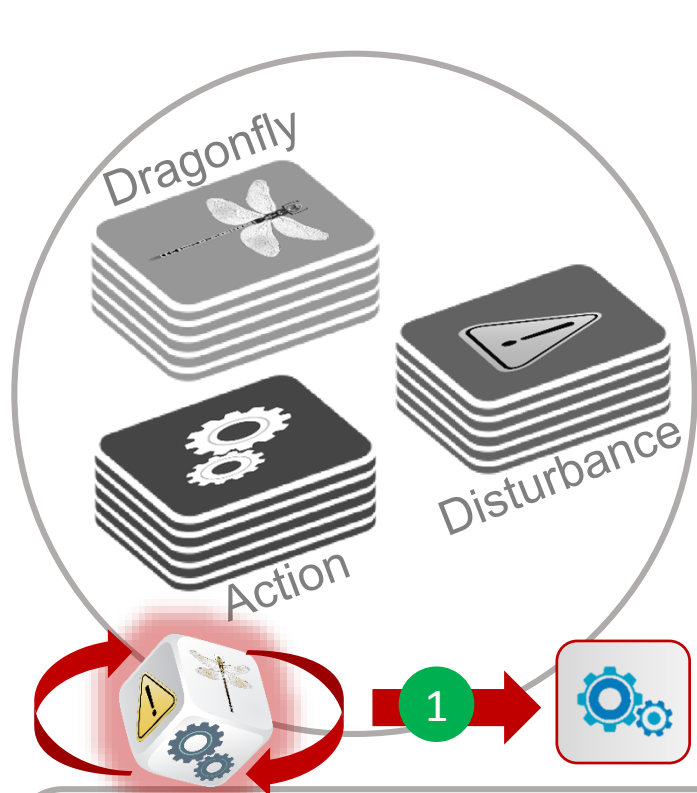

### Gameplay

1 Same as Player 1, Player 2 rolls a die first.

- Here, Player 2 has to draw an action card.

Habitat occupied

0

Disturbances solved

0 0 0

Conservation priority

0

Player 1

Lesser Emperor  
*Anax junius*

Body: 10  
Priority: 1

Interactions: none

Treeline Emerald  
*Amantia californica*

Body: 10  
Priority: 1

Interactions: none

Banded demoiselle  
*Zygoptera glaucula*

Body: 10  
Priority: 1

Interactions: none

Pondskater  
*Eurostus*

Body: 10  
Priority: 1

Interactions: none

Sooty  
*Libellula*

Body: 10  
Priority: 1

Interactions: none

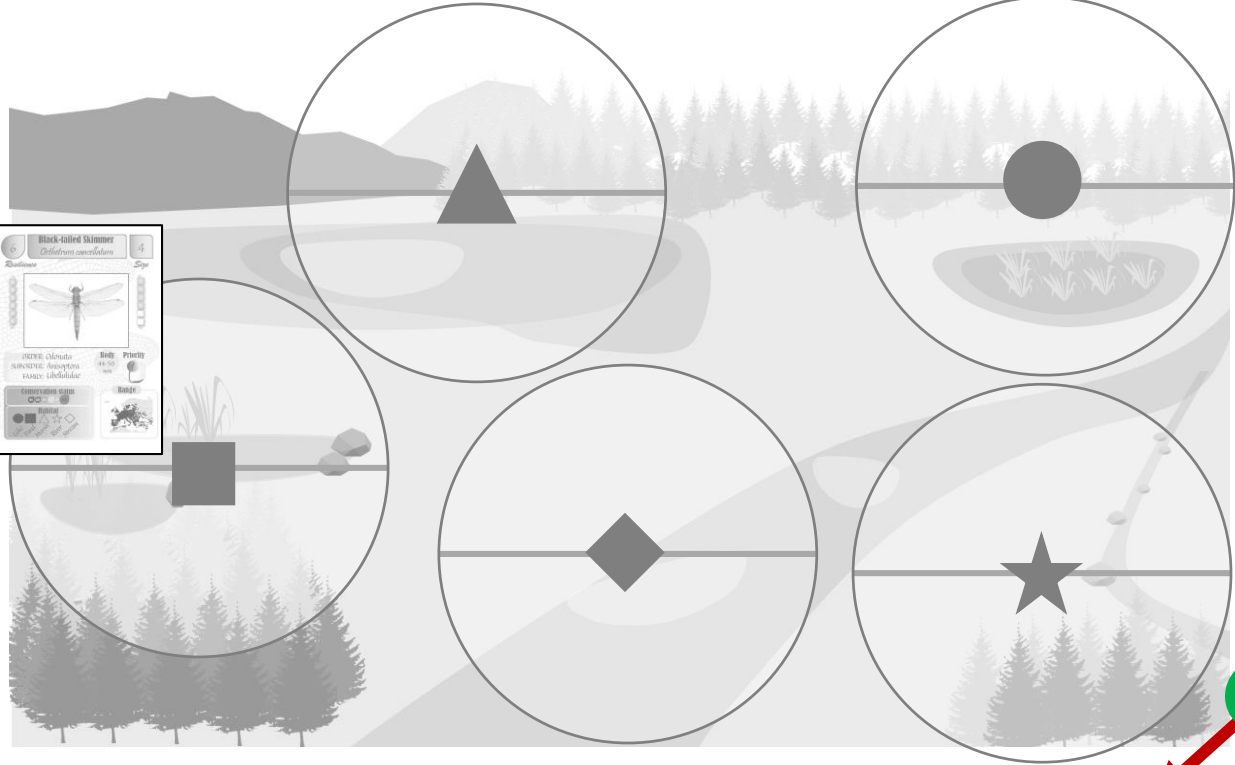

Habitat occupied

1

Disturbances solved

0 +2 +4 +6

Conservation priority

1

Player 2

Blue Emperor  
*Anax junius*

Body: 10  
Priority: 1

Interactions: none

Common Goldenwing  
*Libellula borealis*

Body: 10  
Priority: 1

Interactions: none

Four-spotted chaser  
*Libellula quadrimaculata*

Body: 10  
Priority: 1

Interactions: none

Sooty  
*Libellula*

Body: 10  
Priority: 1

Interactions: none

Sooty  
*Libellula*

Body: 10  
Priority: 1

Interactions: none

Sooty  
*Libellula*

Body: 10  
Priority: 1

Interactions: none

Habitat occupied

0

Disturbances solved

0 +2 +4 +6

Conservation priority

0

Dragonfly

Action

Disturbance

Gameplay

1 Player 2 draws one action card

- Player 2 received a mutualism card

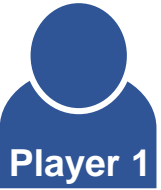

Player 1

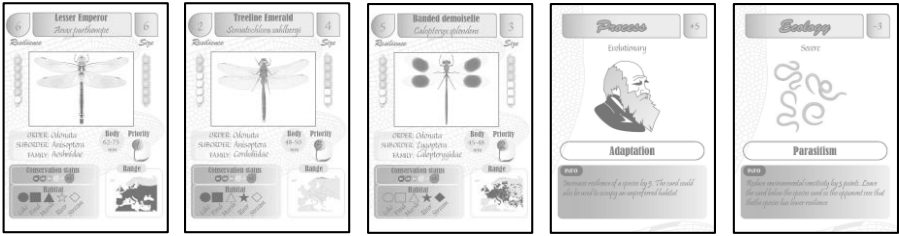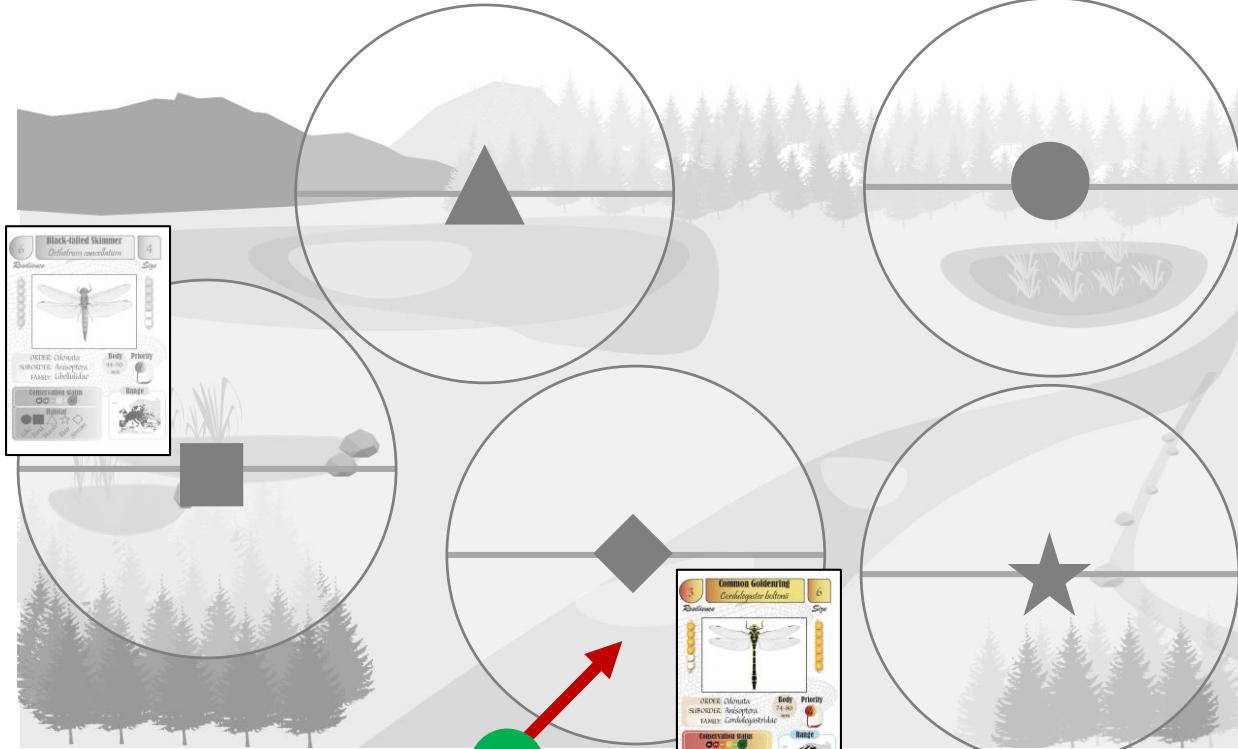

1

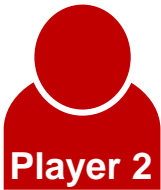

Player 2

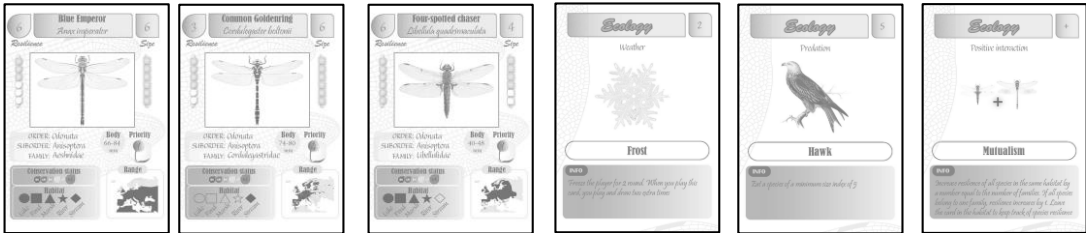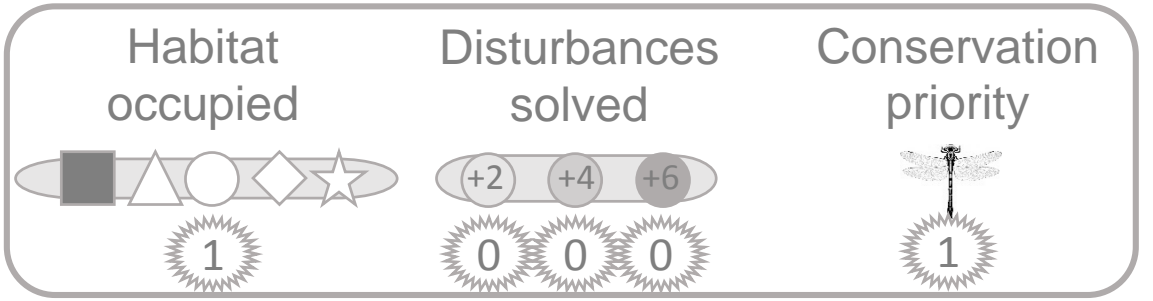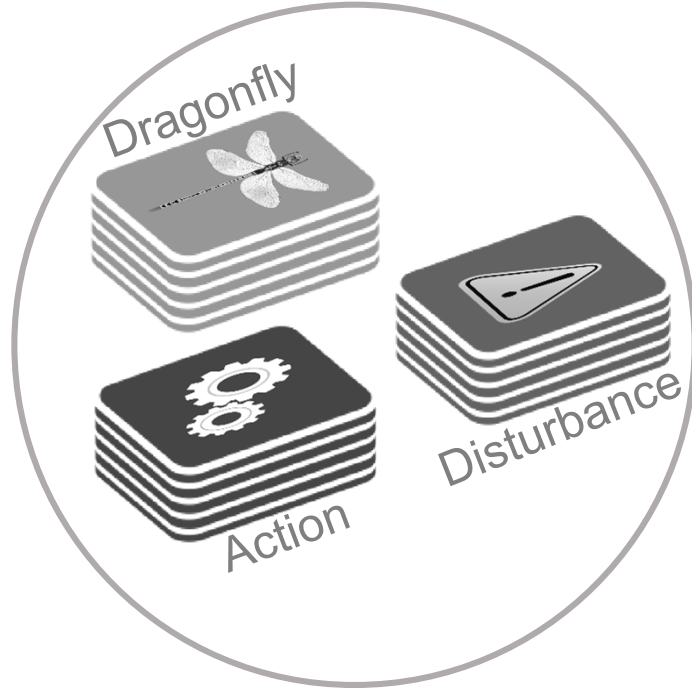

## Gameplay

- 1 Player 2 plays one card  
Here, Player 2 placed a dragonfly (Common Goldenring) in the diamond habitat

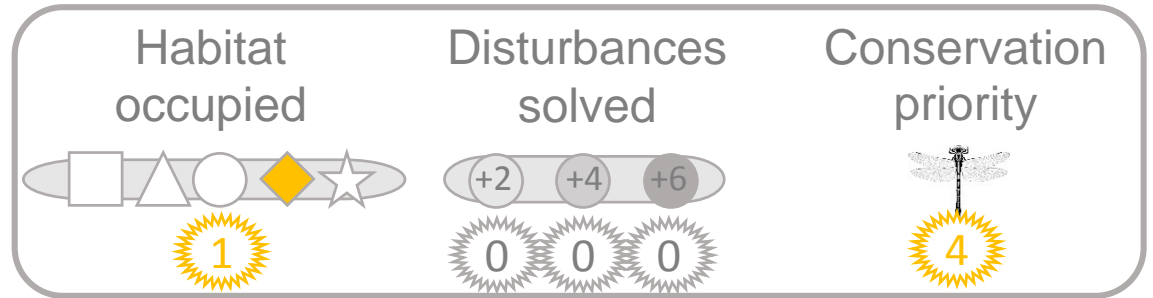

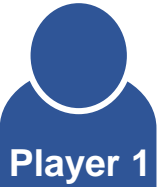

Player 1

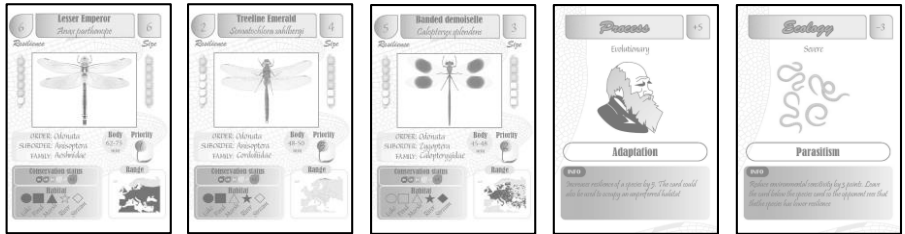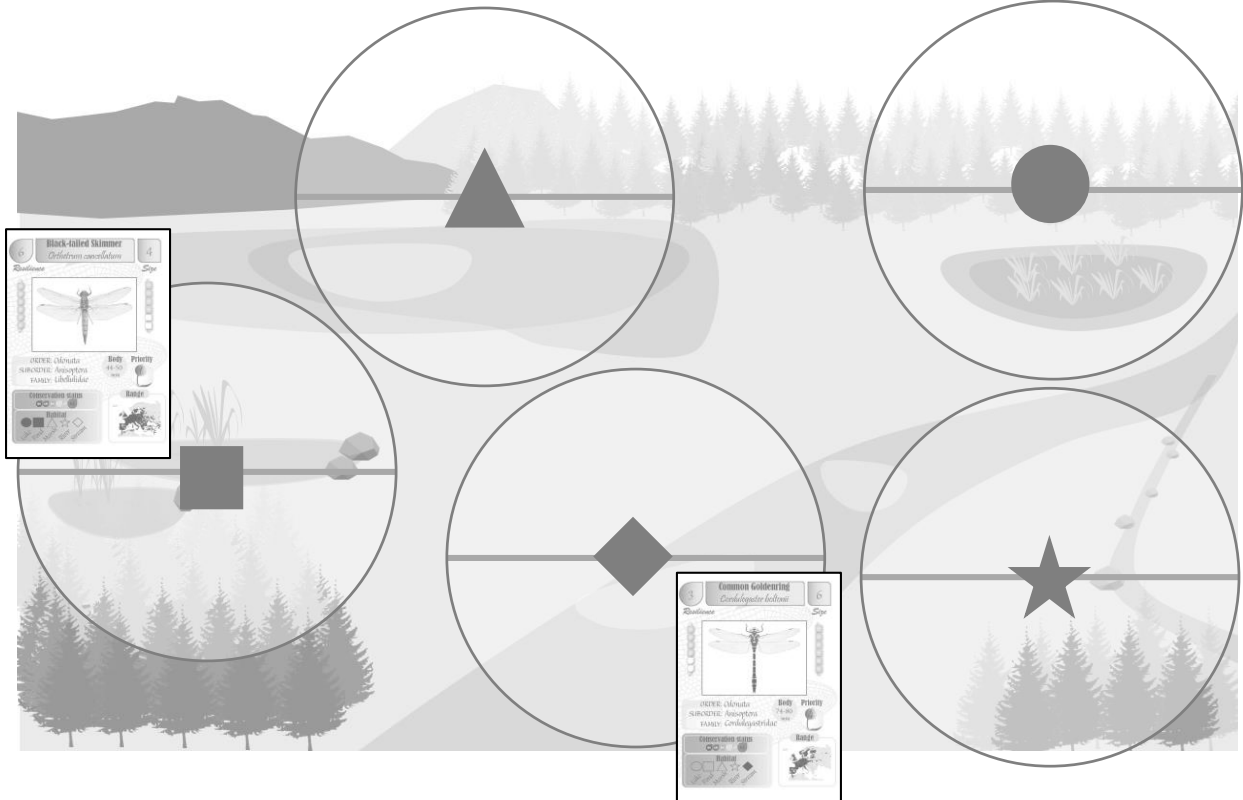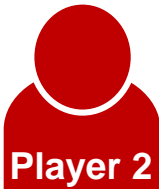

Player 2

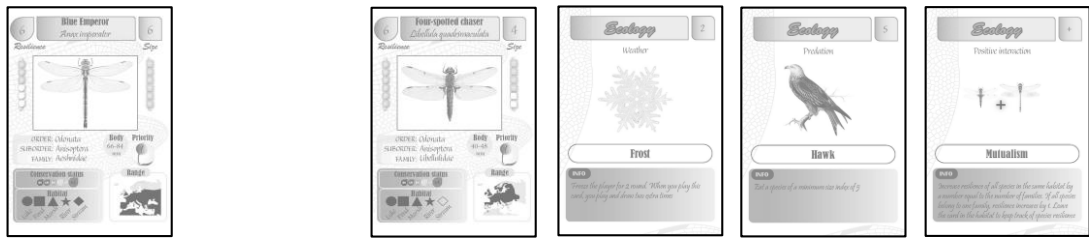

Habitat occupied

1

Disturbances solved

0 0 0

Conservation priority

1

Dragonfly

Action

Disturbance

1

Gameplay

1 Player 1 tosses the die and obtains an action card

Habitat occupied

1

Disturbances solved

0 0 0

Conservation priority

4

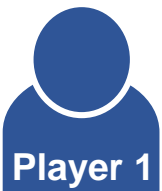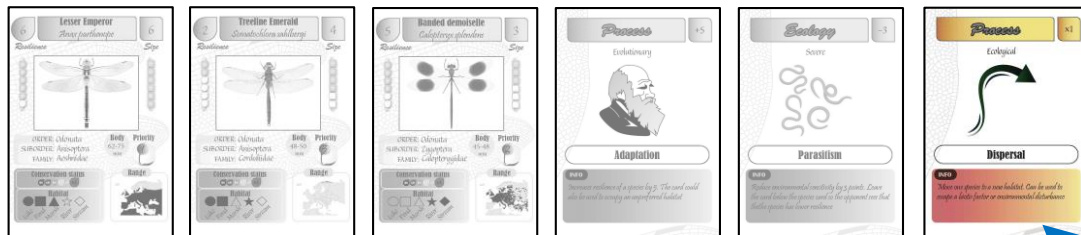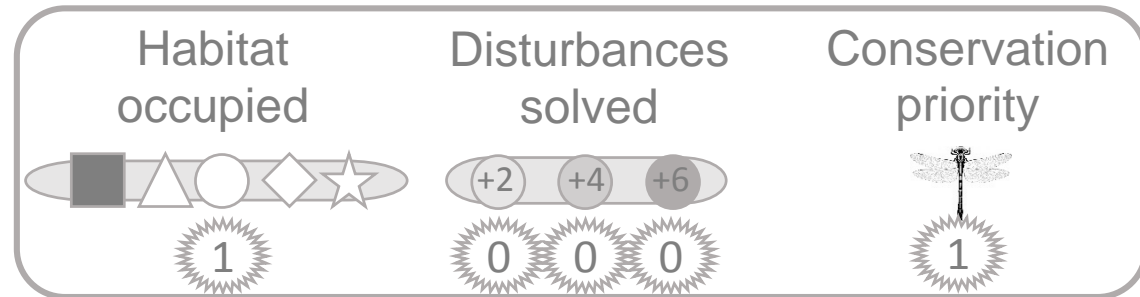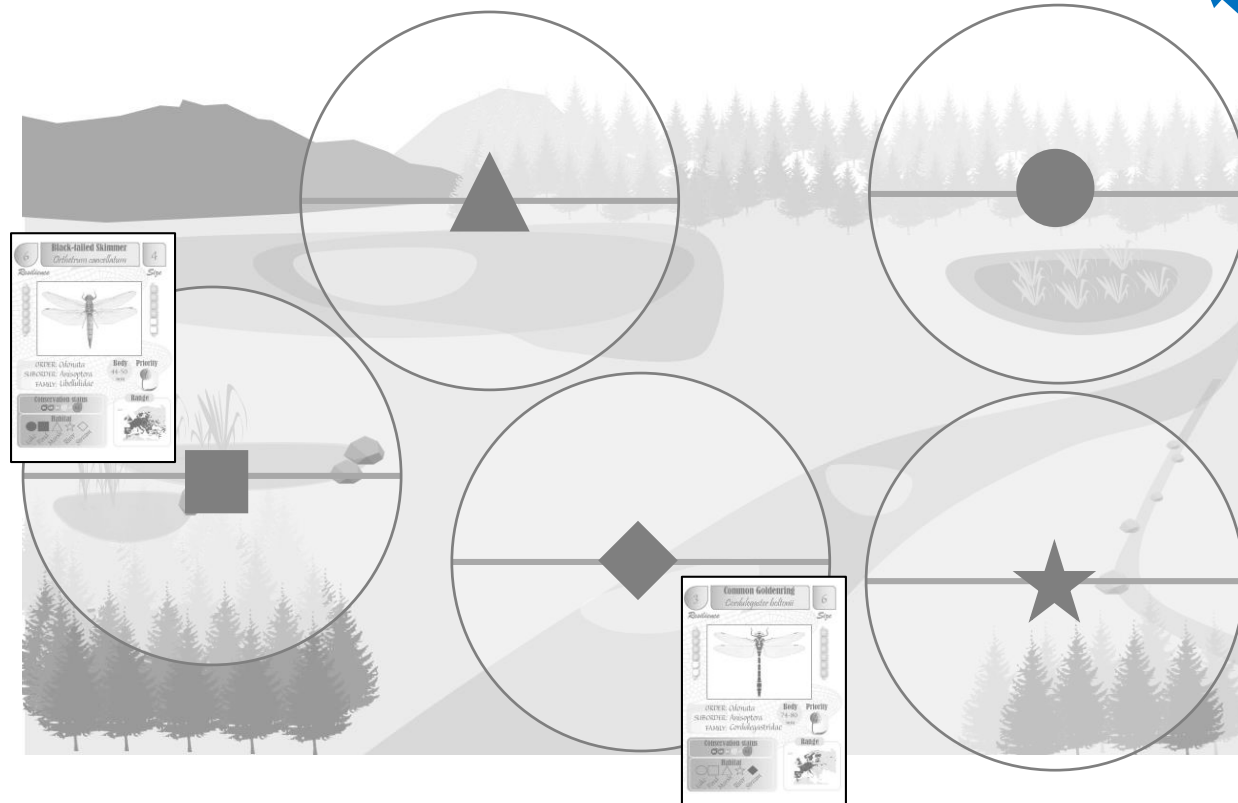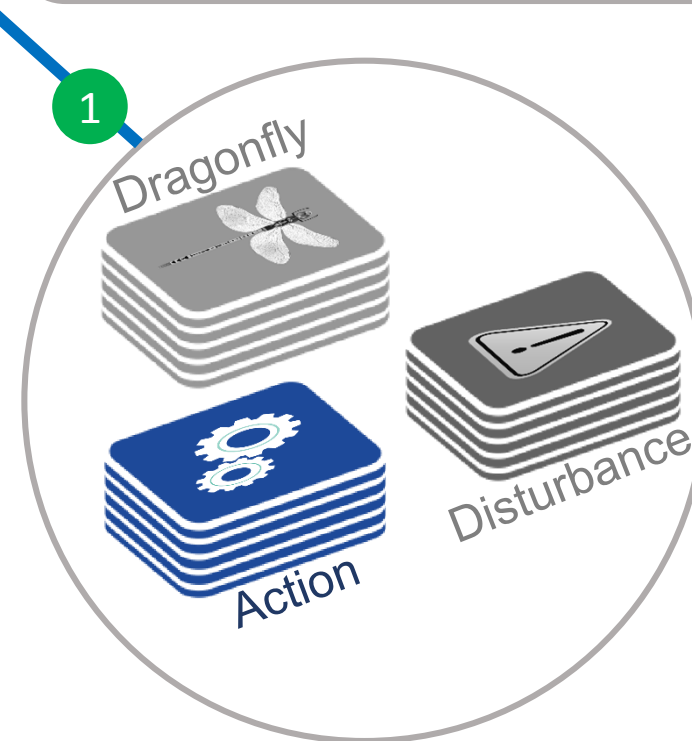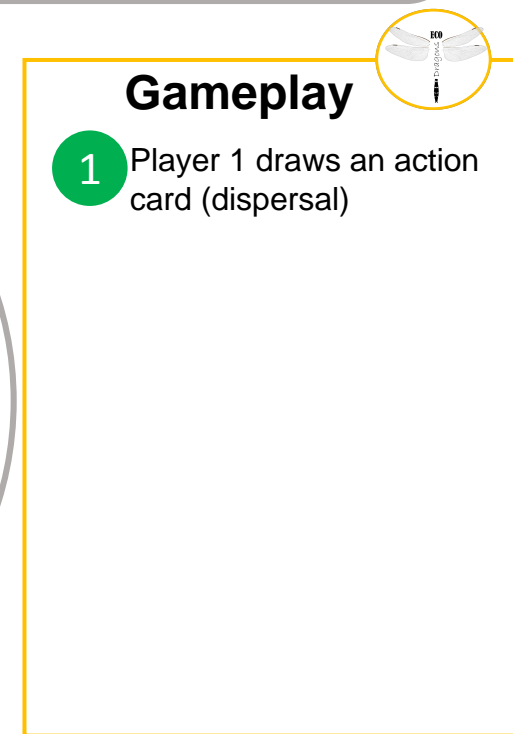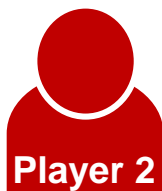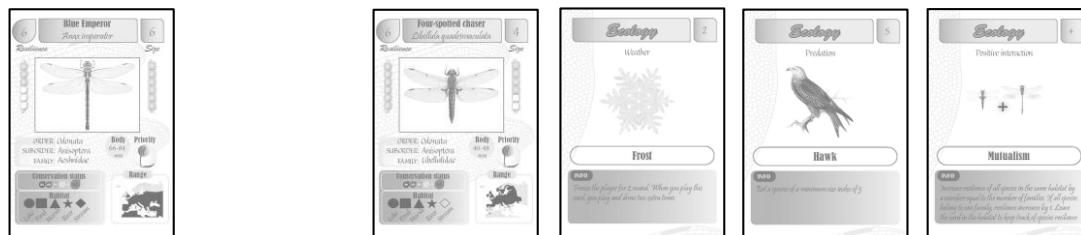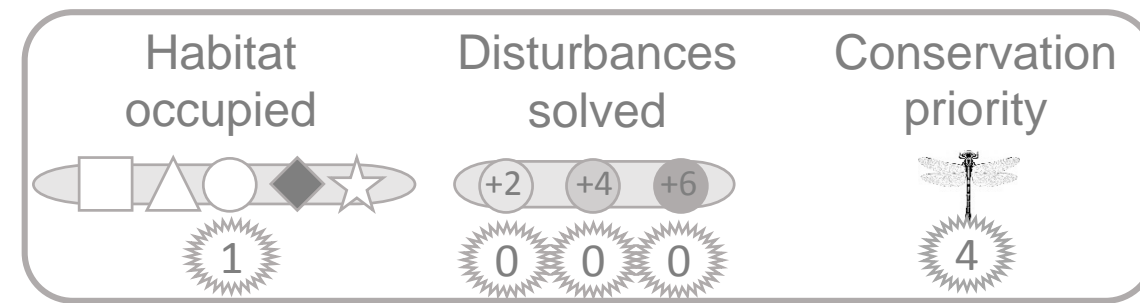

Player 1

Lesser Emperor  
*Anax junius*  
6

Treedie Emerald  
*Desmoulinia viridis*  
4

Banded demoiselle  
*Calopteryx glauconia*  
3

Pondweed  
Evolutionary  
15

Sooty  
Scare  
-3

Pondweed  
Ecological  
x1

Black-tailed Skimmer  
*Pseudocoreoperla carolinensis*  
4

Banded demoiselle  
*Calopteryx glauconia*  
3

Common Goldenbelly  
*Coloburiscus bellus*  
6

1

Triangle

Circle

Diamond

Star

Player 2

Blue Emperor  
*Anax junius*  
6

Four-spotted chaser  
*Libellula quadrimaculata*  
4

Sooty  
Weather  
2

Sooty  
Predation  
5

Sooty  
Positive interaction  
1

Habitat occupied

Disturbances solved

Conservation priority

2

+2

+4

+6

0

0

0

3

Dragonfly

Action

Disturbance

1

Player 1 places a dragonfly card (banded demoiselle) in the star habitat

Habitat occupied

Disturbances solved

Conservation priority

1

+2

+4

+6

0

0

0

4

Player 1

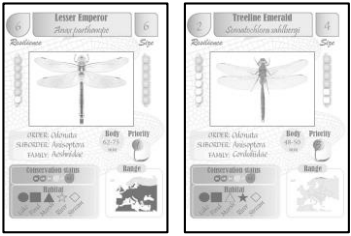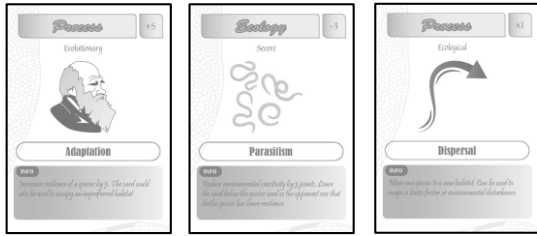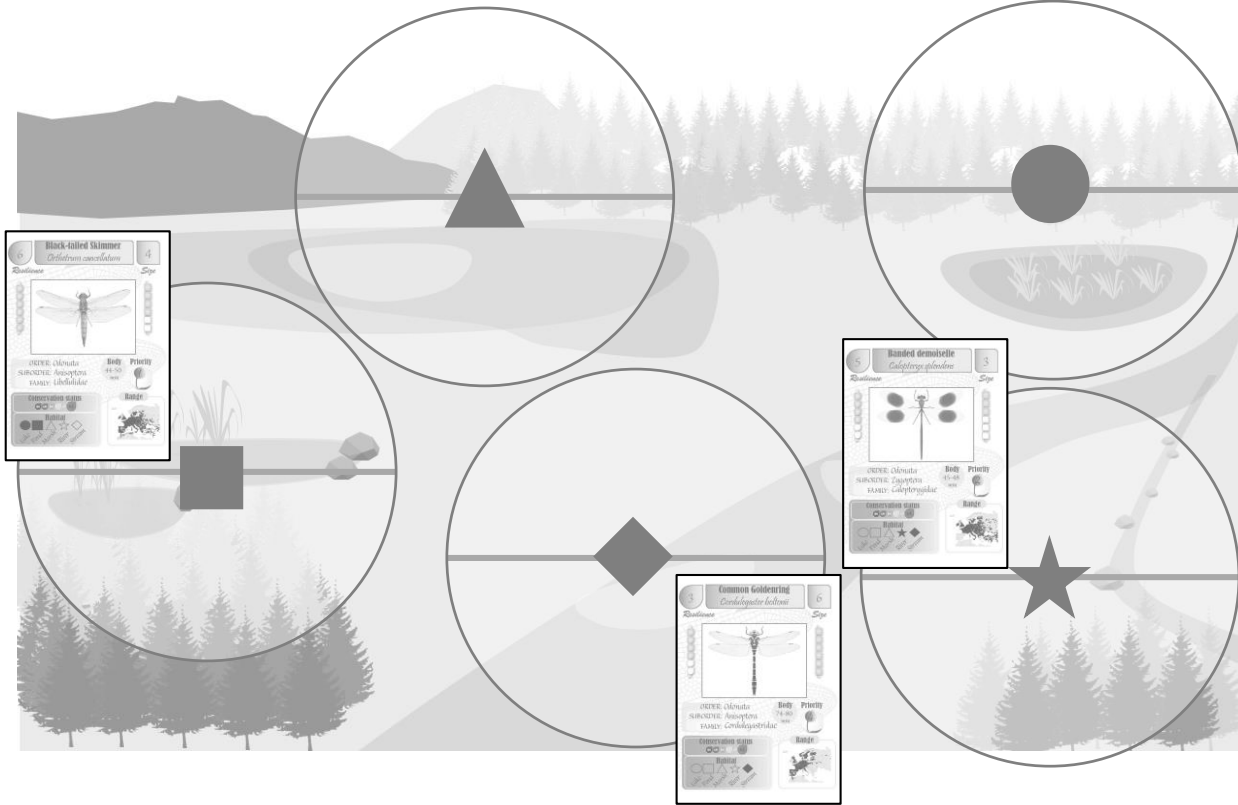

Player 2

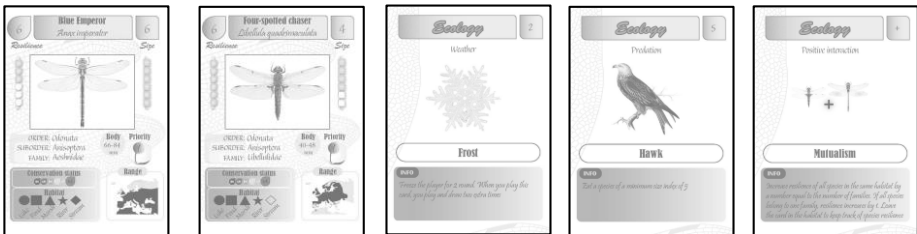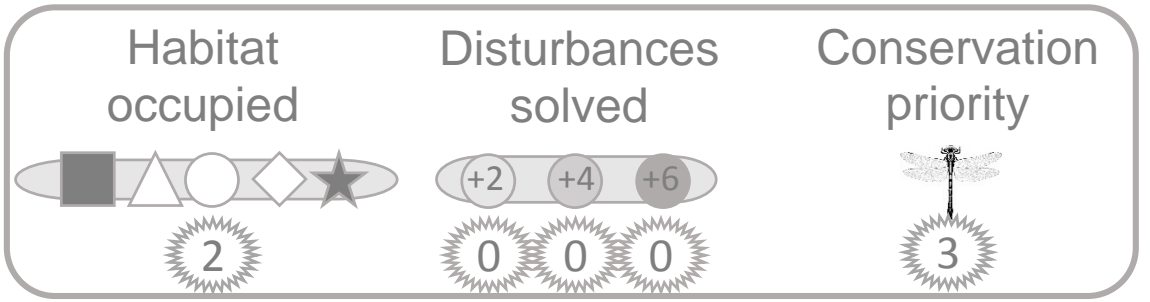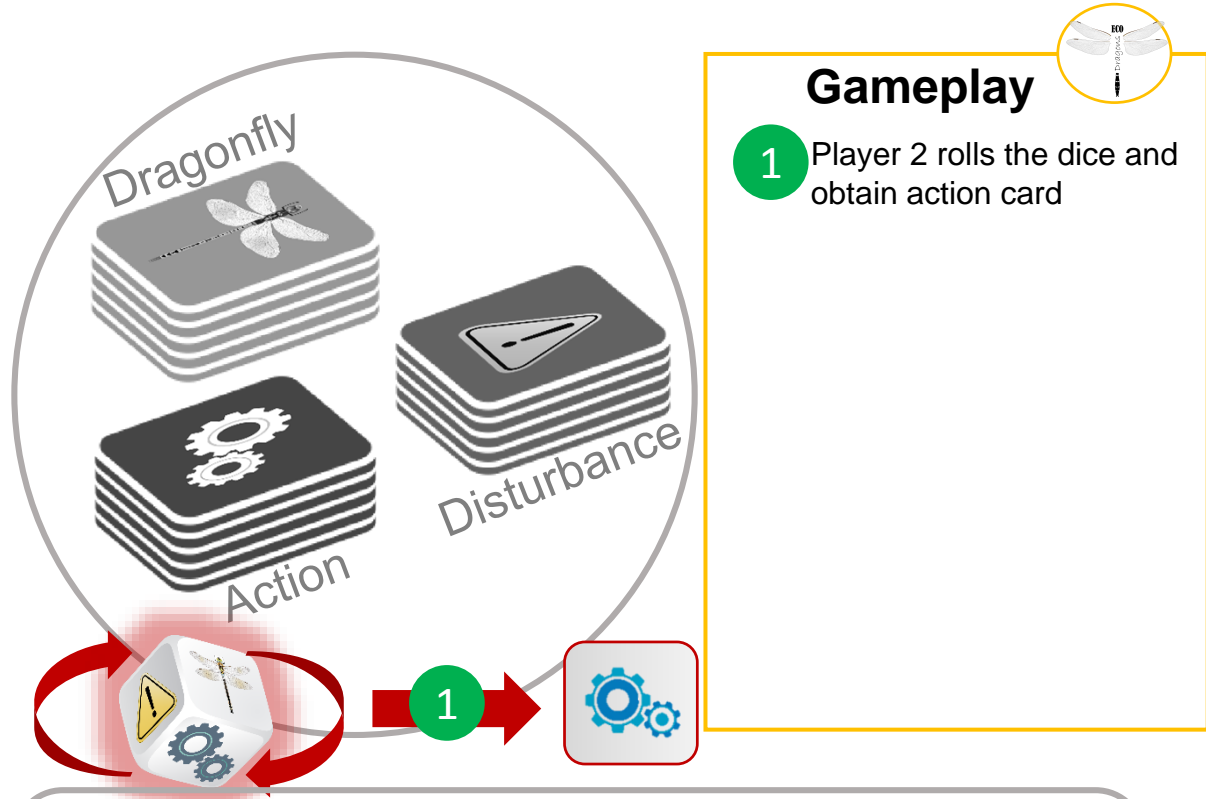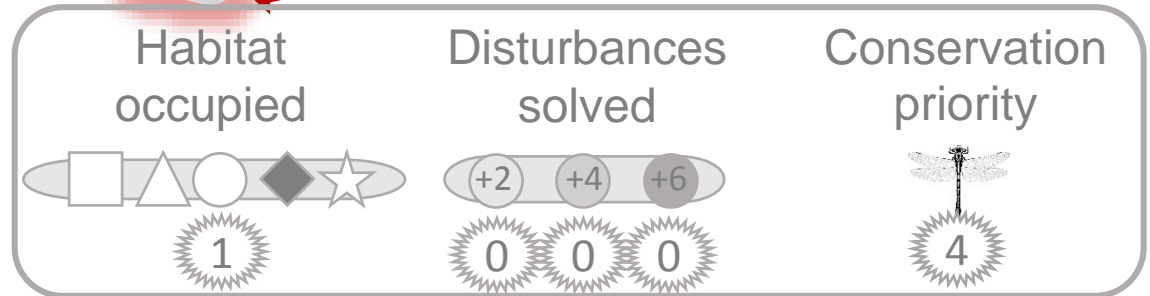



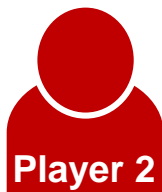

## Player 2

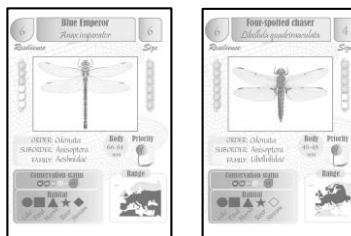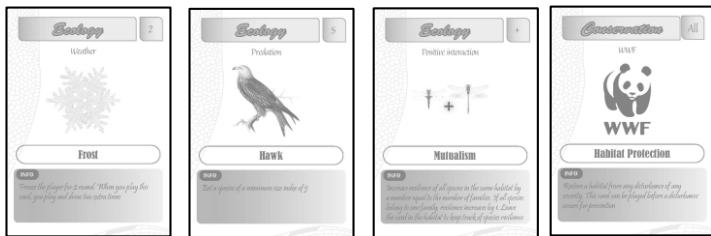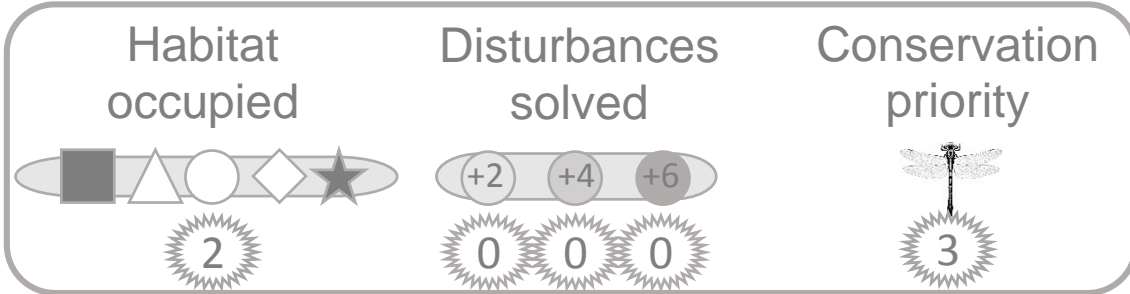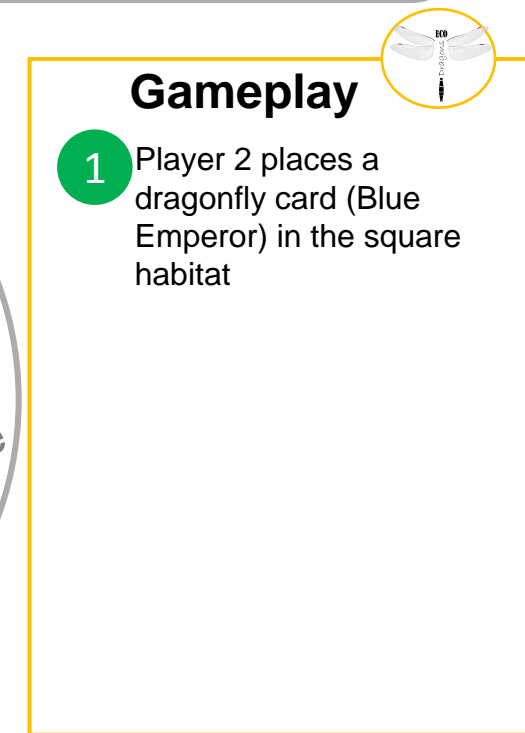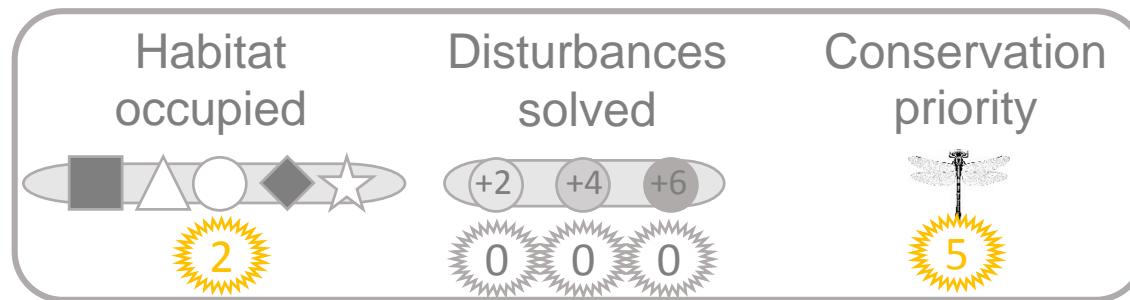

Player 1

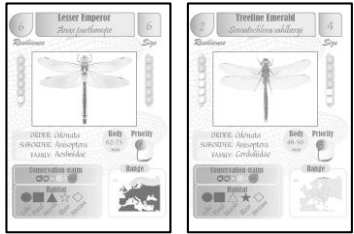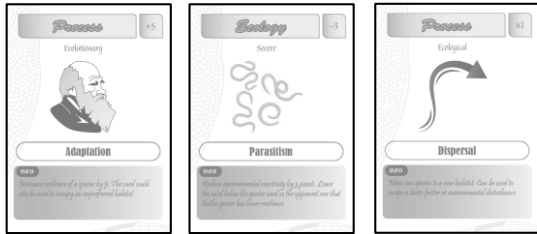

Habitat occupied

Disturbances solved

Conservation priority

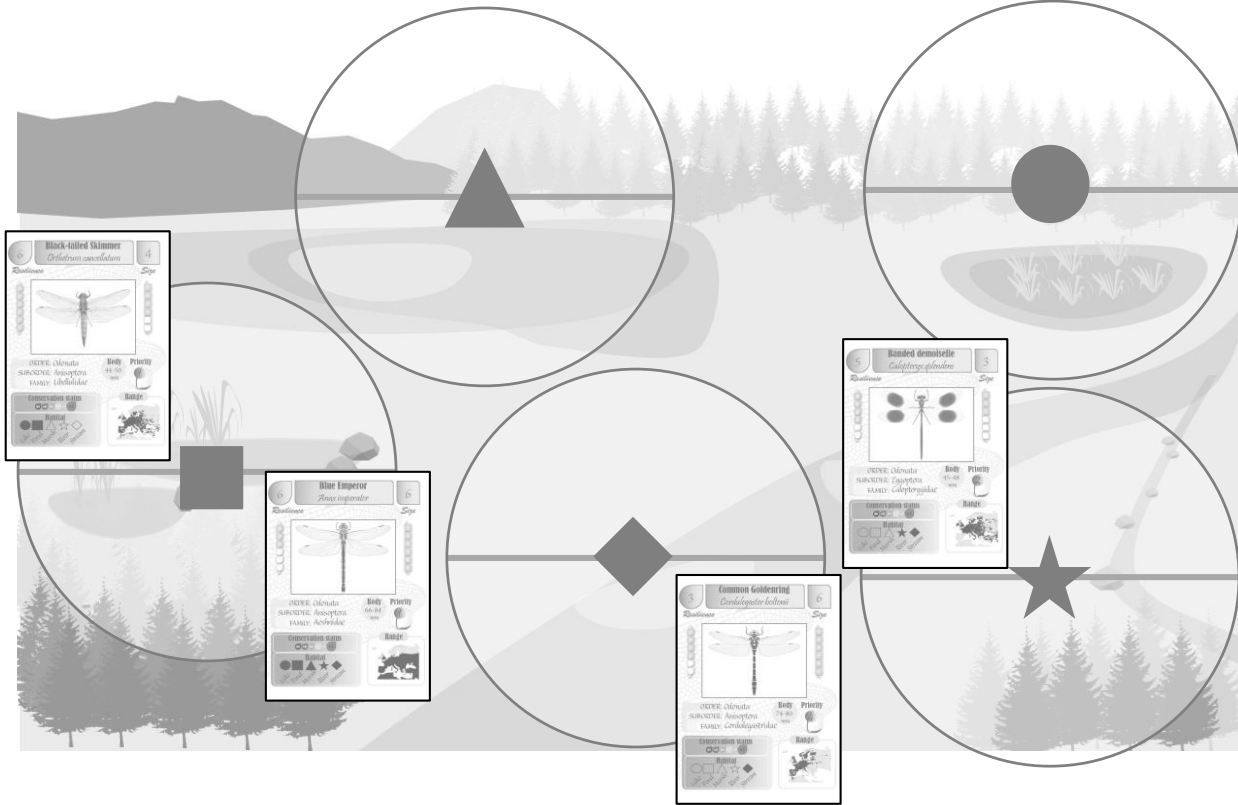

Player 2

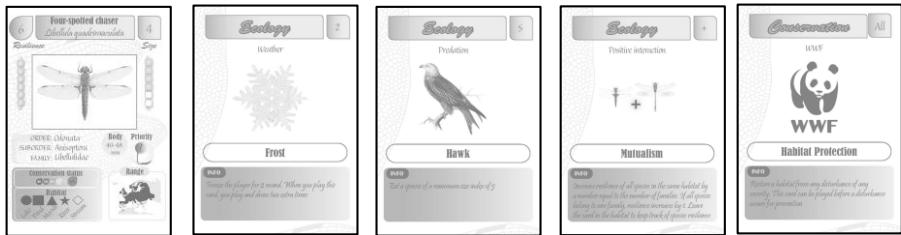

Dragonfly

Action

Disturbance

1

Habitat occupied

Disturbances solved

Conservation priority

### Gameplay

1 Player 1 rolls the dice and obtain the disturbance card



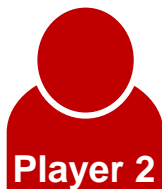

## Player 2

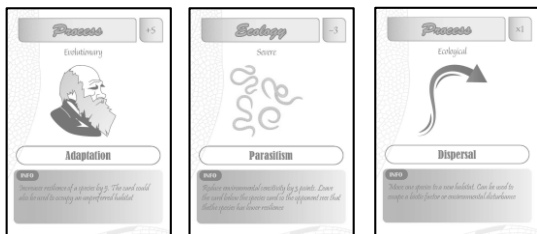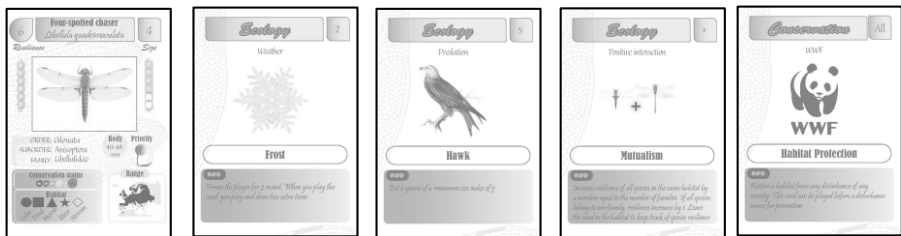

Conservation  
priority

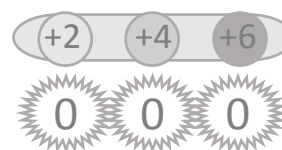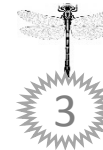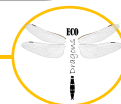

- 1 To save the dragonfly in the diamond habitat, Player 2 uses a conservation card which removes the disturbance from the habitat

Conservation  
priority

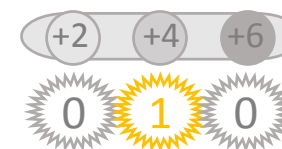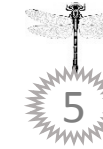

Player 1

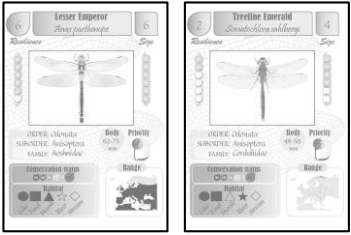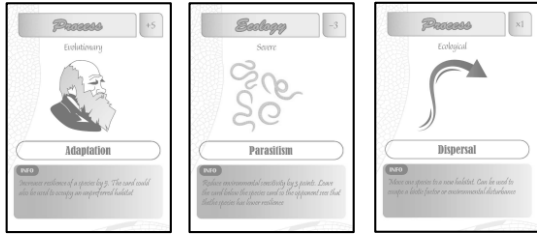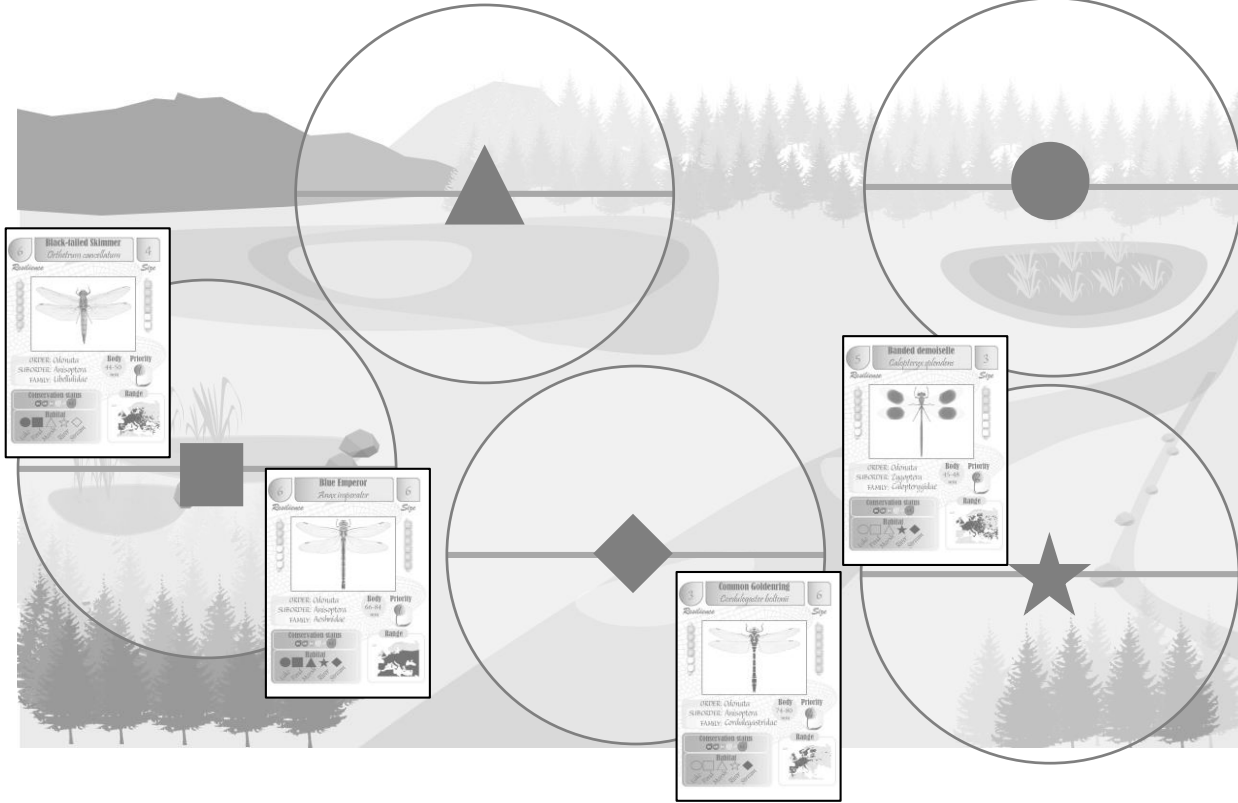

Player 2

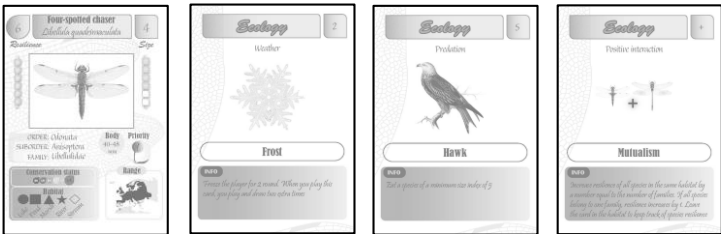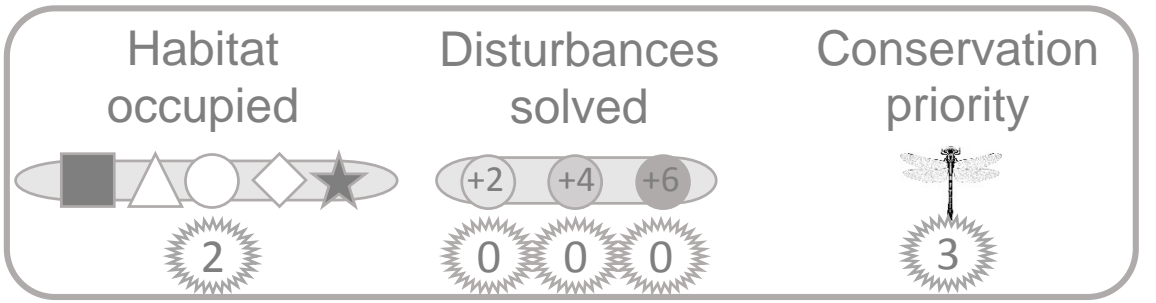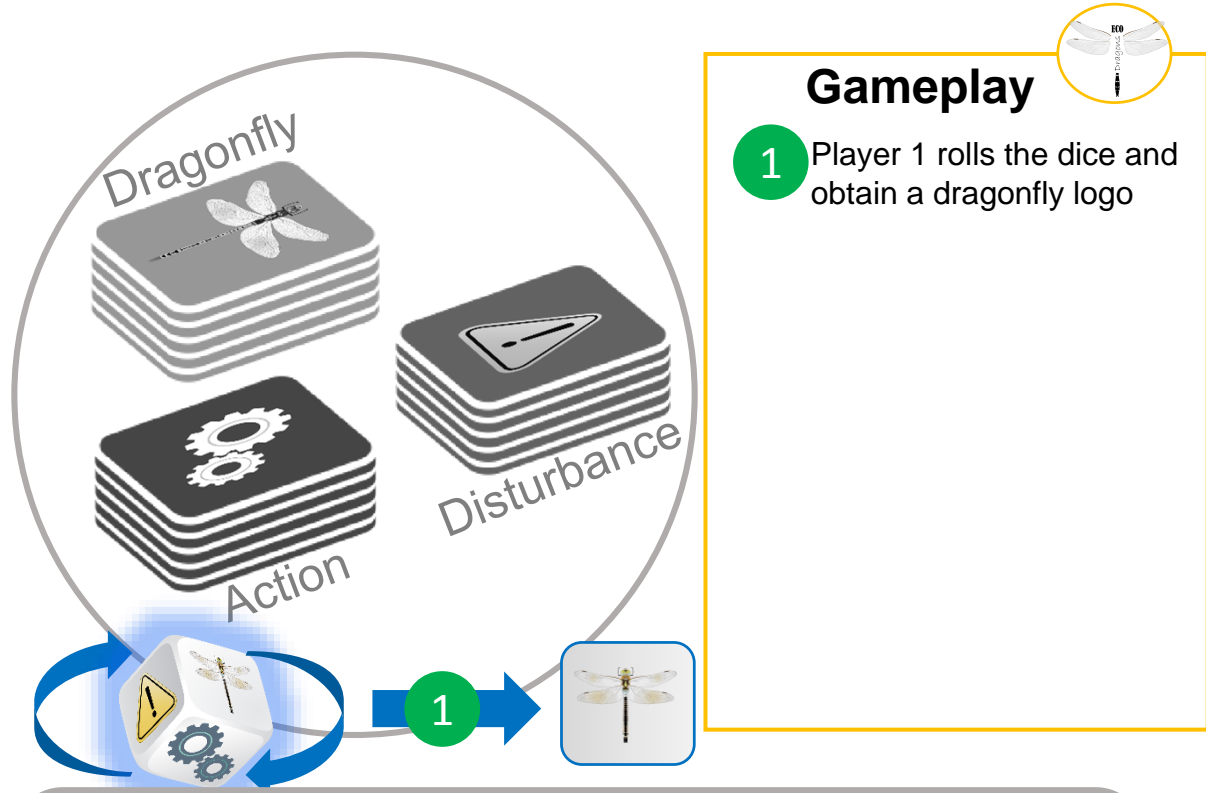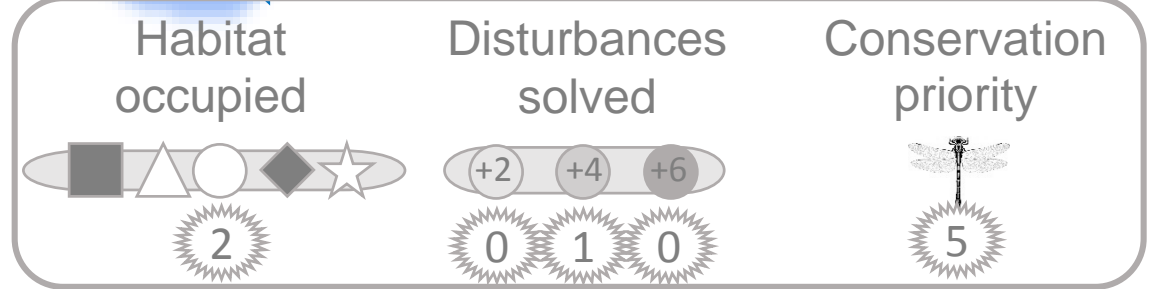

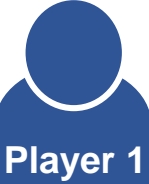

Player 1

Lesser Emperor

6

Treeless Emerald

4

Parasite

5

Scorpio

3

Parasite

4

Blue Hawker

6

Habitat occupied

2

Disturbances solved

+2

+4

+6

0

0

0

Conservation priority

3

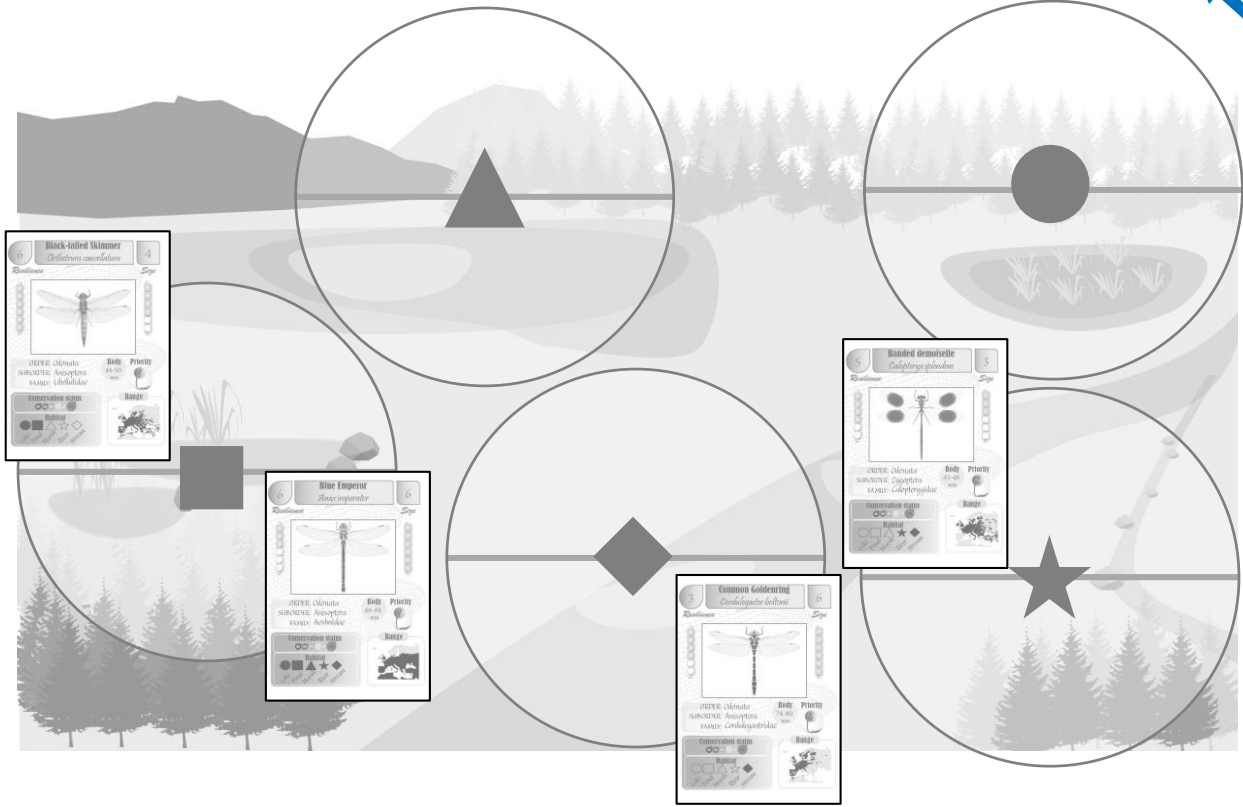

1

Dragonfly

Action

Disturbance

1

Gameplay

Player 1 draws a dragonfly card and obtains the Blue Hawker

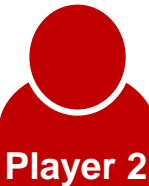

Player 2

Treeless Emerald

4

Scorpio

2

Scorpio

5

Scorpio

3

Habitat occupied

2

Disturbances solved

+2

+4

+6

0

1

0

Conservation priority

5

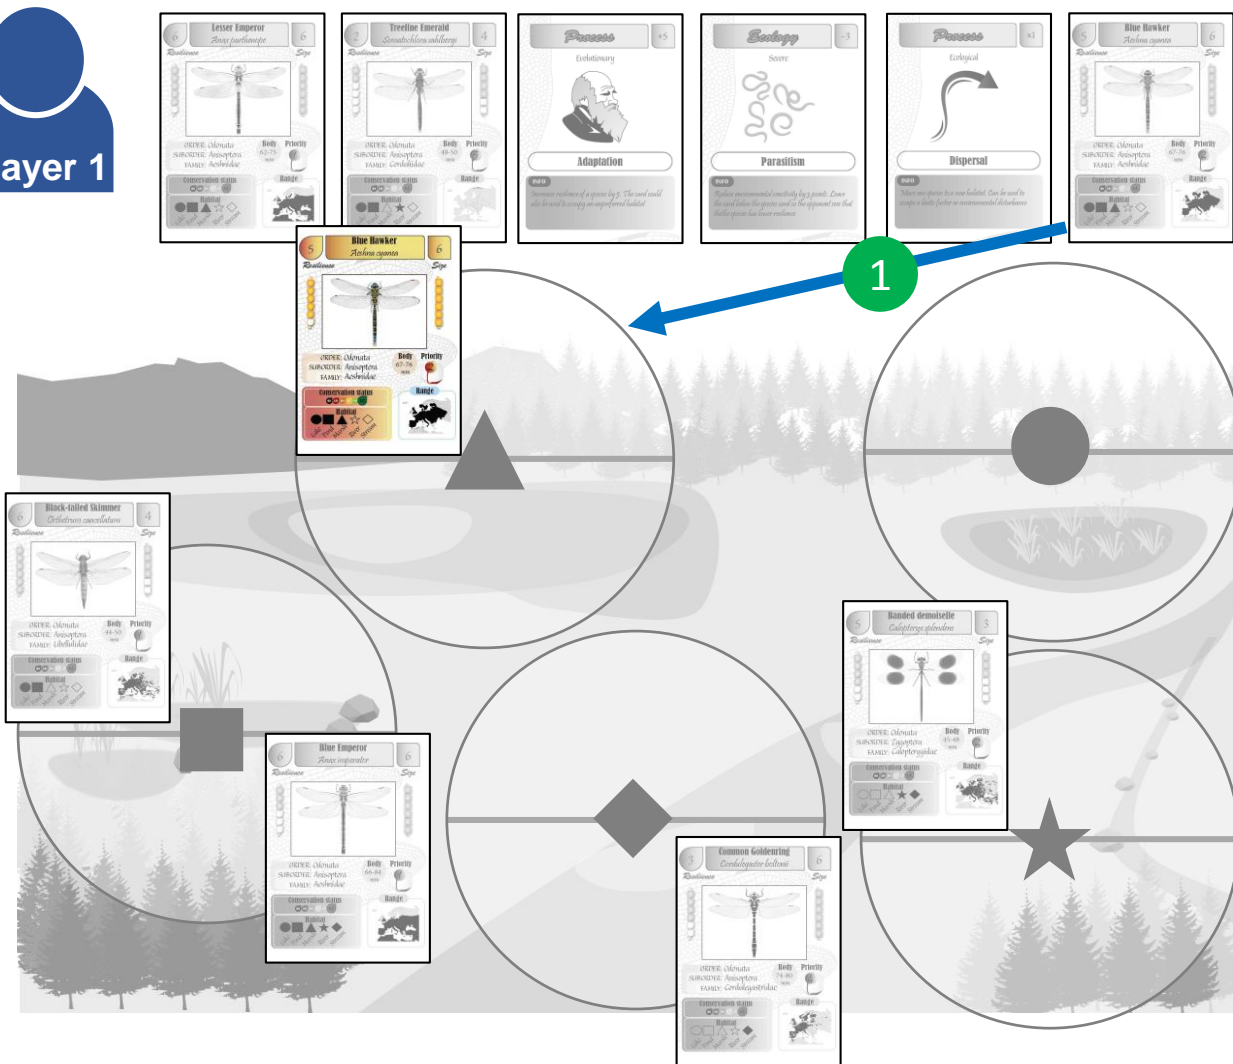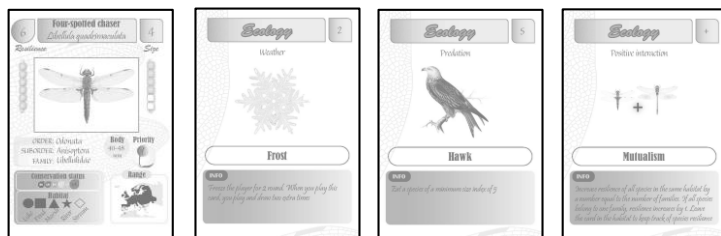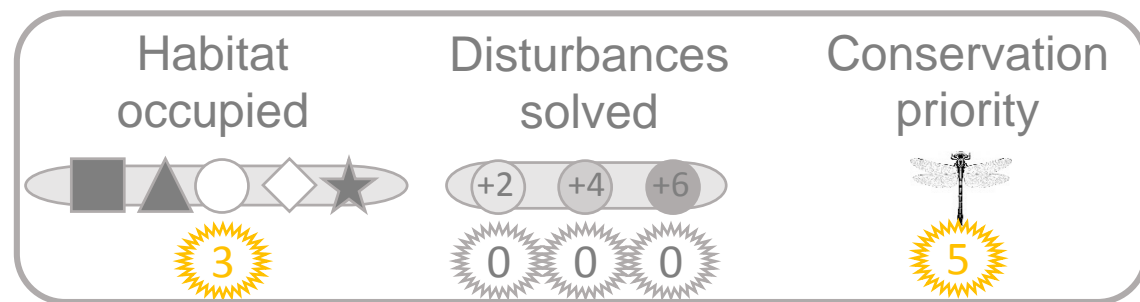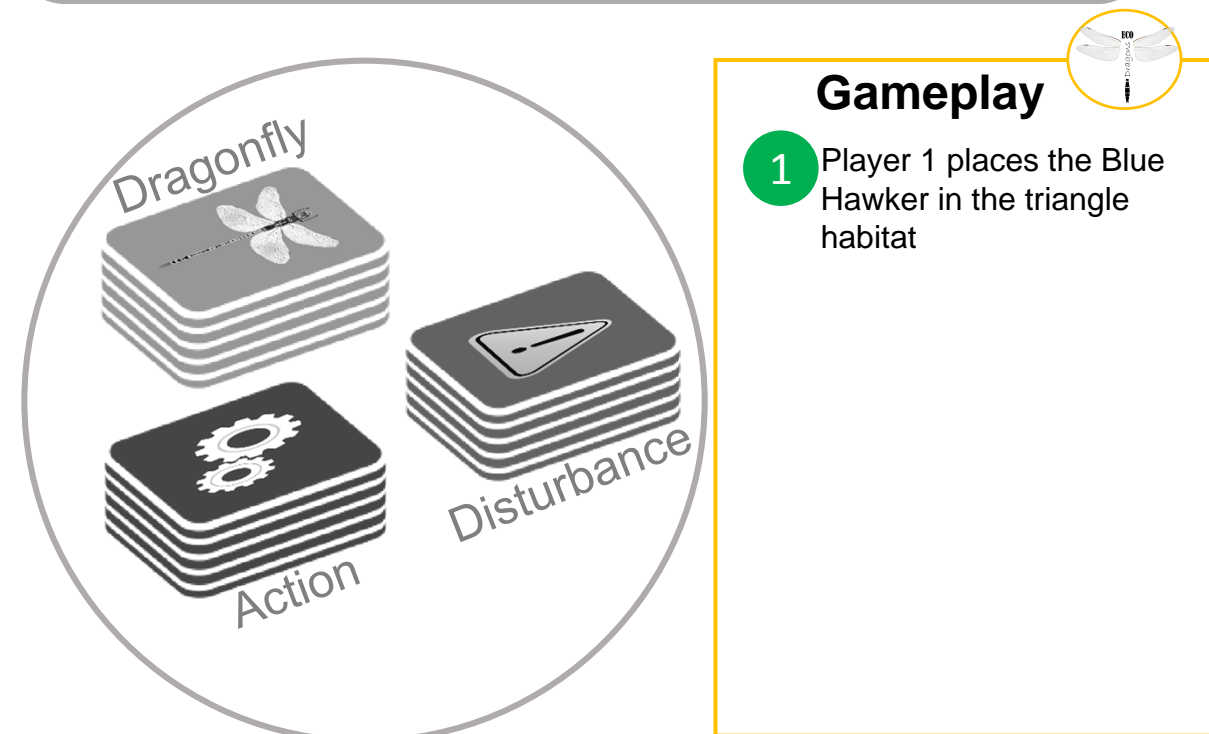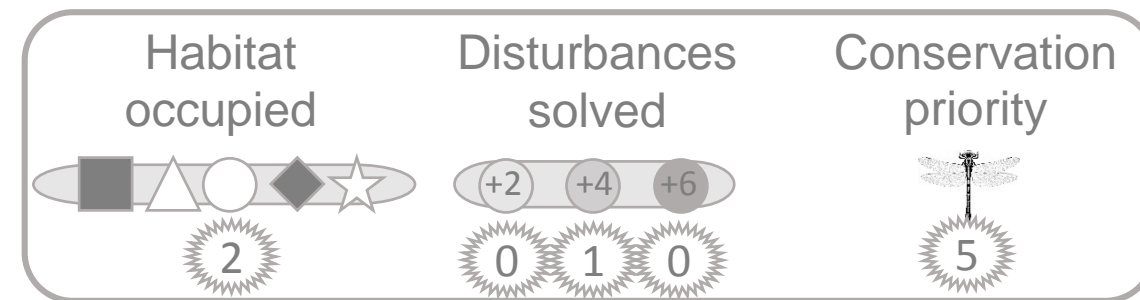

Player 1

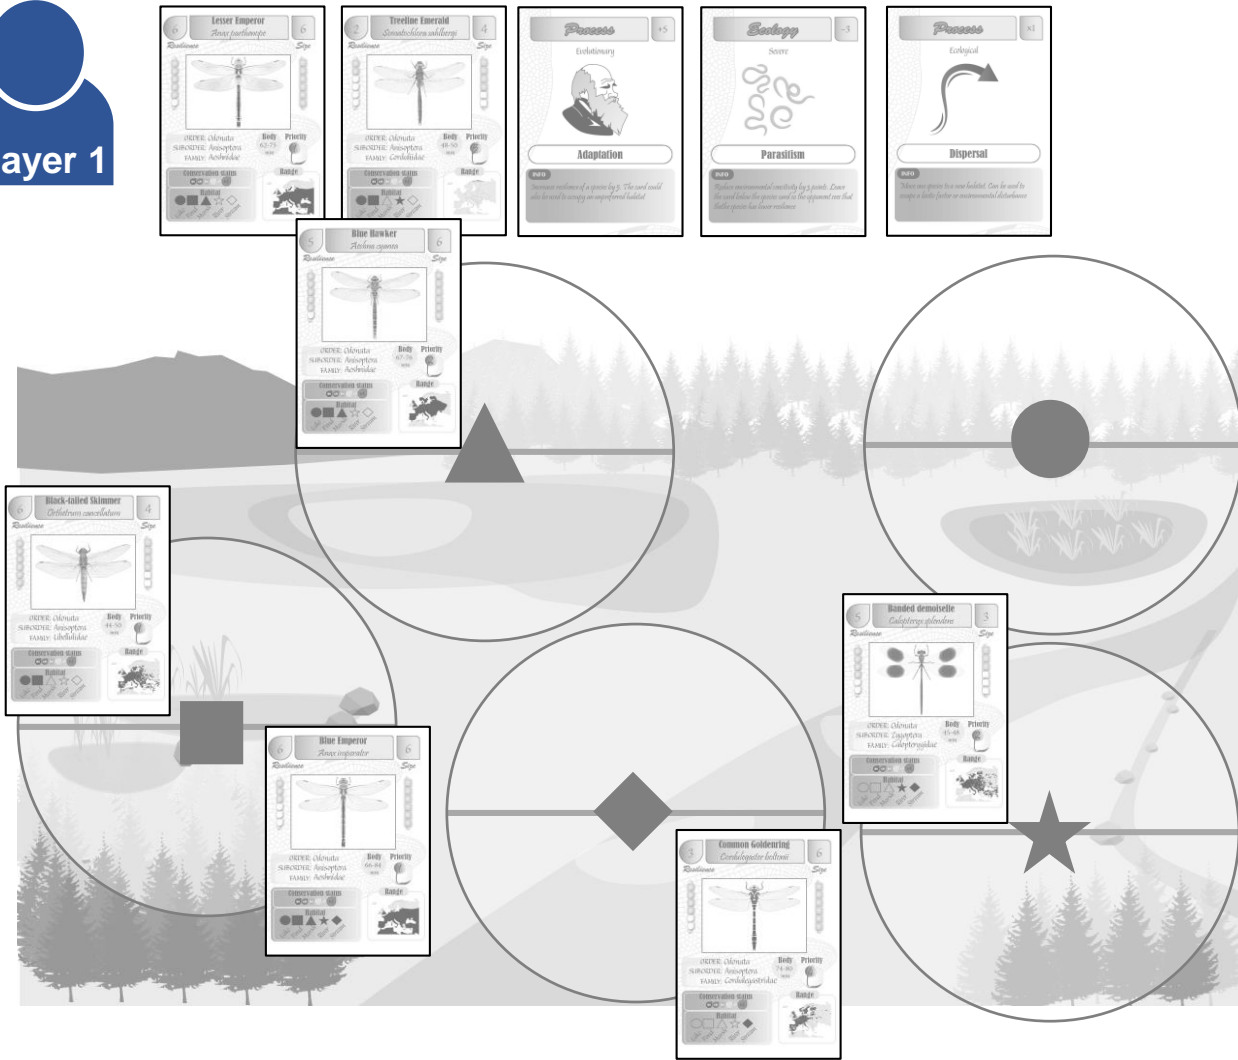

Player 2

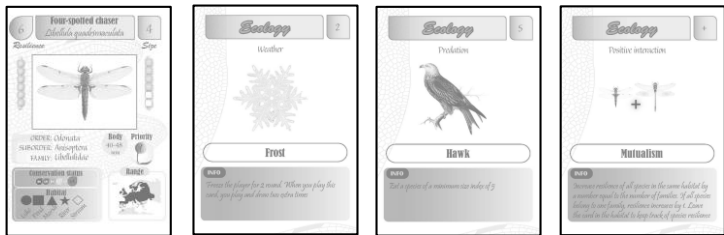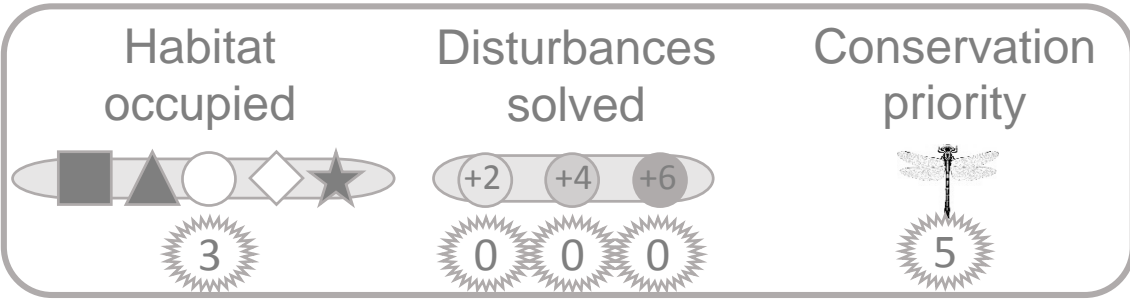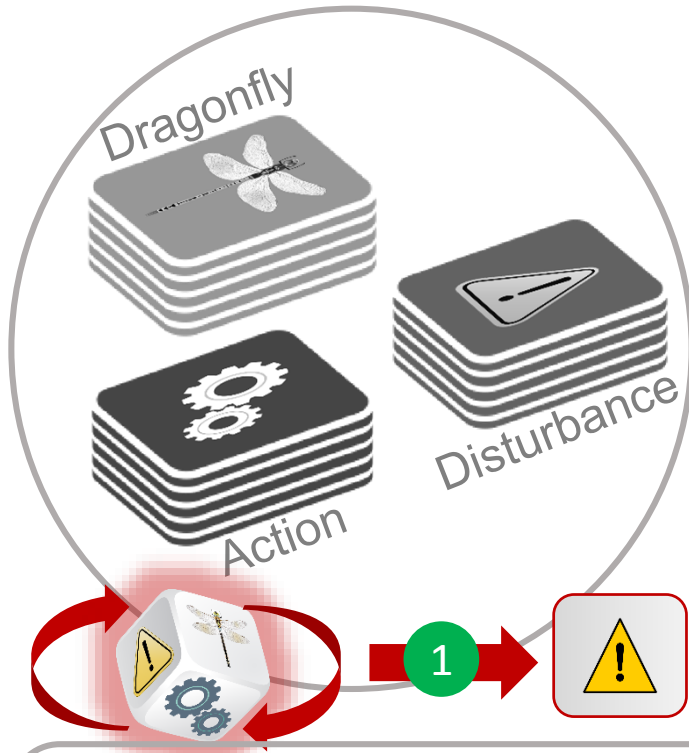

## Gameplay

- 1 Player 2 rolls the dice and obtain the disturbance logo

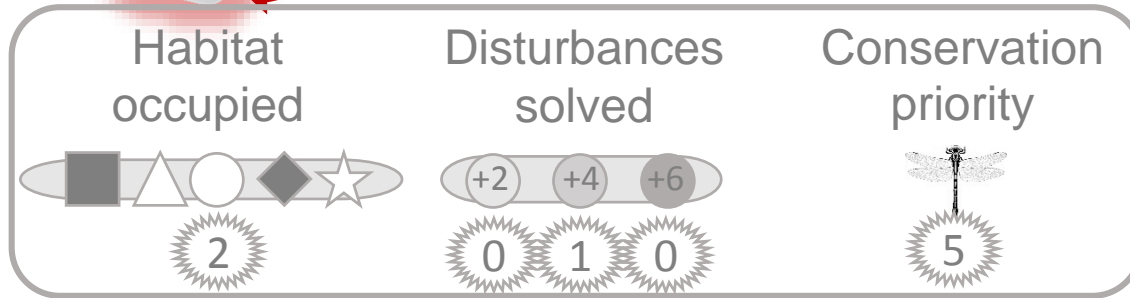

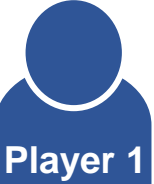

Player 1

Lesser Emperor

6

Treeless Emerald

4

Panacea

5

Scorpio

3

Panacea

4

Blue Hawker

6

Black-tailed Skimmer

4

Blue Emperor

6

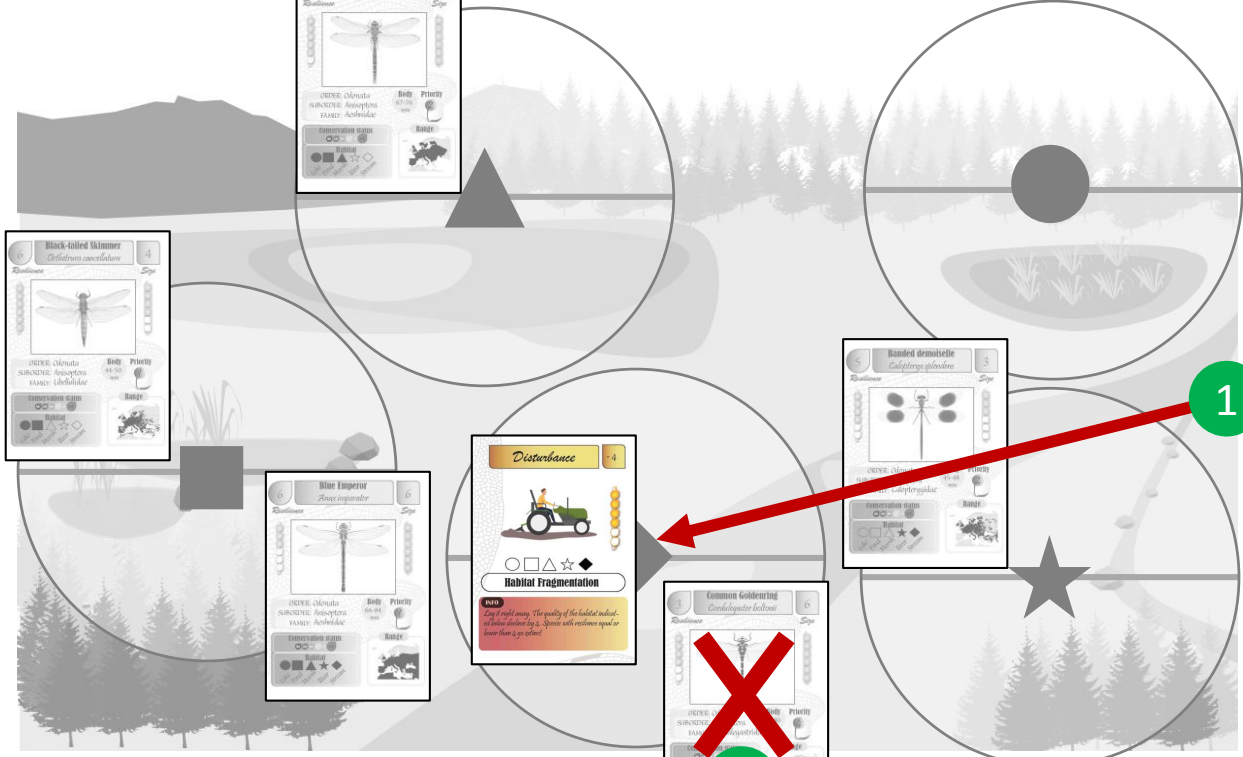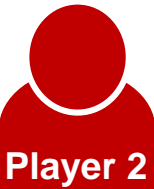

Player 2

Four-spotted Chaser

4

Scorpio

2

Scorpio

5

Scorpio

4

Habitat occupied

3

Disturbances solved

0 0 0

Conservation priority

5

Disturbance

-4

Habitat Fragmentation

Action

Disturbance

Gameplay

1

Player 2 obtains Habitat fragmentation card (quite strong) for the diamond card

2

This disturbance level (Severity=4) is beyond the Resilience of the Common Goldenring (Resilience=3), thus the dragonfly will die

Habitat occupied

2

Disturbances solved

0 1 0

Conservation priority

1



Player 1

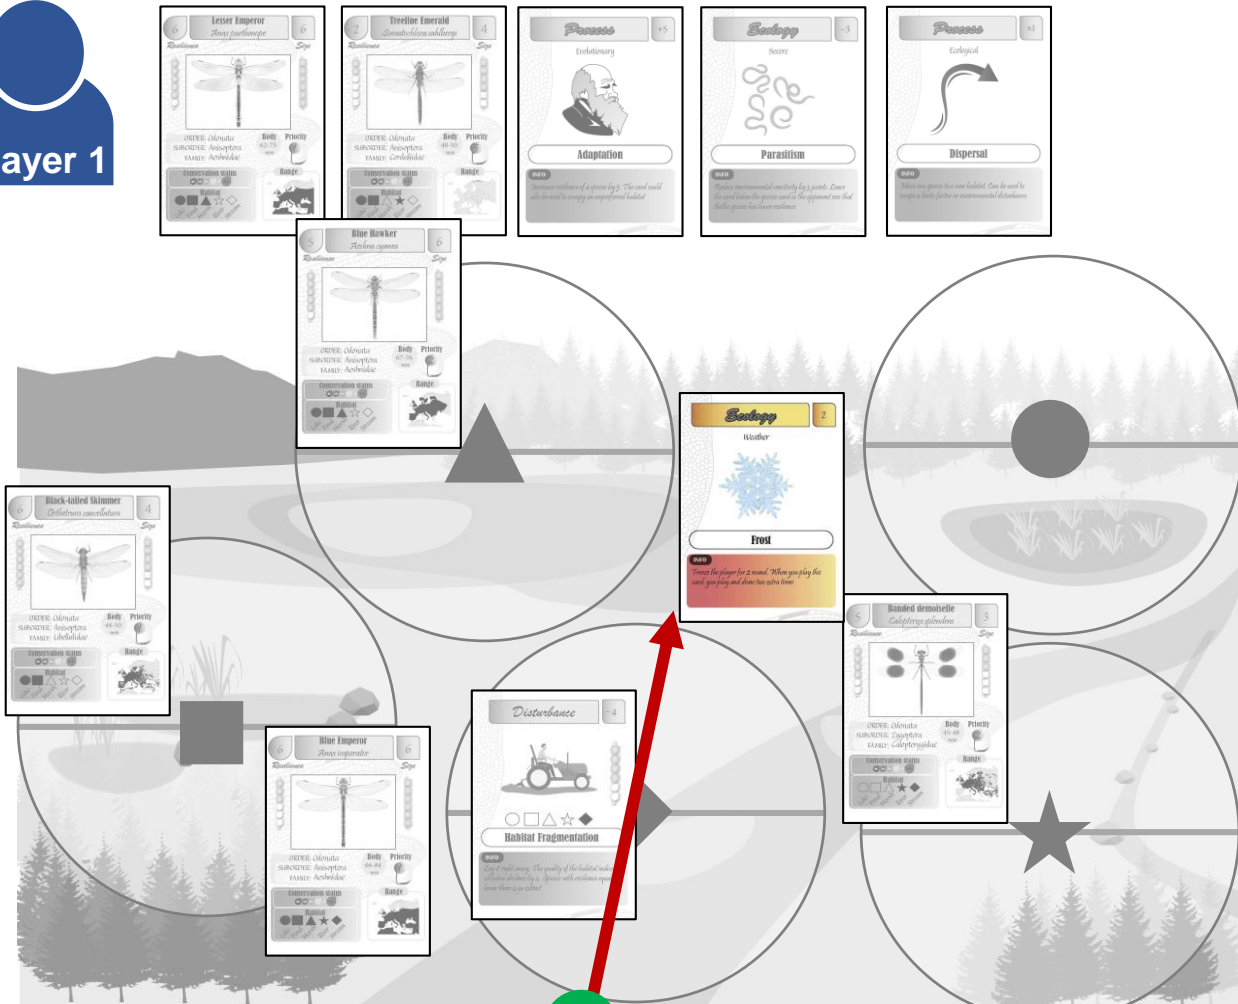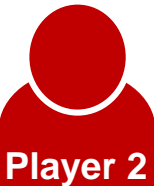

Player 2

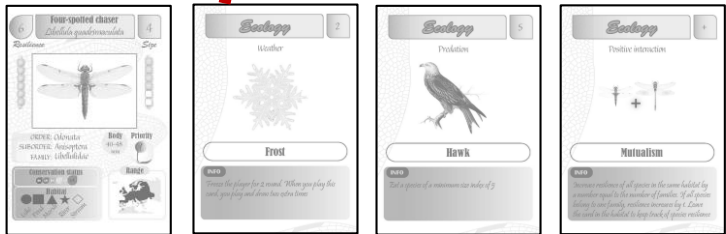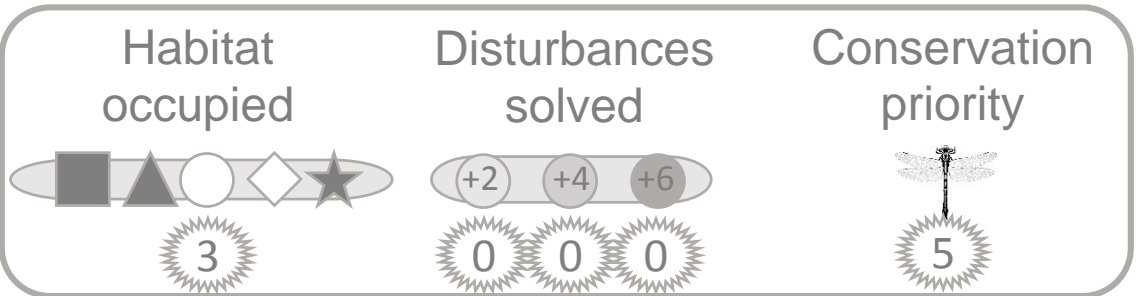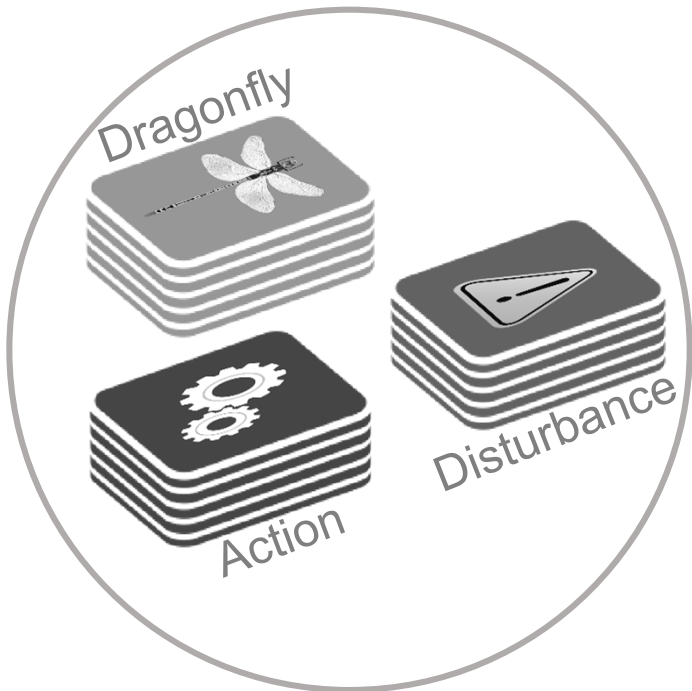

**Gameplay**

1 Player 2 plays the Frost card which freeze Player 1 from playing for two rounds

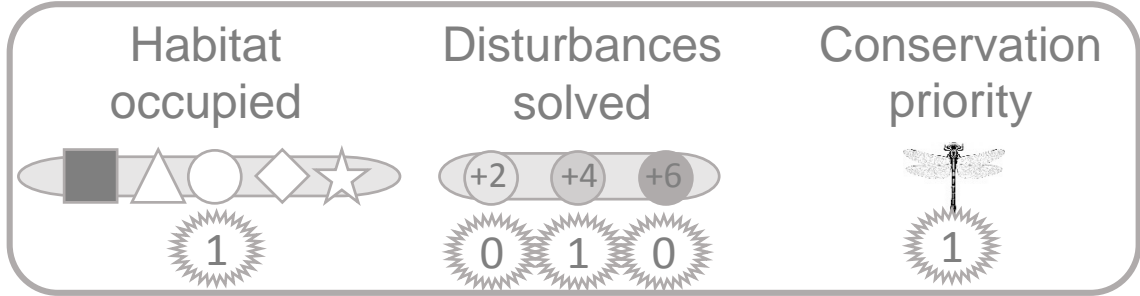



Player 1

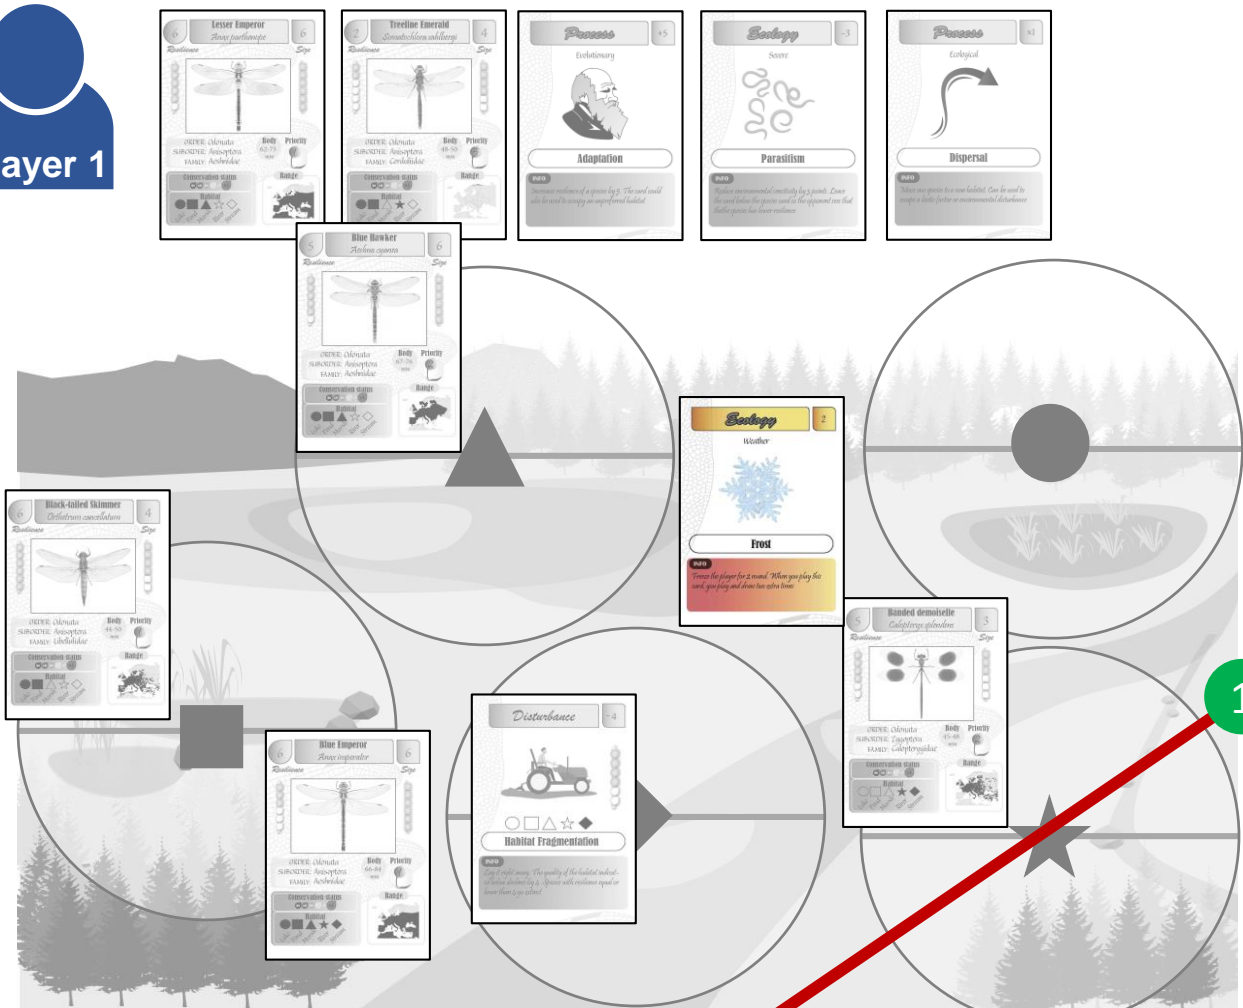

Player 2

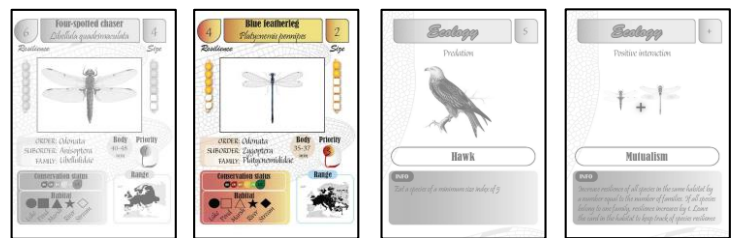

Habitat occupied

Disturbances solved

Conservation priority

3

0 0 0

5

Dragonfly

Action

Disturbance

1

Gameplay

1

Player 2 draws a dragonfly card and receives the 'Blue Featherleg'

Habitat occupied

Disturbances solved

Conservation priority

1

0 1 0

1



Player 1

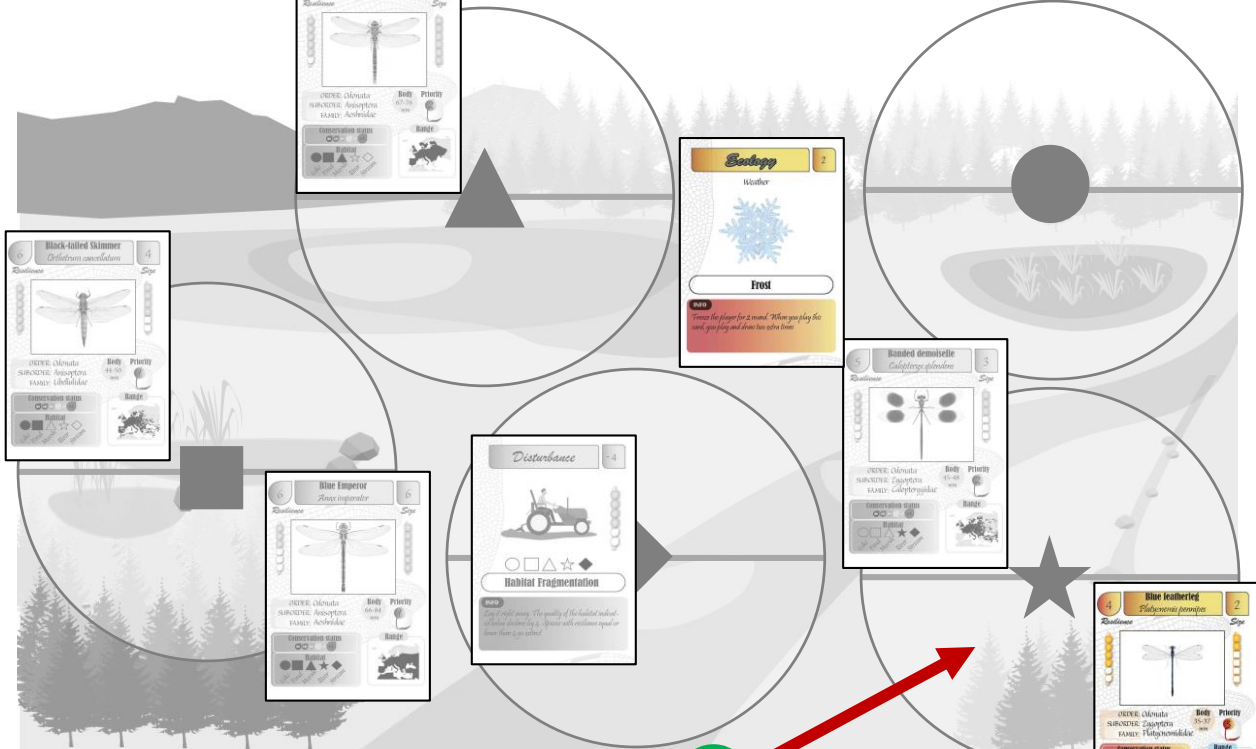

1



Player 2

Lesser Emperor  
*Stellateneura punctulata*

Blue Emperor  
*Stellateneura punctulata*

Blue Featherleg  
*Stellateneura punctulata*

Parasitism  
*Stellateneura punctulata*

Dispersal  
*Stellateneura punctulata*

Habitat occupied

Disturbances solved

Conservation priority

Dragonfly

Action

Disturbance

1

Player 2 places the dragonfly card (Blue Featherleg) in the star habitat

Habitat occupied

Disturbances solved

Conservation priority



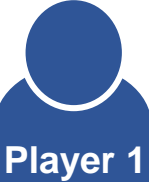

Player 1

Lesser Emperor

*Ascalapha trichoptera*

6

Endurance

Size

ORIGIN: Colorado

SURVIVAL: Anisoptera

FAMILY: Libellulidae

Body

Priority

65-75

low

Range

Treefrog Emerald

*Stenochiron metallus*

4

Endurance

Size

ORIGIN: Colorado

SURVIVAL: Anisoptera

FAMILY: Libellulidae

Body

Priority

45-55

low

Range

Parasite

Evolutionary

+5

Adaptation

Notes

Increase resistance of a species by 5. Thread could also be used to occupy an unoccupied habitat.

Scorpio

Scorpio

-1

Parasitism

Notes

Reduce environmental suitability by 1 point. Can be used to avoid before the species and is the opposite of the other species has lower resistance.

Parasite

Ecological

+1

Dispersal

Notes

Place one species in one habitat. Can be used to occupy a habit faster in environmental disturbance.

Disturbance

4

Habitat Fragmentation

Notes

Use 2 points away. The quality of the habitat reduces. A species can only be a species with resistance equal or more than 4 points.

Player 2

Fruit spotted dragon

*Libellula quadrimaculata*

4

Endurance

Size

ORIGIN: Colorado

SURVIVAL: Anisoptera

FAMILY: Libellulidae

Body

Priority

60-70

low

Range

Brilliant Emerald

*Stenochiron metallus*

4

Endurance

Size

ORIGIN: Colorado

SURVIVAL: Anisoptera

FAMILY: Libellulidae

Body

Priority

45-55

low

Range

Scorpio

Predation

5

Hawk

Notes

Take a species of a maximum resistance of 5.

Scorpio

Positive interaction

1

Mutualism

Notes

Increase resistance of all species in the same habitat by 1 point. Can be used to avoid before the species and is the opposite of the other species has lower resistance.

Habitat occupied

3

Disturbances solved

+2

+4

+6

0

0

0

Conservation priority

5

Dragonfly

Action

Disturbance

1

Player 2 draws a dragonfly card and obtains the 'Brilliant Emerald'

Habitat occupied

2

Disturbances solved

+2

+4

+6

0

1

0

Conservation priority

4

Player 1

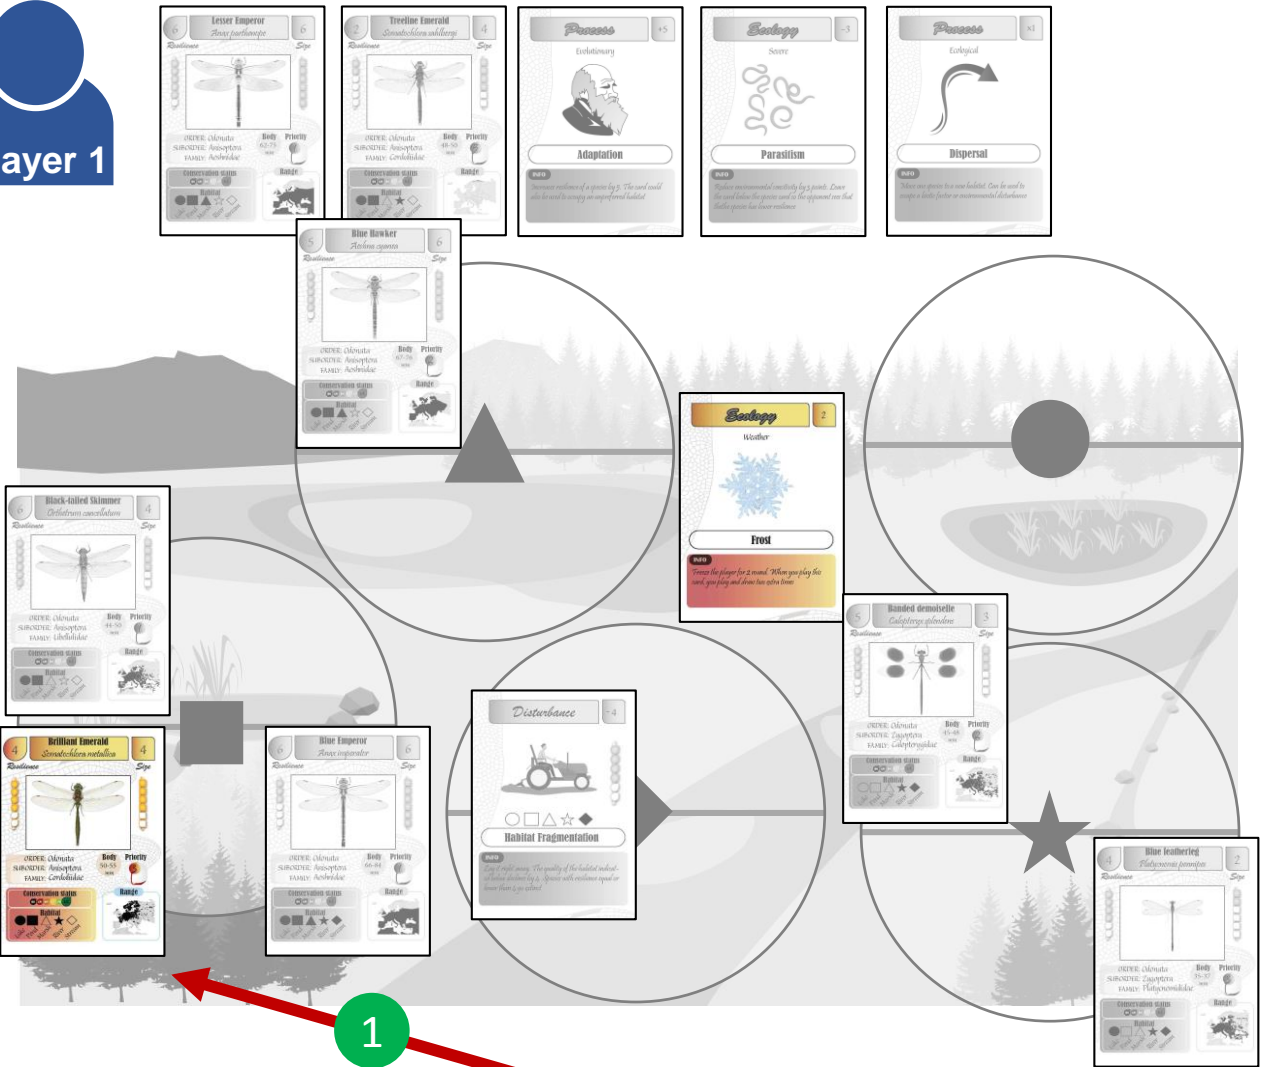

Player 2

Player 2's hand of cards:

- Brilliant Emerald** (Dragonfly card)
- Scorched Emerald** (Dragonfly card)
- Hawk** (Bird card)
- Mutualism** (Ecology card)

Player 1's status:

- Habitat occupied:** 3 (represented by a square, triangle, and circle)
- Disturbances solved:** 0 (represented by three circles with +2, +4, +6)
- Conservation priority:** 5 (represented by a dragonfly icon)

Dragonfly Action Disturbance

The icons represent the Dragonfly, Action, and Disturbance elements of the game.

Gameplay

1 Player 2 places the Brilliant Emerald in the square habitat

Player 2's status:

- Habitat occupied:** 2 (represented by a square and a triangle)
- Disturbances solved:** 1 (represented by three circles with +2, +4, +6)
- Conservation priority:** 7 (represented by a dragonfly icon)

Player 1

Gameplay area showing a landscape with a pond and forest. Various dragonfly cards are placed around the landscape, including Lesser Emperor, Treeless Emerald, Blue Hawker, Black-tailed Skimmer, Brilliant Emerald, Blue Emperor, and Banded damselfly. A central card shows a tractor icon and the text "Disturbance" and "Habitat Fragmentation".

Player 2

Dragonfly cards for Player 2: Blue leathery, Hawk, and Mutualism.

Player 1's status bar:

- Habitat occupied: 3 (represented by a square, triangle, circle, diamond, and star)
- Disturbances solved: 0, 0, 0 (represented by +2, +4, +6 icons)
- Conservation priority: 5 (represented by a dragonfly icon)

Gameplay instructions:

**Dragonfly** (represented by a stack of cards with a dragonfly icon)

**Action** (represented by a stack of cards with a gear icon)

**Disturbance** (represented by a stack of cards with a warning icon)

**1** Player 1 rolls the dice and obtain the dragonfly logo

Player 2's status bar:

- Habitat occupied: 2 (represented by a square, triangle, circle, diamond, and star)
- Disturbances solved: 0, 1, 0 (represented by +2, +4, +6 icons)
- Conservation priority: 7 (represented by a dragonfly icon)



Player 1

Gameplay area showing a landscape with various dragonfly habitats (circles) and cards placed on them. Cards include:

- Lesser Emperor (Zygoptera)
- Treetop Emerald (Zygoptera)
- Parasite (Evolutionary)
- Scorpion (Scorpiones)
- Parasite (Ecological)
- Ruddy darter (Zygoptera)
- Blue Hawker (Anisoptera)
- Black-tailed Skimmer (Zygoptera)
- Brilliant Emerald (Zygoptera)
- Blue Emperor (Zygoptera)
- Disturbance (Habitat Fragmentation)
- Blue leathering (Zygoptera)
- Blue-spotted damselfly (Zygoptera)
- Hawk (Birds)
- Mutualism (Ecological)

Player 2

Habitat occupied: 4  
Disturbances solved: 0, 0, 0  
Conservation priority: 6

Dragonfly  
Action  
Disturbance

Gameplay

1 Player 1 places a dragonfly card (Ruddy darter) in the circle habitat

Habitat occupied: 2  
Disturbances solved: 0, 1, 0  
Conservation priority: 7

Player 1

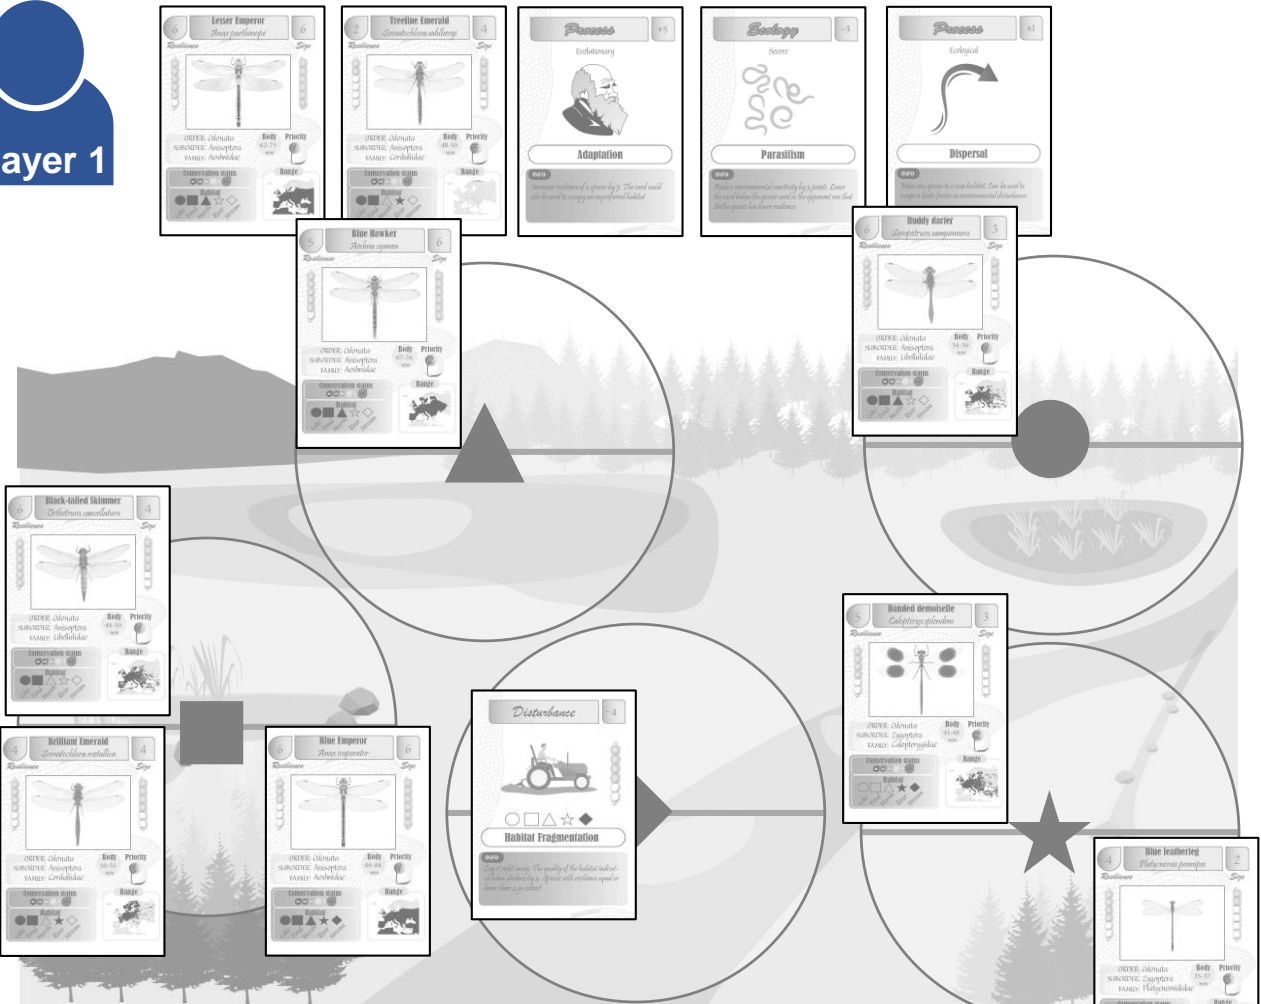

Player 2

Dragonfly card: Blue-tailed Skimmer (Zygoptera: Libellulidae)

Dragonfly card: Blue-tailed Skimmer (Zygoptera: Libellulidae)

Dragonfly card: Blue-tailed Skimmer (Zygoptera: Libellulidae)

Habitat occupied: 4  
Disturbances solved: 0, 0, 0  
Conservation priority: 6

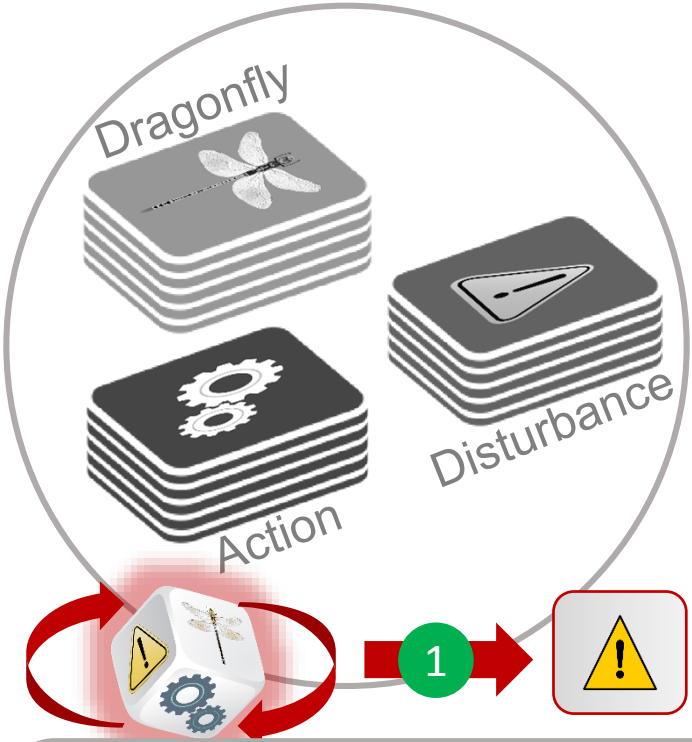

Gameplay  
1 Player 2 rolls the dice and obtain the disturbance card

Habitat occupied: 2  
Disturbances solved: 0, 1, 0  
Conservation priority: 7

Player 1

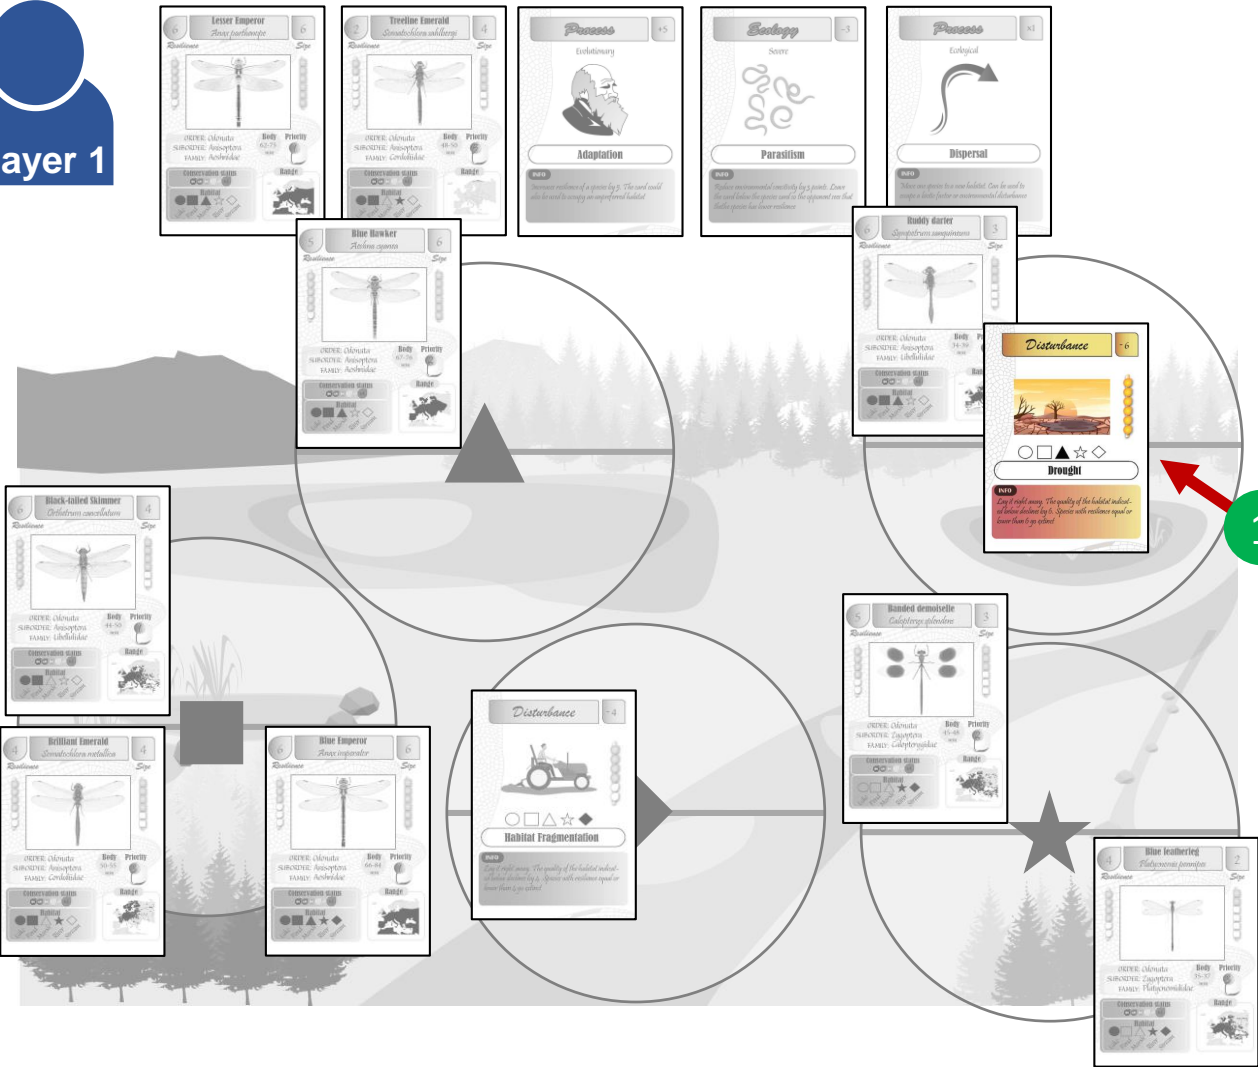

Player 2

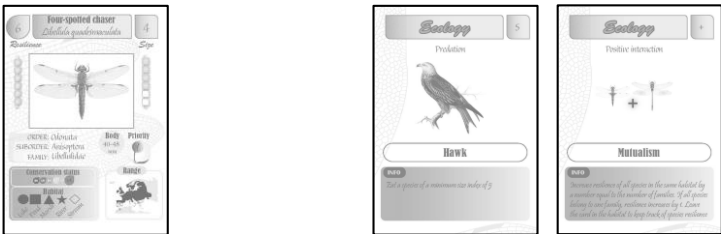

Habitat occupied: 4  
Disturbances solved: 0, 0, 0  
Conservation priority: 6

Dragonfly  
Disturbance: Drought  
Disturbance

Gameplay

1 The disturbance is Drought (severe) for the circle habitat which should kill any dragonfly in the habitat

Habitat occupied: 2  
Disturbances solved: 0, 1, 0  
Conservation priority: 7

Player 1

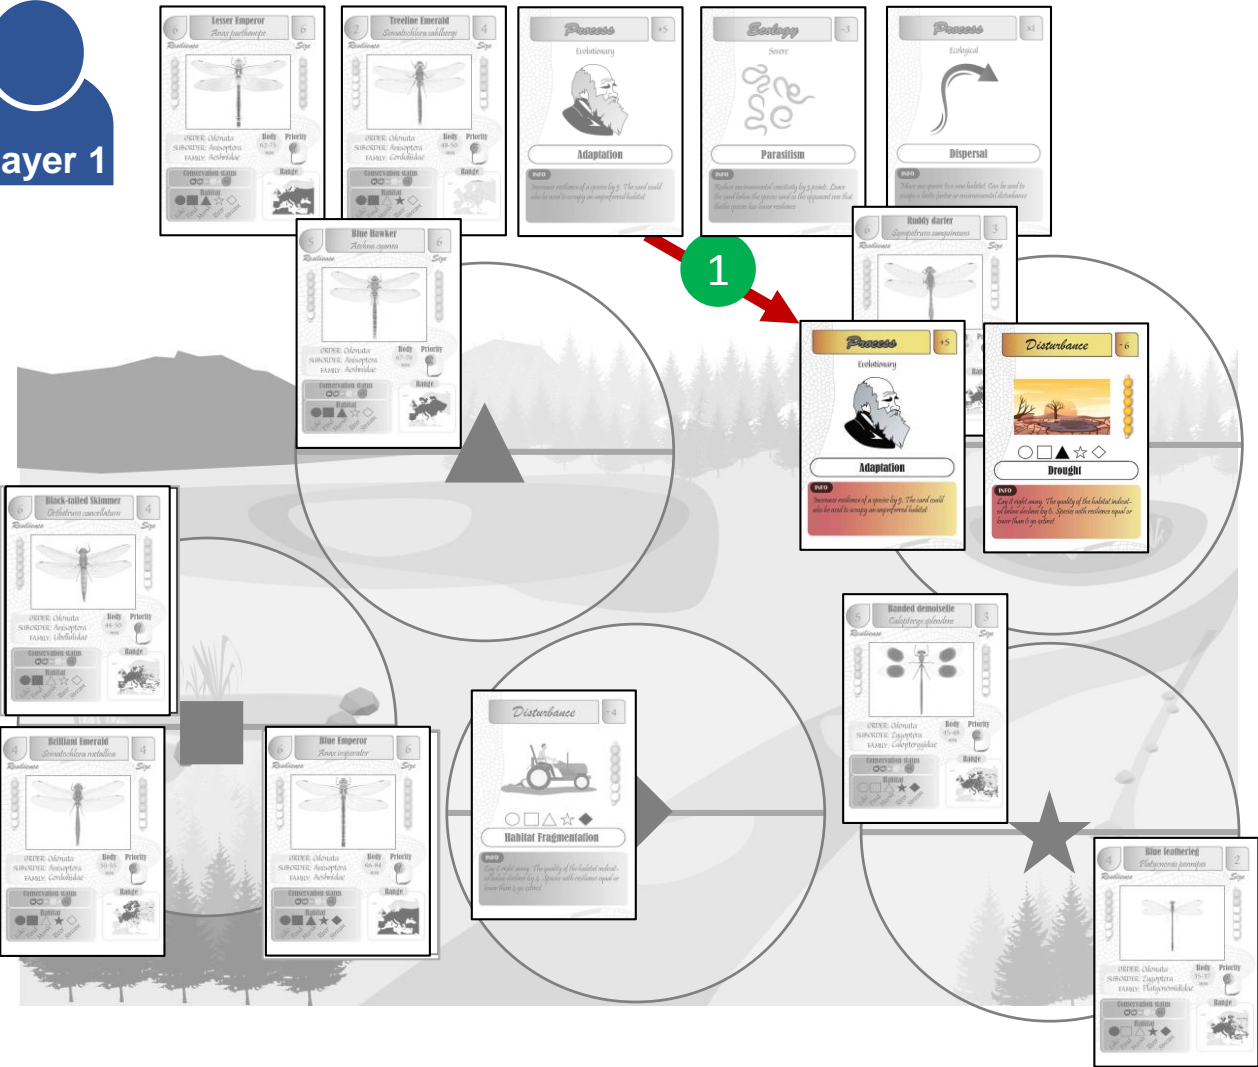

Player 2

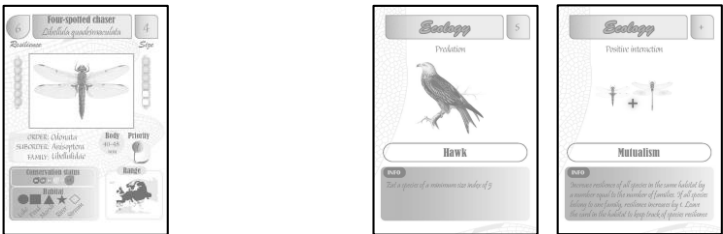

Habitat occupied

Disturbances solved

Conservation priority

4

0 0 0

6

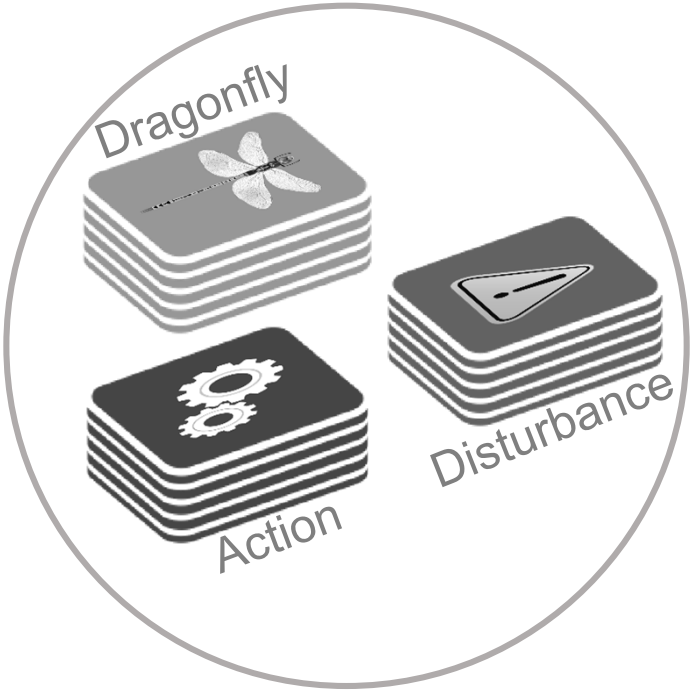

Gameplay

1

Player 1 defends the dragonfly by using 'Adaptation card' which allows the species to obtain an extra 5 resilience points.

Habitat occupied

Disturbances solved

Conservation priority

2

0 1 0

7

Player 1

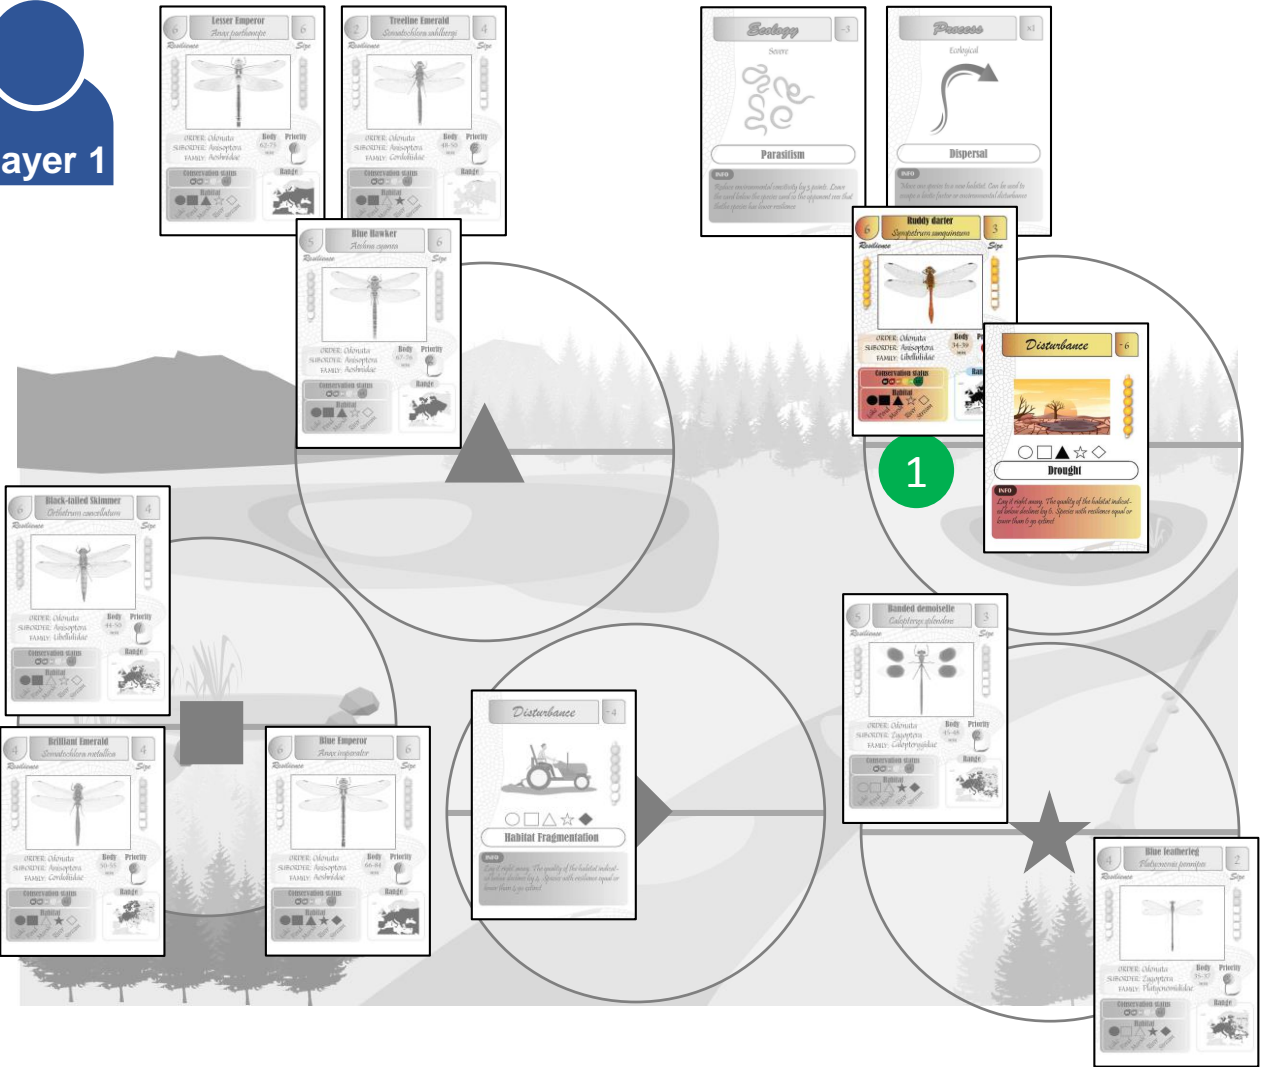

Player 2

Dragonfly card: *Libellula quadrimaculata* (Common blue damselfly)

Dragonfly card: *Buteo borealis* (Golden Eagle)

Dragonfly card: *Libellula quadrimaculata* (Common blue damselfly)

Habitat occupied

Disturbances solved

Conservation priority

Dragonfly

Action

Disturbance

1 So, the Ruddy darter survives, but the disturbance still persists in the habitat

Habitat occupied

Disturbances solved

Conservation priority

Player 1

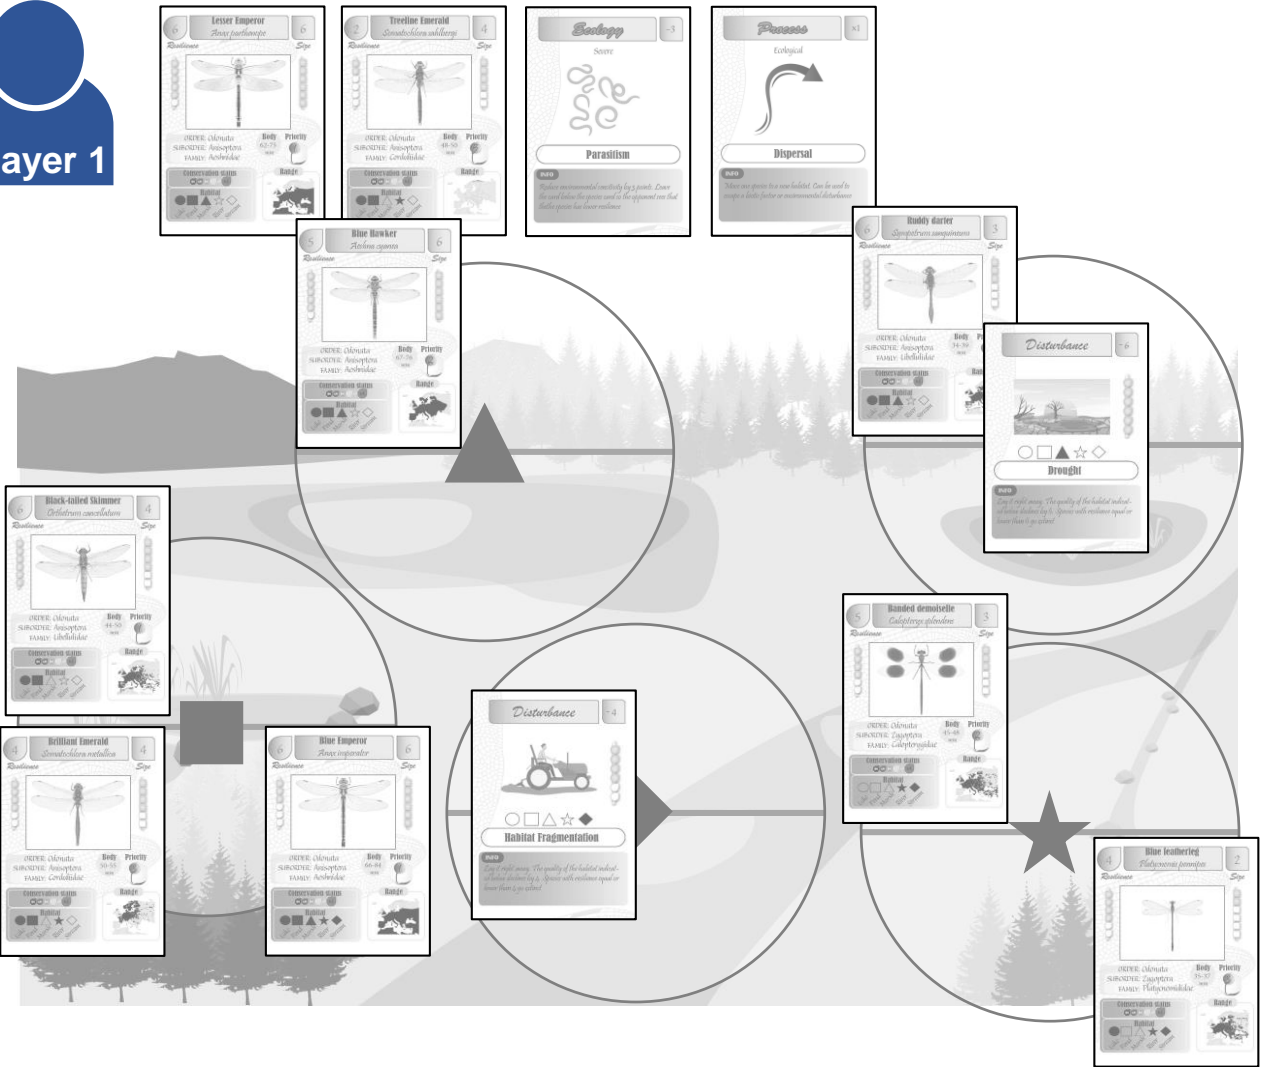

Player 2



Habitat occupied

4

Disturbances solved

+2

+4

+6

0

0

0

Conservation priority

6

Dragonfly

Action

Disturbance

1

Gameplay

1 Player 1 rolls the dice and obtain the dragonfly logo

Habitat occupied

2

Disturbances solved

+2

+4

+6

0

1

0

Conservation priority

7

Player 1

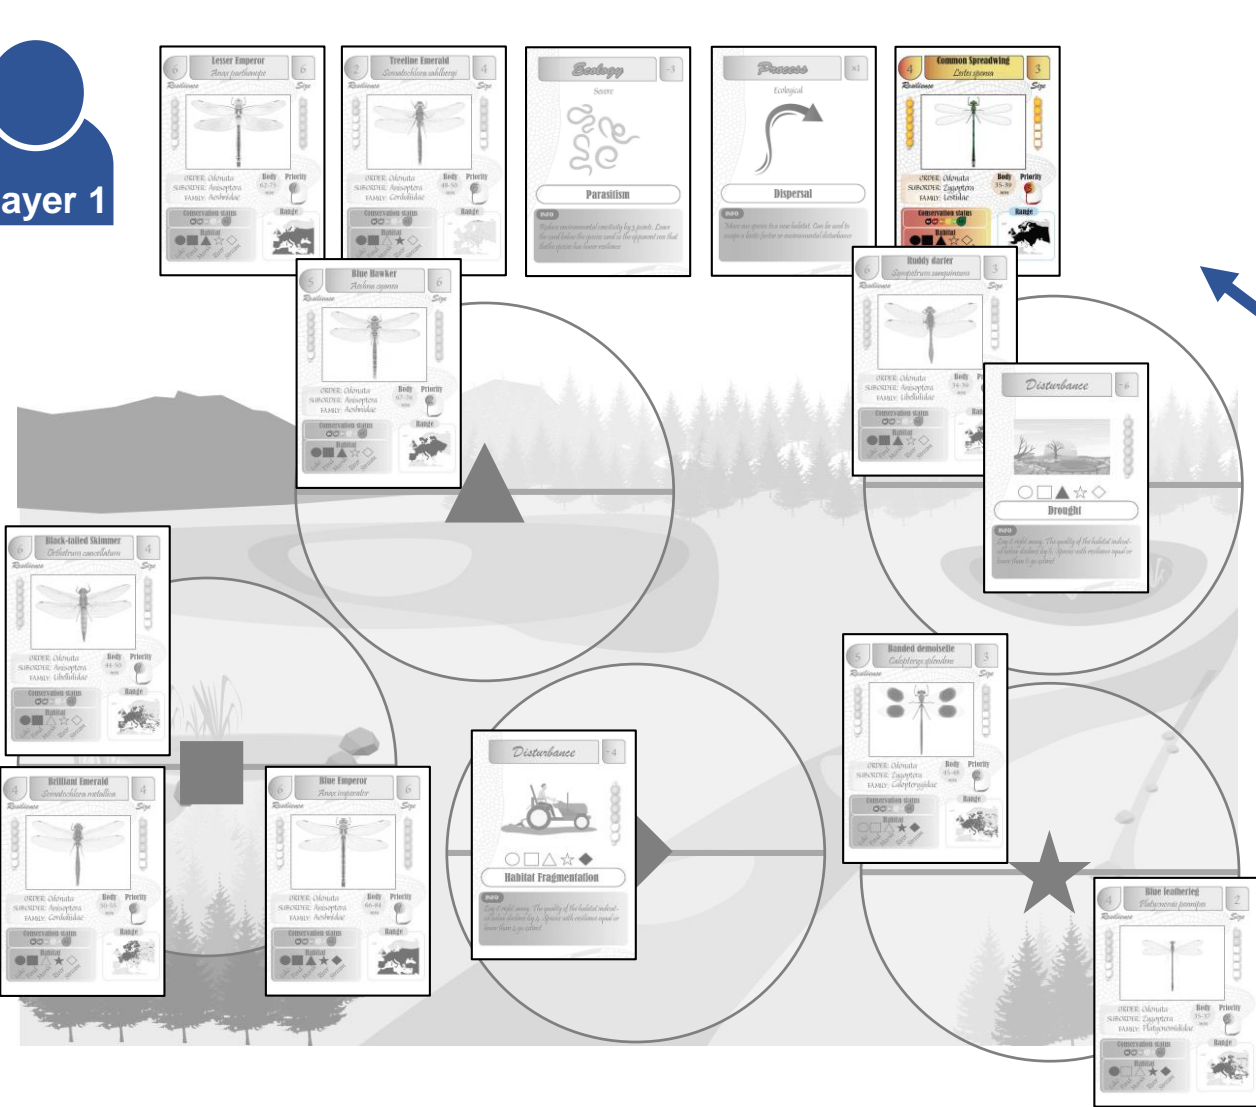

Player 2

Habitat occupied: 4  
Disturbances solved: 0, 0, 0  
Conservation priority: 6

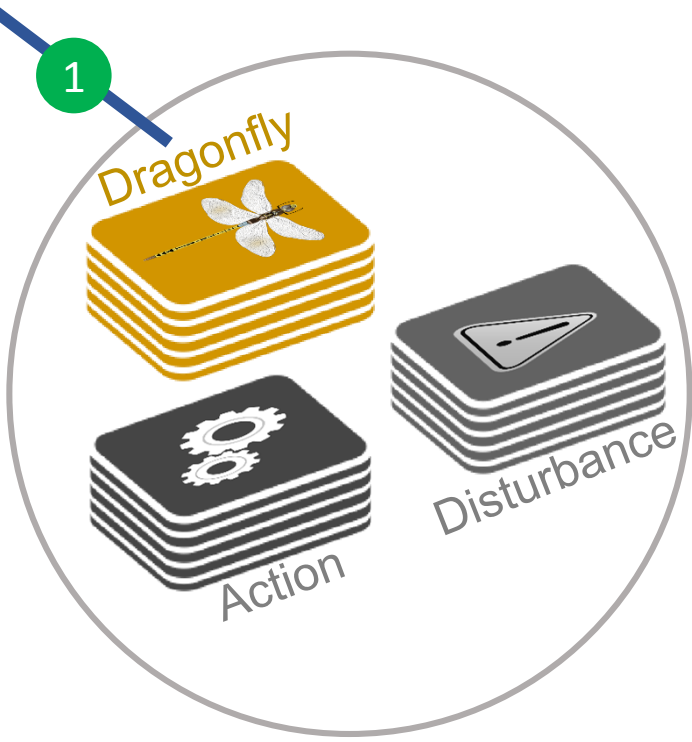

**Gameplay**

1 Player 1 draws a dragonfly card and obtains the 'Common Spreadingwing'

Habitat occupied: 2  
Disturbances solved: 0, 1, 0  
Conservation priority: 7

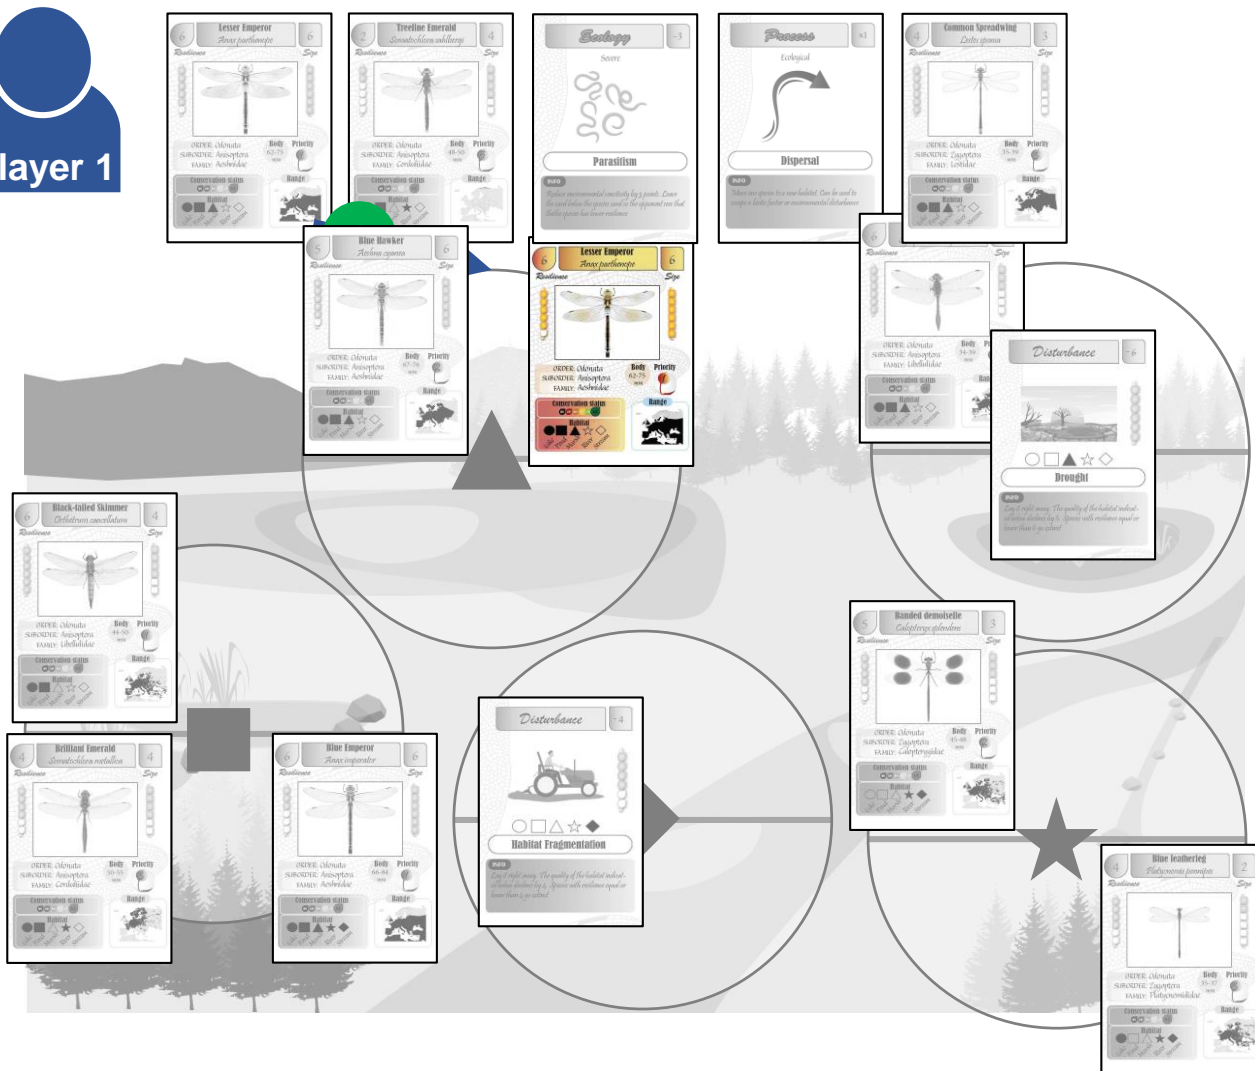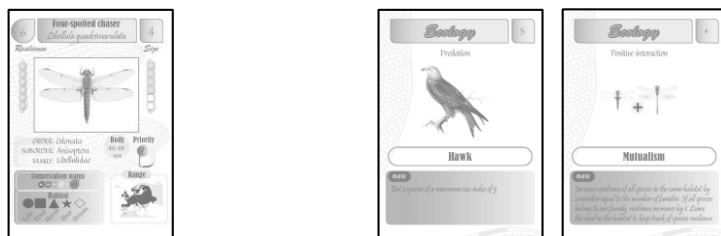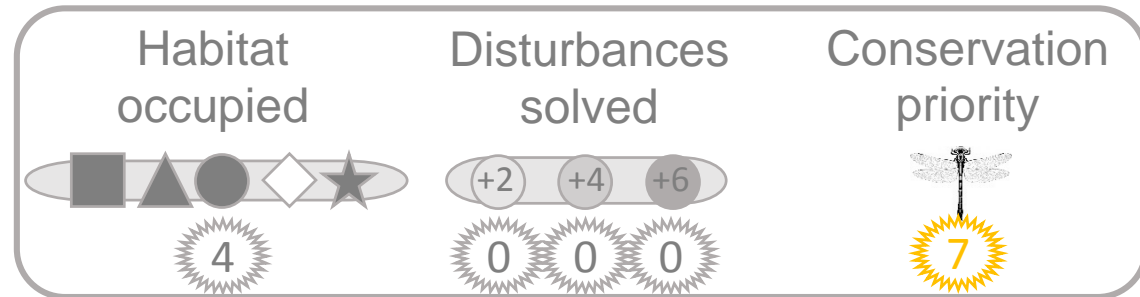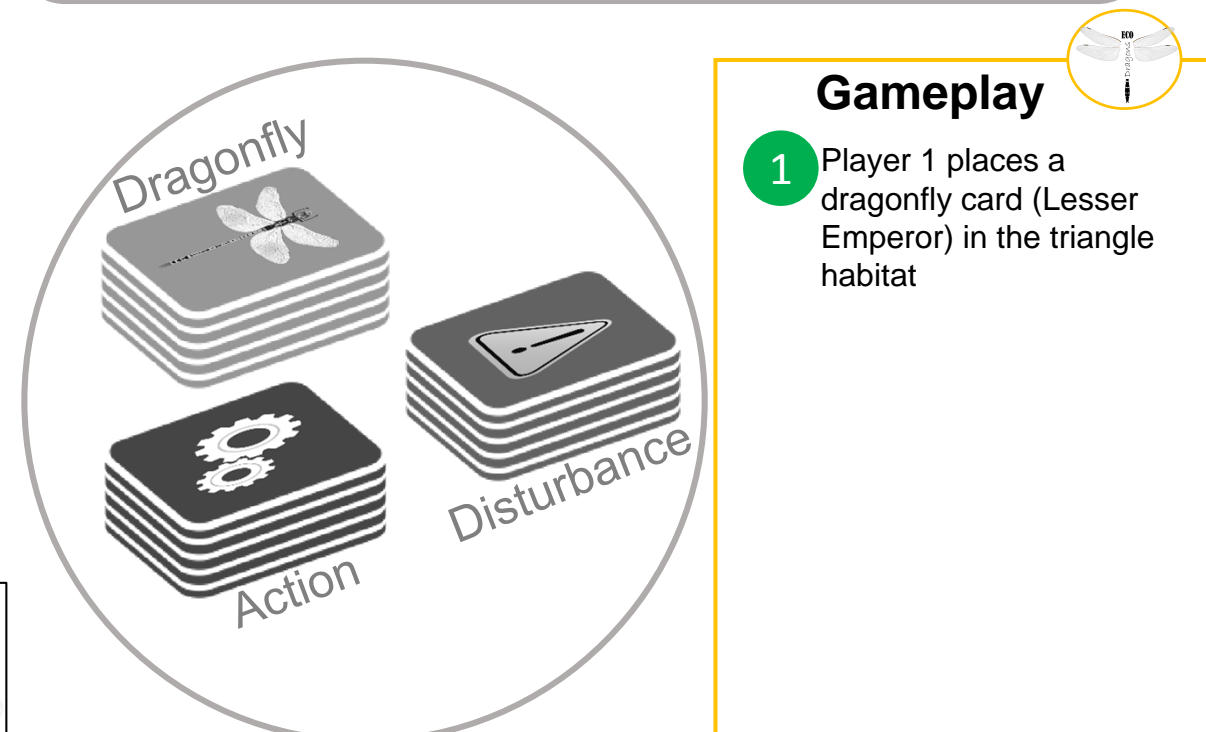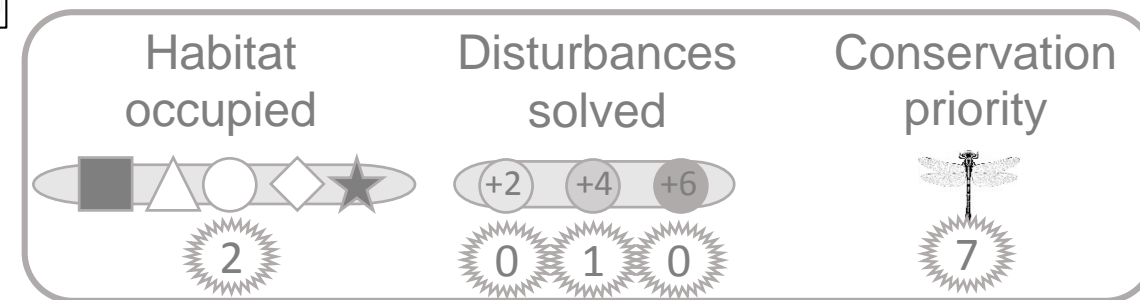

Player 1

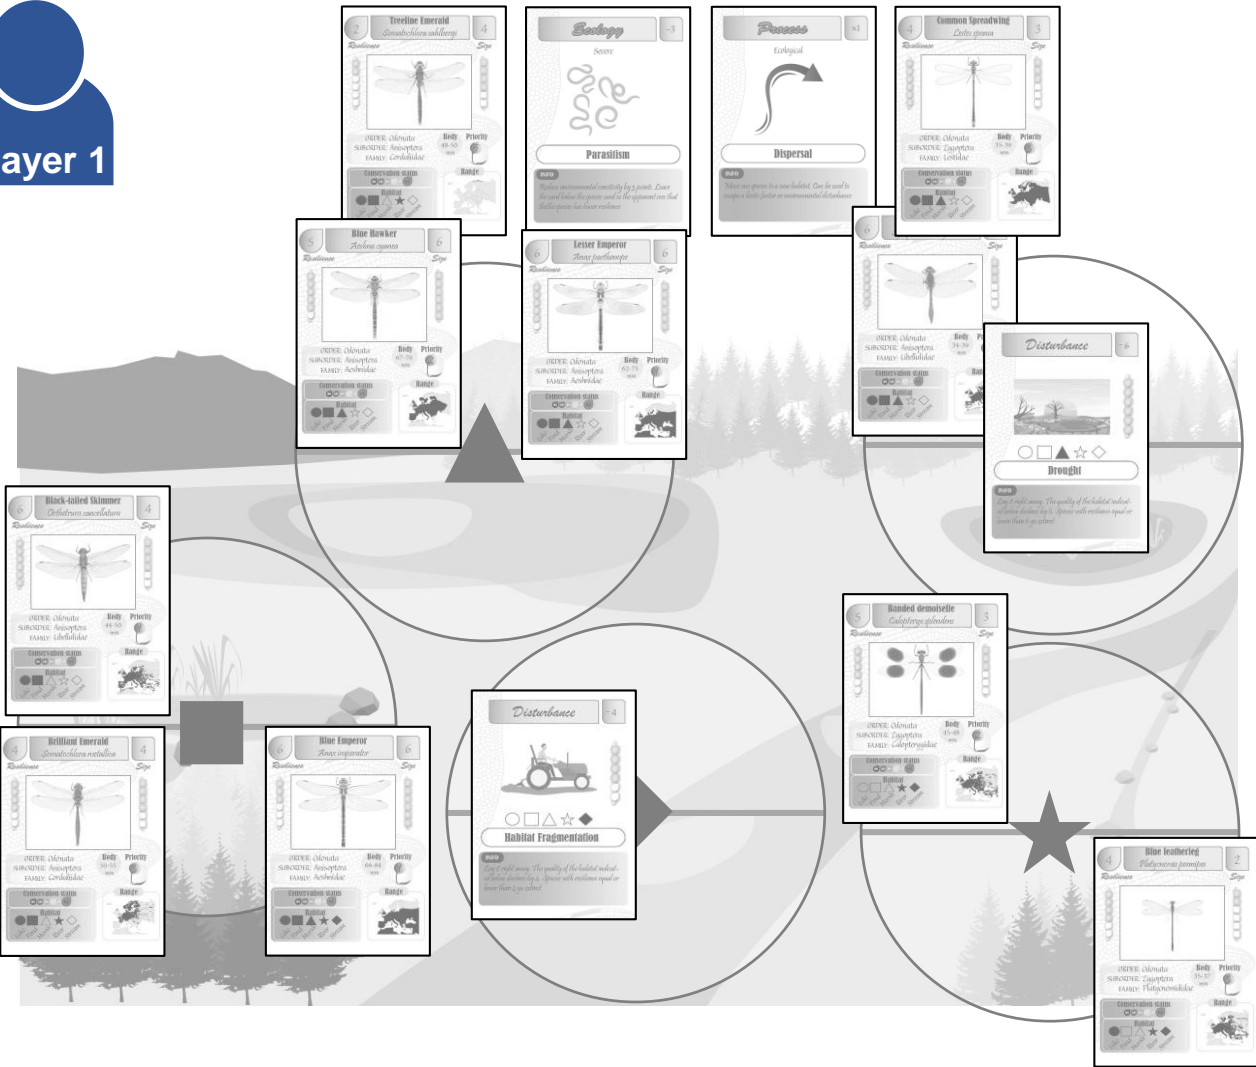

Player 2

Four dragonfly cards and two ecology cards. The dragonfly cards are: Blue Emperor (Anisoptera: Libellulidae), Banded damselfly (Zygoptera: Libellulidae), Blue leatherwing (Anisoptera: Libellulidae), and Blue Emperor (Anisoptera: Libellulidae). The ecology cards are: Parasitism (Ecology) and Mutualism (Ecology).

Habitat occupied: 4  
Disturbances solved: 0, 0, 0  
Conservation priority: 7

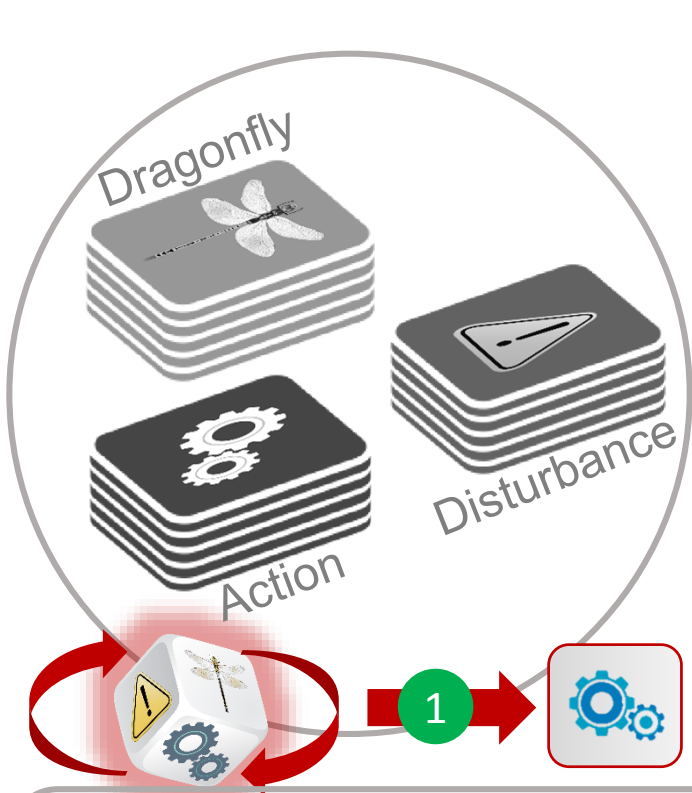

**Gameplay**

1 Player 2 rolls the dice and obtain the action logo

Habitat occupied: 2  
Disturbances solved: 0, 1, 0  
Conservation priority: 7



Player 1

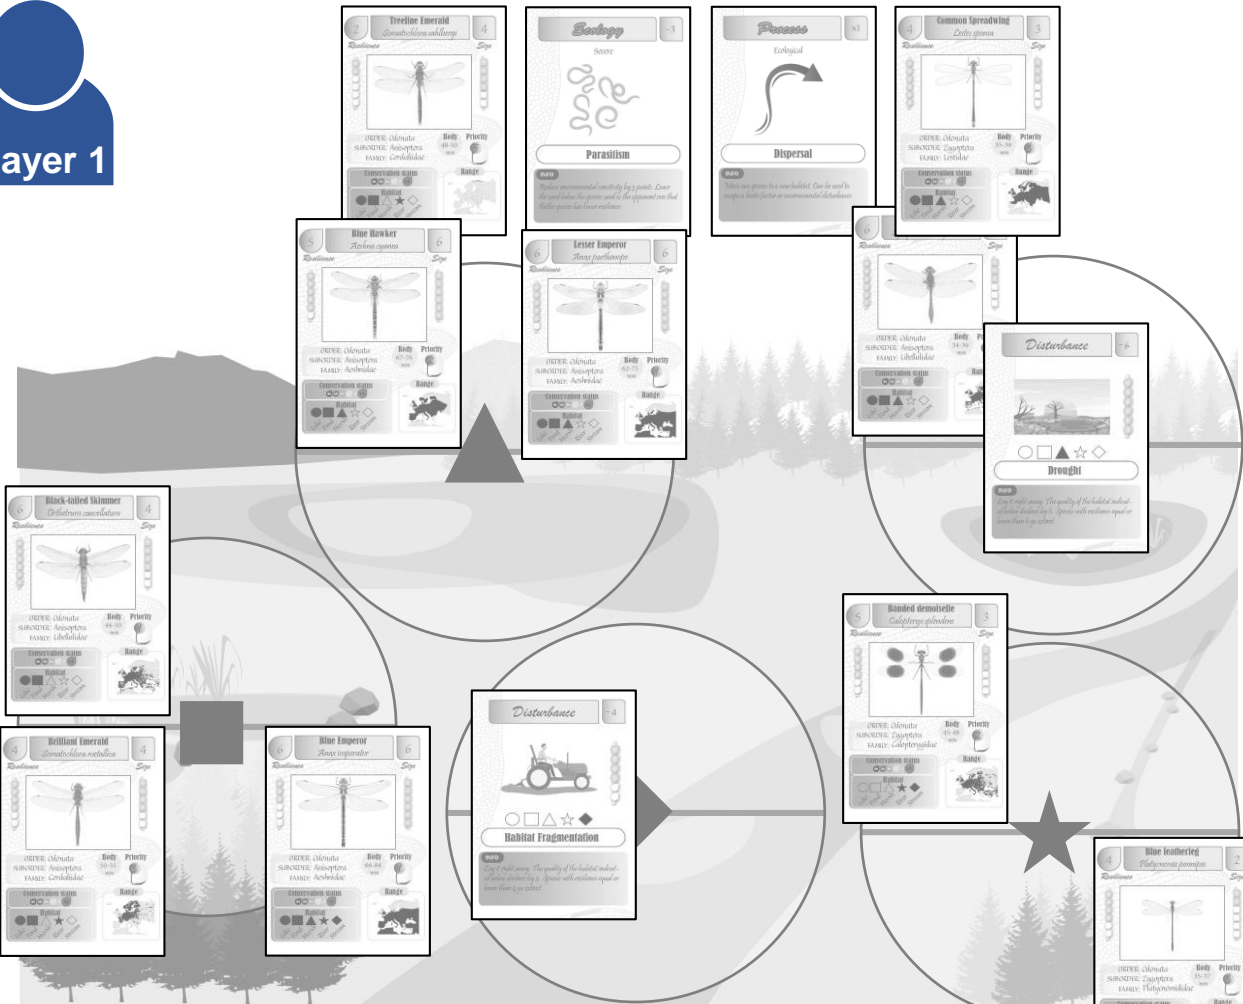

Player 2

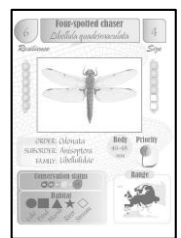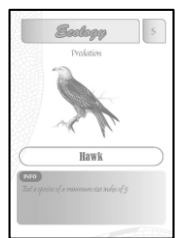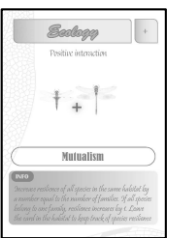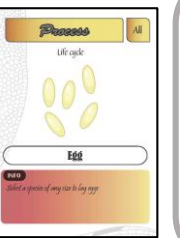

Habitat occupied

4

Disturbances solved

+2

+4

+6

0

0

0

Conservation priority

7

Dragonfly

Action

Disturbance

1

Player 2 draws an action card and receives an 'Egg'

Habitat occupied

2

Disturbances solved

+2

+4

+6

0

1

0

Conservation priority

7



Player 1

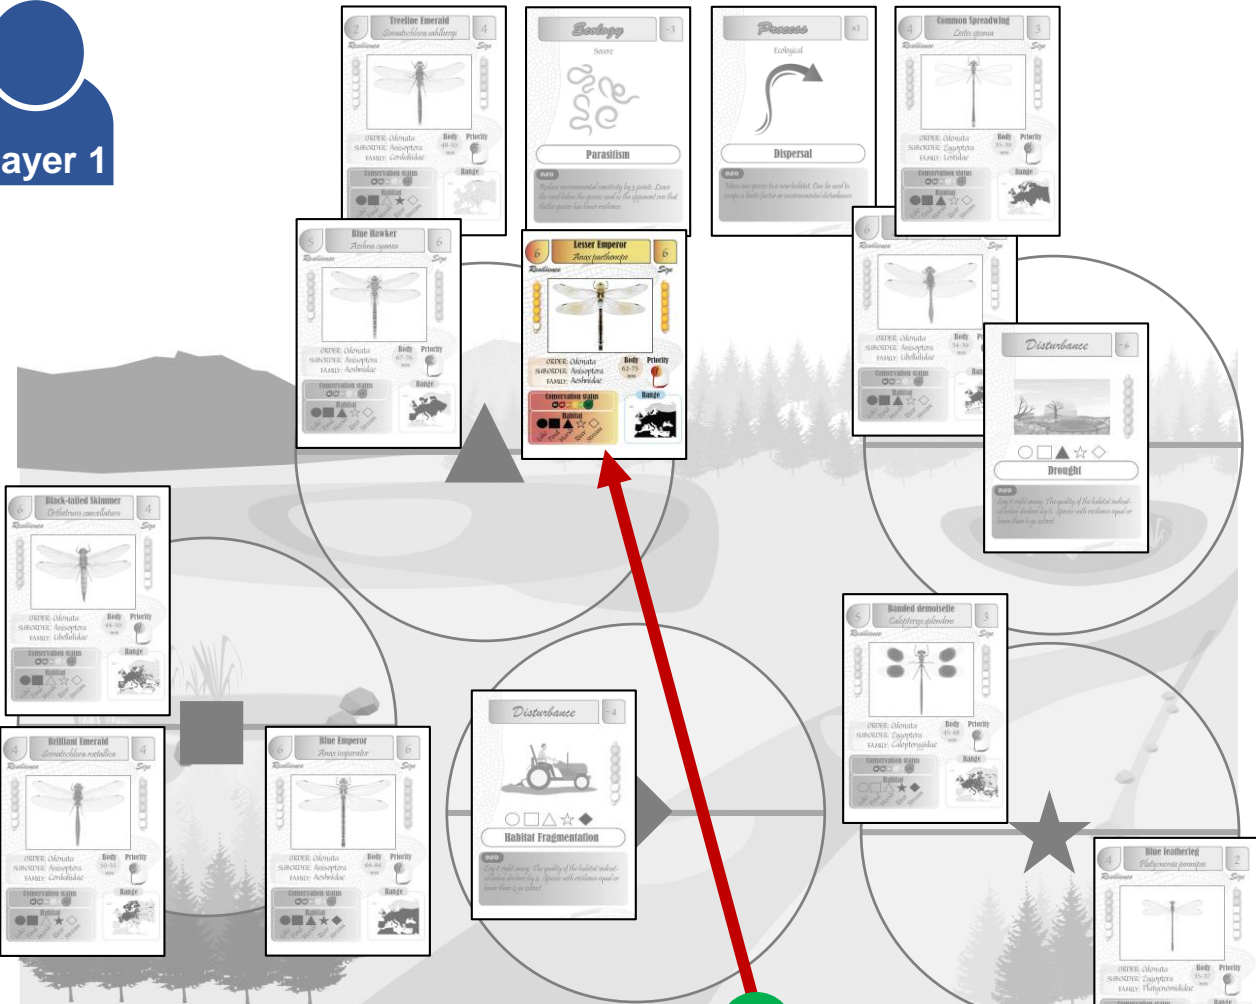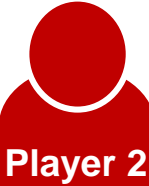

Player 2

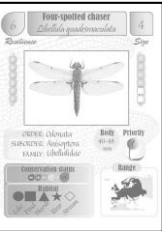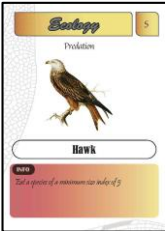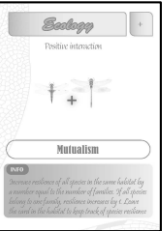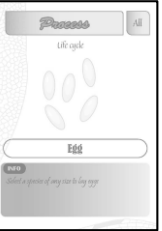

Habitat occupied

4

Disturbances solved

0 0 0

Conservation priority

7

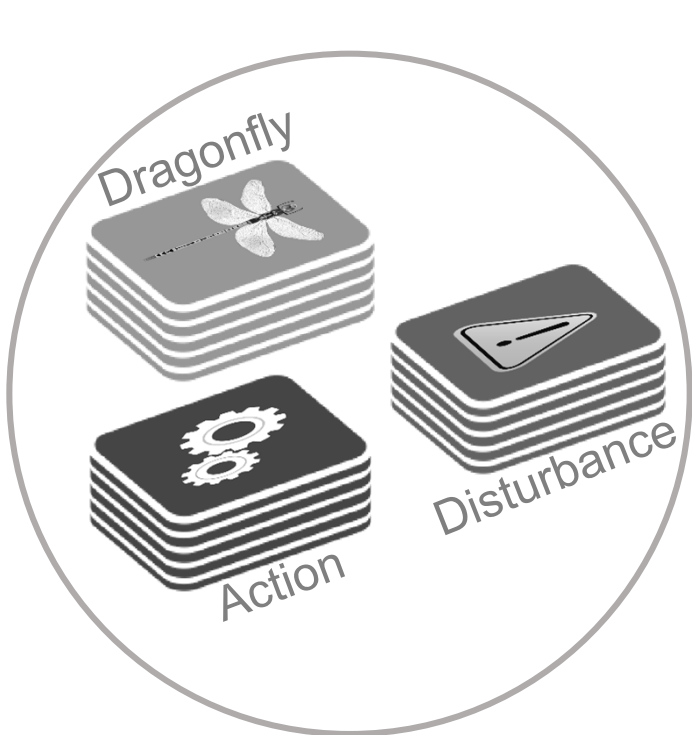

1

Player 2 attempt to use predation (Hawk) on the Lesser Emperor in the triangle habitat.

Habitat occupied

3

Disturbances solved

0 1 0

Conservation priority

7



Player 1

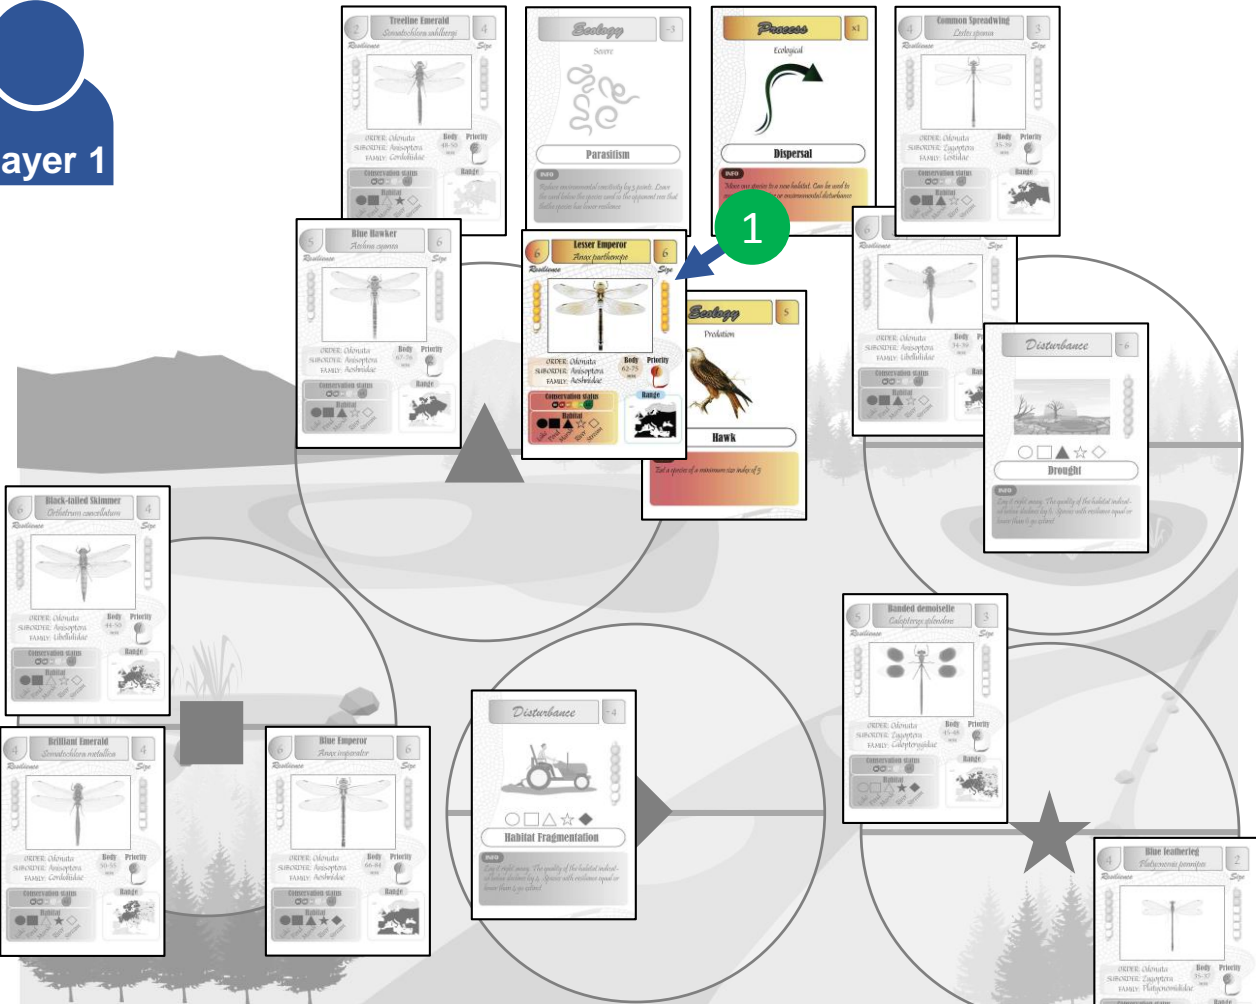

Player 2

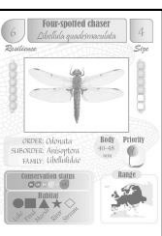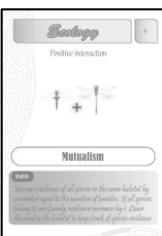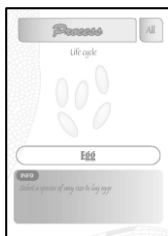

Habitat occupied

4

Disturbances solved

0 0 0

Conservation priority

7



1

**Gameplay**

Player 1 defends the dragonfly using 'Dispersal' and moves the dragonfly to a different habitat

Habitat occupied

2

Disturbances solved

0 1 0

Conservation priority

7



Player 1

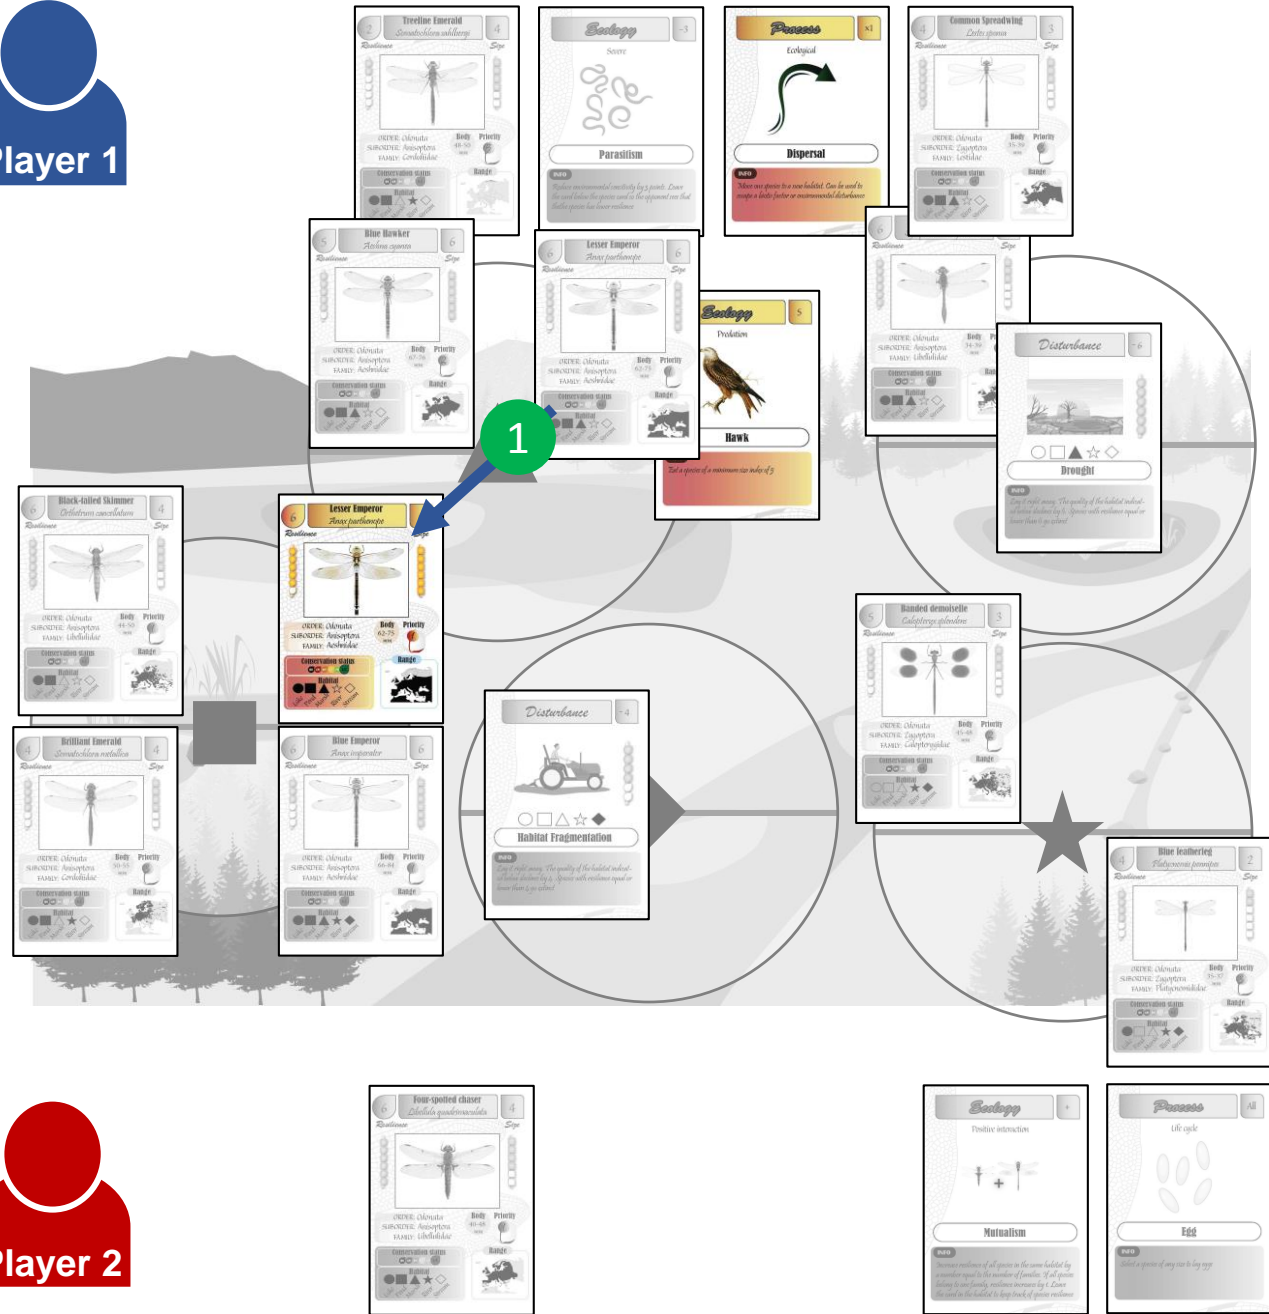

Player 2

Habitat occupied

4

Disturbances solved

+2

+4

+6

0

0

0

Conservation priority

7



1

Player 1 moves the Lesser Emperor to the square habitat

Habitat occupied

2

Disturbances solved

+2

+4

+6

0

1

0

Conservation priority

7





Player 1

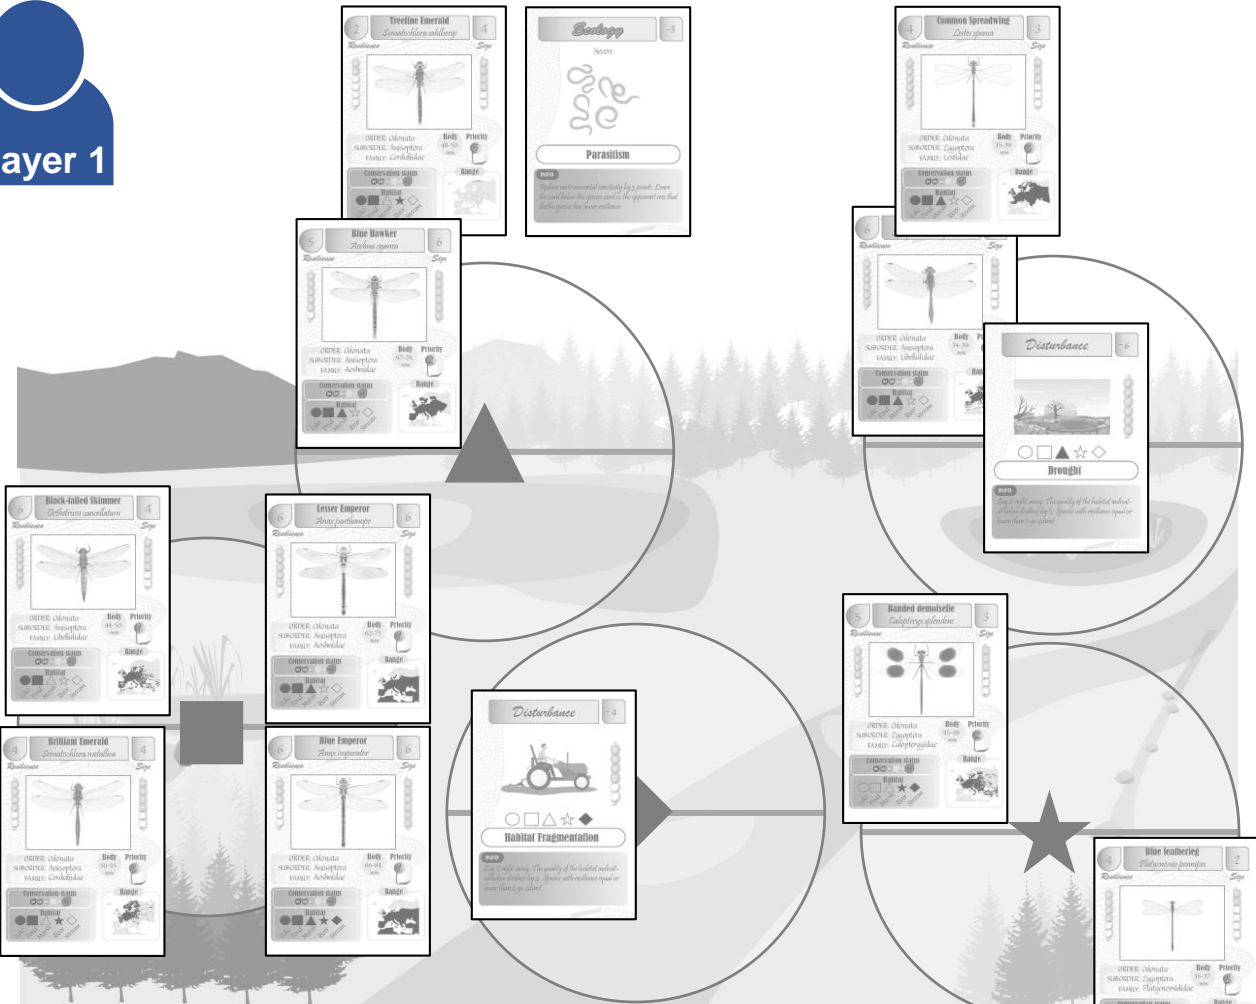

Player 2

Tree-lined stream

*Desmoulinia subulata*

Body Priority: 10-15

Survival: 10-15

Family: Libellulidae

Range: 10-15

Ecology

Positive interaction

Mutualism

Survival: 10-15

Family: Libellulidae

Range: 10-15

Process

Life cycle

Egg

Survival: 10-15

Family: Libellulidae

Range: 10-15

Habitat occupied

4

Disturbances solved

0 0 0

Conservation priority

7

Dragonfly

Action

Disturbance

Habitat occupied

2

Disturbances solved

0 1 0

Conservation priority

7

Gameplay

1 Player 2 draws an action card and receives a conservation card (IUCN)

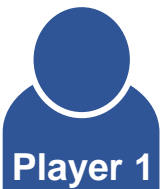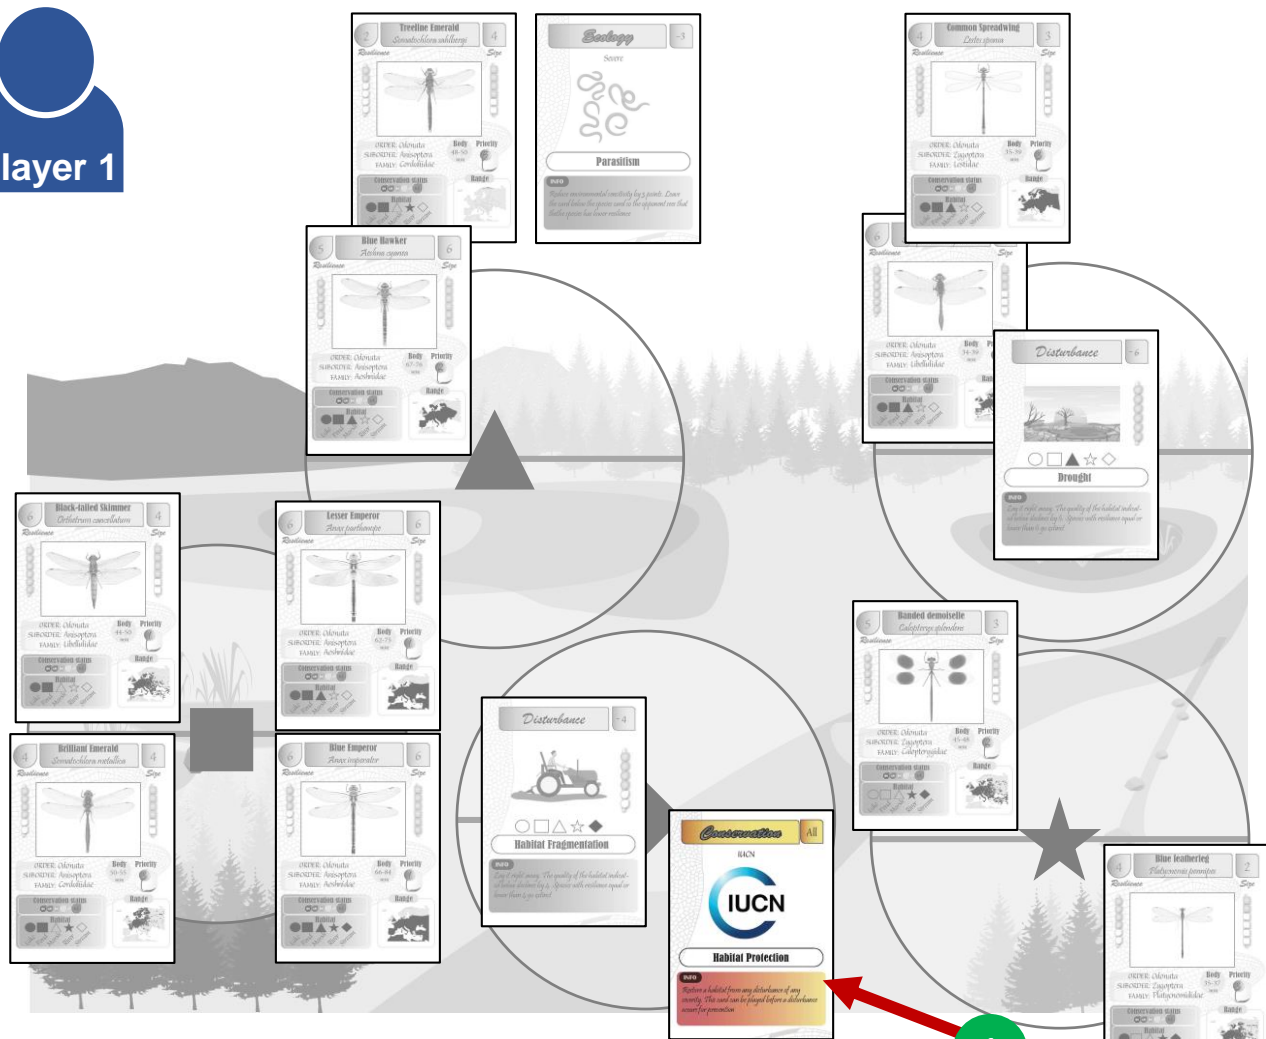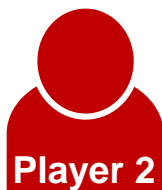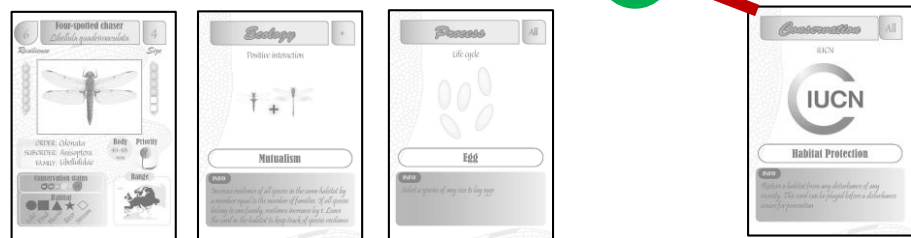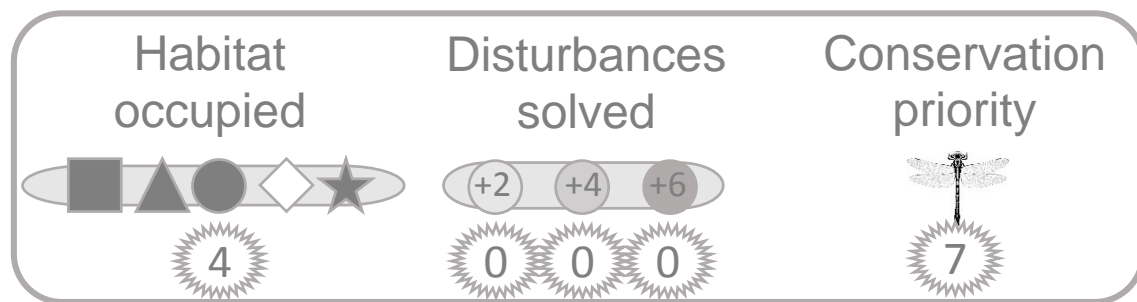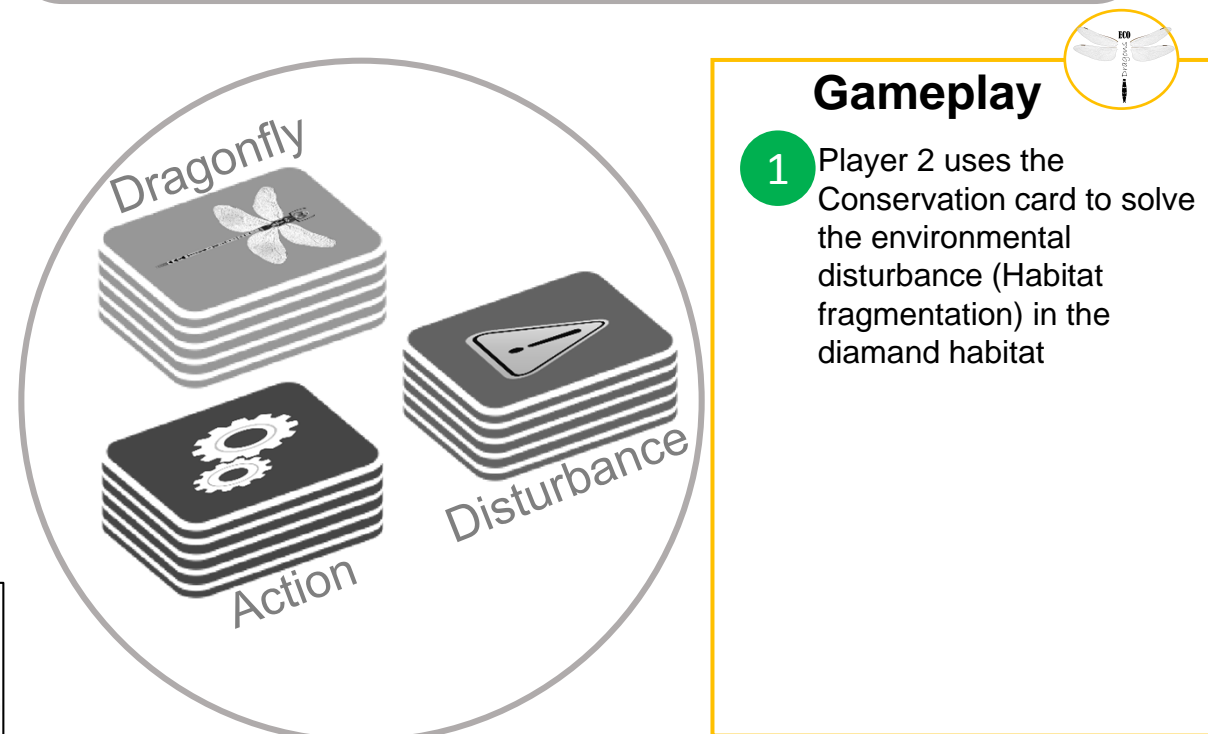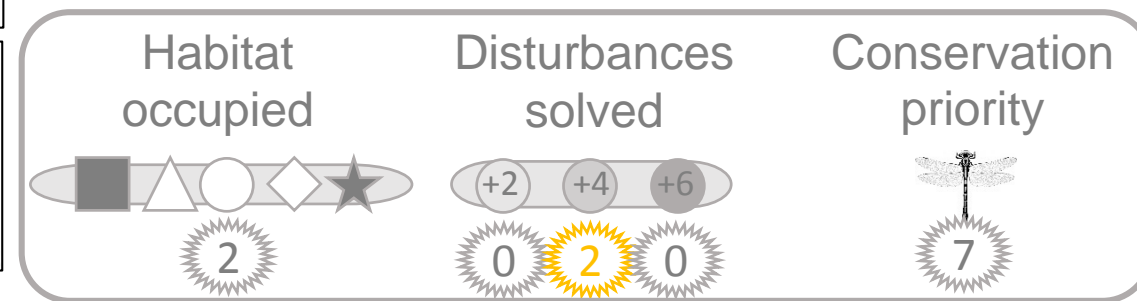

Player 1

Stop the game here

Player 2

Dragonfly cards for Player 2: *Four spotted damselfly*, *Ecology* (Mutualism), *Process* (Egg).

Habitat occupied: 4  
Disturbances solved: 0, 0, 0  
Conservation priority: 7

Dragonfly  
Action  
Disturbance

Gameplay  
1 As the game is long, we stop it here to understand how scoring is calculated at the end of the game

Habitat occupied: 2  
Disturbances solved: 0, 2, 0  
Conservation priority: 7

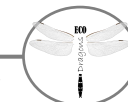

## Gameplay

- 1 At the end of the game, the three scores (habitat, disturbances solved, conservation priority) are used to calculate the final score.
- 2 Each occupied habitat counts as 10
- 3 The total number of points for environmental disturbances depends on the number of disturbances and the level of severity of the disturbance (2 for mild, 4 for strong, and 6 for severe).
- 4 The conservation priority score is the sum of the priority indices of all species occupying a habitat at the end of the game
- 5 In the current game, Player 1 won with 47 points

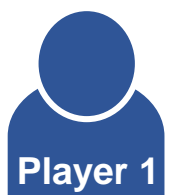

Player 1

Habitat occupied

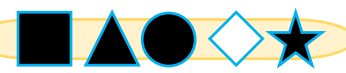

2 4

Disturbances solved

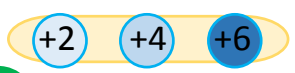

3 0 0 0

Conservation priority

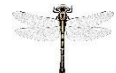

4 7

1

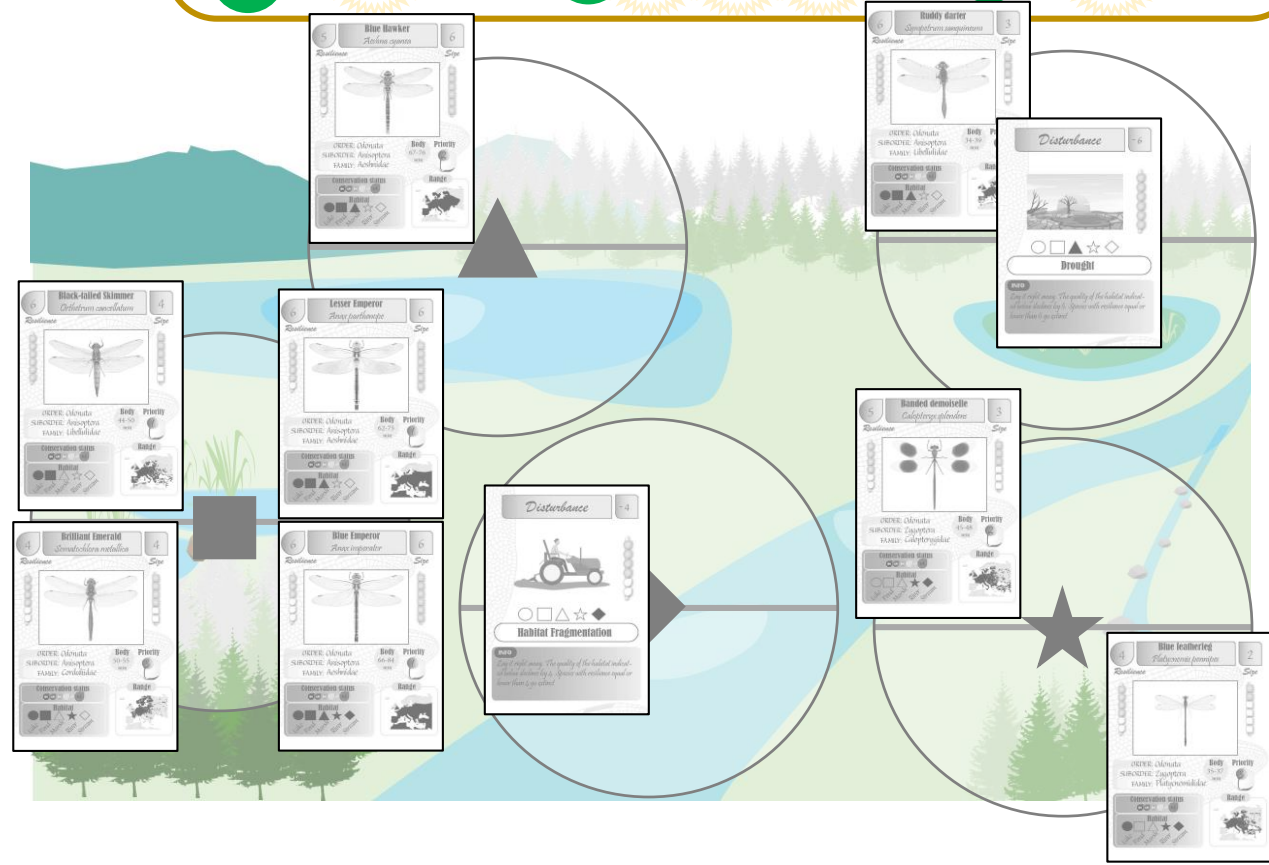

## Final score

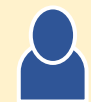

$$40 + 0 + 7 = 47$$

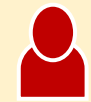

$$30 + 8 + 7 = 45$$

5

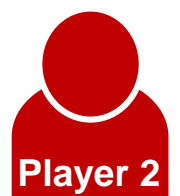

Player 2

Habitat occupied

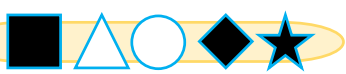

2 3

Disturbances solved

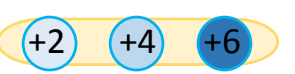

3 0 2 0

Conservation priority

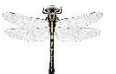

4 7

1
