# Supplementary material for: EcoDragons: A Game for Environmental Education and Public Outreach
Source: MDPI journal article supplement (doi:10.3390/insects12090776), 2021-08-29
Supplement: s1 [file s1]

3

Resilience

**Azure Hawker***Aeshna caerulea*

5

Size

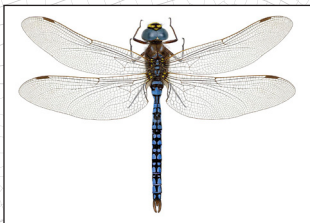

ORDER: Odonata  
 SUBORDER: Anisoptera  
 FAMILY: Aeshnidae

**Body**54-64  
mm**Priority**

4

**Conservation status**

EX CR EN VU NT LC

**Habitat**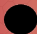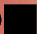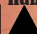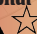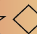

Lake

Pond

Marsh

River

Stream

**Range**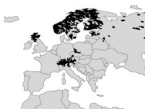

5

Resilience

**Blue Hawker***Aeshna cyanea*

6

Size

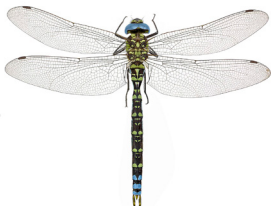

ORDER: Odonata  
 SUBORDER: Anisoptera  
 FAMILY: Aeshnidae

**Body**67-76  
mm**Priority**

2

**Conservation status**EX CR EN VU NT **LC****Habitat**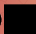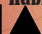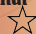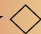

Lake

Pond

Marsh

River

Stream

**Range**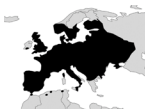

4

Resilience

**Brown Hawker***Aeshna grandis*

6

Size

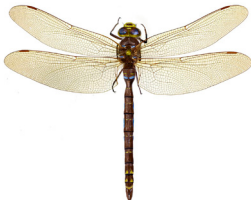

ORDER: Odonata  
 SUBORDER: Anisoptera  
 FAMILY: Aeshnidae

**Body**70-77  
mm**Priority**

3

**Conservation status**

EX CR EN VU NT LC

**Habitat**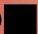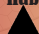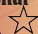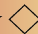

Lake

Pond

Marsh

River

Stream

**Range**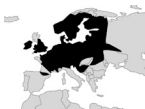

3

**Moorland Hawker***Aeshna juncea*

6

*Resilience**Size*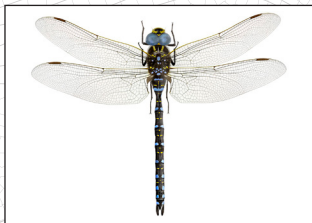

ORDER: Odonata  
 SUBORDER: Anisoptera  
 FAMILY: Aeshnidae

**Body**65-80  
mm**Priority**

4

**Conservation status**EX CR EN VU NT **LC****Habitat**

Lake

Pond

Marsh

River

Stream

**Range**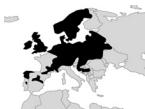

6

# Vagrant Emperor

*Anax ephippiger*

6

Resilience

Size

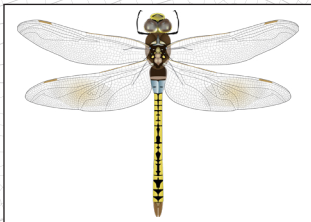

ORDER: Odonata  
SUBORDER: Anisoptera  
FAMILY: Aeshnidae

Body

61-70  
mm

Priority

1

## Conservation status

EX CR EN VU NT LC

## Habitat



Lake

Pond

Marsh

River

Stream

## Range

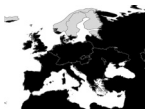

6

**Blue Emperor***Anax imperator*

6

*Resilience**Size*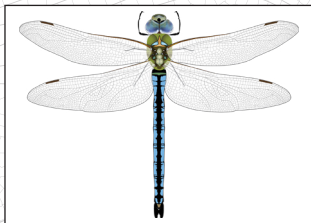

ORDER: Odonata  
 SUBORDER: Anisoptera  
 FAMILY: Aeshnidae

**Body**66-84  
mm**Priority**

1

**Conservation status**EX CR EN VU NT **LC****Habitat**

● ■ ▲ ★ ◆  
 Lake Pond Marsh River Stream

**Range**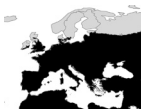

6

Resilience

**Lesser Emperor***Anax parthenope*

6

Size

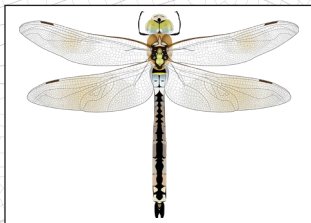

ORDER: Odonata  
 SUBORDER: Anisoptera  
 FAMILY: Aeshnidae

**Body**62-75  
mm**Priority**

1

**Conservation status**EX CR EN VU NT **LC****Habitat**

Lake

Pond

Marsh

River

Stream

**Range**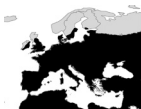

5

**Banded Demoiselle***Calopteryx splendens*

3

Resilience

Size

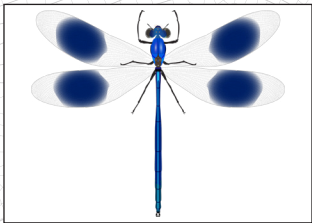

ORDER: Odonata

SUBORDER: Zygoptera

FAMILY: Calopterygidae

Body

45-48  
mm

Priority

2

**Conservation status**

EX CR EN VU NT LC

**Habitat**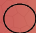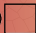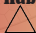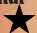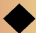

Lake

Pond

Marsh

River

Stream

**Range**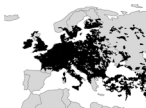

4

**Beautiful Demoiselle***Calopteryx virgo*

3

*Resilience**Size*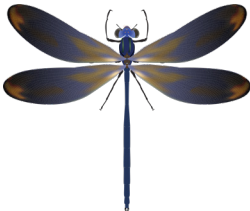

ORDER: Odonata

SUBORDER: Zygoptera

FAMILY: Calopterygidae

**Body**45-49  
mm**Priority**

3

**Conservation status**EX CR EN VU NT **LC****Habitat**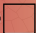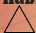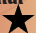

Lake

Pond

Marsh

River

Stream

**Range**

4

Resilience

# Green Emerald

*Chalcolestes viridis*

3

Size

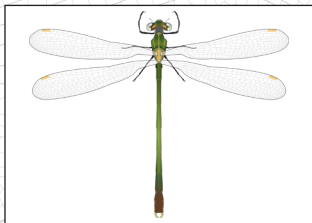

ORDER: Odonata  
SUBORDER: Zygoptera  
FAMILY: Lestidae

Body

33-37  
mm

Priority

3

## Conservation status

EX CR EN VU NT LC

## Habitat

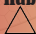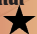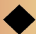

Lake

Pond

Marsh

River

Stream

## Range

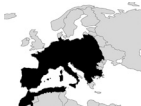

4

Resilience

## Dark Bluet

*Coenagrion armatum*

2

Size

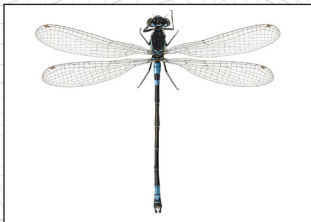

ORDER: Odonata

SUBORDER: Zygoptera

FAMILY: Coenagrionidae

Body

31-34  
mm

Priority

3

## Conservation status

EX CR EN VU NT LC

## Habitat



Lake

Pond

Marsh

River

Stream

## Range

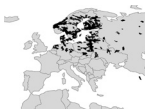

3

**Spearhead Fluet***Coenagrion hastulatum*

2

*Resilience**Size*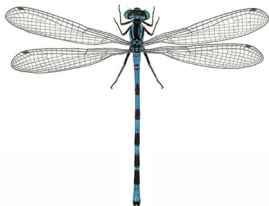

ORDER: Odonata

SUBORDER: Zygoptera

FAMILY: Coenagrionidae

**Body**31-33  
mm**Priority**

4

**Conservation status**

EX

CR

EN

VU

NT

LC

**Habitat**

Lake

Pond

Marsh

River

Stream

**Range**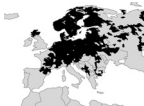

1

Resilience

**Siberian Bluet***Coenagrion hylas*

2

Size

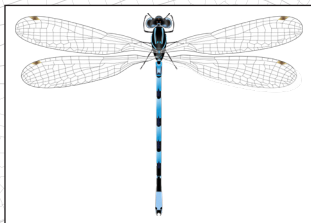

ORDER: Odonata

SUBORDER: Zygoptera

FAMILY: Coenagrionidae

**Body**33-38  
mm**Priority**

8

**Conservation status**EX CR EN **VU** NT LC**Habitat**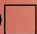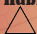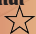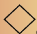

Lake

Pond

Marsh

River

Stream

**Range**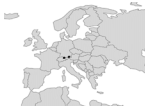

4

Resilience

## Arctic Bluet

*Coenagrion johanssони*

2

Size

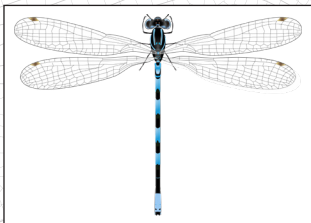

ORDER: Odonata

SUBORDER: Zygoptera

FAMILY: Coenagrionidae

Body

27-30  
mm

Priority

3

## Conservation status

EX CR EN VU NT LC

## Habitat



Lake

Pond

Marsh

River

Stream

## Range

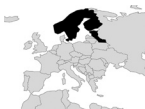

3

Resilience

**Southern Damselfly***Coenagrion mercuriale*

2

Size

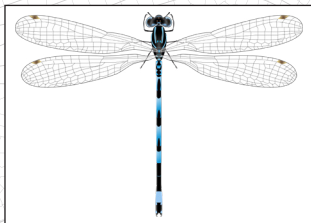

ORDER: Odonata

SUBORDER: Zygoptera

FAMILY: Coenagrionidae

Body

27-31  
mm

Priority

5

**Conservation status**

EX CR EN VU NT LC

**Habitat**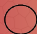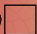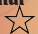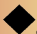

Lake

Pond

Marsh

River

Stream

**Range**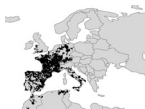

5

Resilience

**Azure Bluet***Coenagrion puella*

2

Size

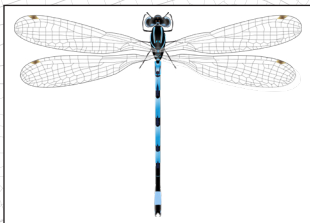

ORDER: Odonata

SUBORDER: Zygoptera

FAMILY: Coenagrionidae

**Body**29-32  
mm**Priority**

2

**Conservation status**

EX

CR

EN

VU

NT

LC

**Habitat**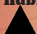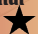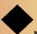

Lake

Pond

Marsh

River

Stream

**Range**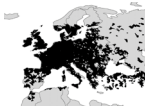

6

Resilience

## Variable Bluet

*Coenagrion pulchellum*

2

Size

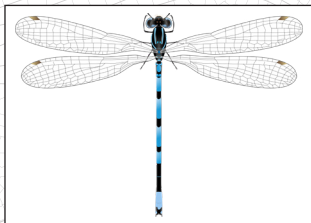

ORDER: Odonata

SUBORDER: Zygoptera

FAMILY: Coenagrionidae

Body

34-38  
mm

Priority

1

## Conservation status

EX CR EN VU NT LC

## Habitat

Lake Pond Marsh River Stream

## Range

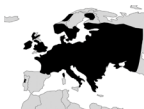

5

Resilience

**Dainty Damselfly***Coenagrion scitulum*

2

Size

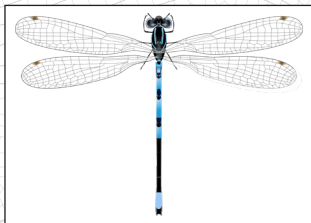

ORDER: Odonata

SUBORDER: Zygoptera

FAMILY: Coenagrionidae

Body

30-33  
mm

Priority

2

**Conservation status**

EX

CR

EN

VU

NT

LC

**Habitat**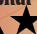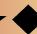

Lake

Pond

Marsh

River

Stream

**Range**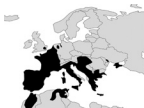

3

**Sombre Goldenring***Cordulegaster bidentata*

6

Resilience

Size

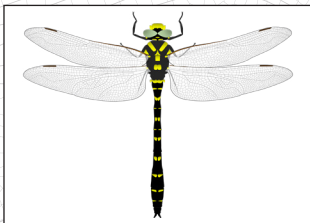

ORDER: Odonata

SUBORDER: Anisoptera

FAMILY: Cordulegastridae

Body

69-78  
mm

Priority

5

**Conservation status**

EX

CR

EN

VU

NT

LC

**Habitat**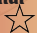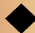

Lake

Pond

Marsh

River

Stream

**Range**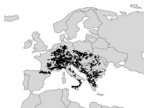

3

# Common Goldenring

*Cordulegaster boltonii*

6

Resilience

Size

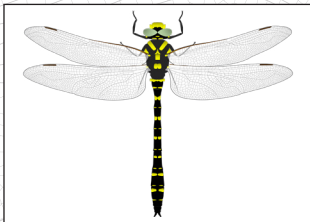

ORDER: Odonata

SUBORDER: Anisoptera

FAMILY: Cordulegastridae

Body

74-80  
mm

Priority

4

## Conservation status

EX CR EN VU NT LC

## Habitat

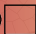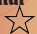

Lake

Pond

Marsh

River

Stream

## Range

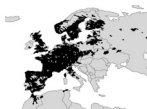

5

**Common Blue Damselfly***Enallagma cyathigerum*

2

Resilience

Size

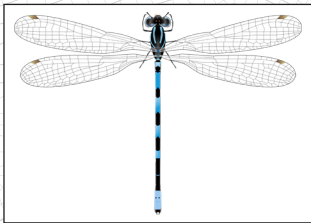

ORDER: Odonata

SUBORDER: Zygoptera

FAMILY: Coenagrionidae

Body

29-36  
mm

Priority

2

**Conservation status**

EX CR EN VU NT LC

**Habitat**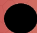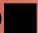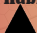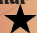

Lake

Pond

Marsh

River

Stream

**Range**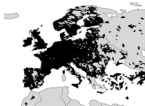

6

**Goblet-Marked Damselfly***Erythromma lindenii*

2

Resilience

Size

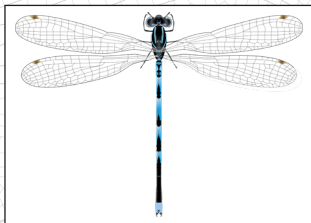

ORDER: Odonata  
 SUBORDER: Zygoptera  
 FAMILY: Coenagrionidae

**Body**30-36  
mm**Priority**

1

**Conservation status**EX CR EN VU NT **Lc****Habitat**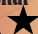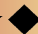

Lake

Pond

Marsh

River

Stream

**Range**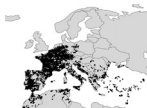

3

**Pronged Clubtail***Gomphus graslinii*

4

*Resilience**Size*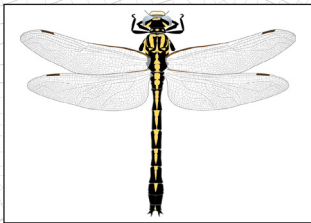

ORDER: Odonata

SUBORDER: Anisoptera

FAMILY: Gomphidae

**Body**47-50  
mm**Priority**

5

**Conservation status**

EX

CR

EN

VU

NT

LC

**Habitat**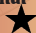

Lake

Pond

Marsh

River

Stream

**Range**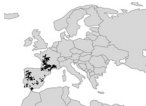

6

# Common Bluetail

*Ischnura elegans*

1

Resilience

Size

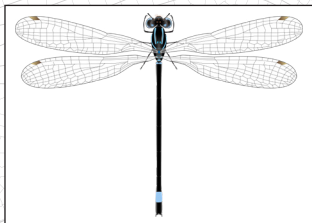

ORDER: Odonata  
 SUBORDER: Zygoptera  
 FAMILY: Coenagrionidae

Body  
 30-34  
 mm

Priority

1

## Conservation status

EX CR EN VU NT LC

## Habitat

● Lake  
 ■ Pond  
 ▲ Marsh  
 ★ River  
 ◆ Stream

## Range

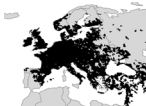

3

Resilience

## Island Bluetail

*Ischnura genei*

1

Size

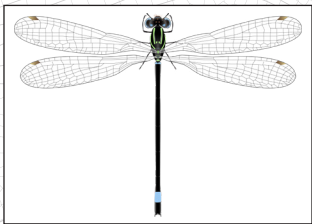

ORDER: Odonata

SUBORDER: Zygoptera

FAMILY: Coenagrionidae

Body

29-32  
mm

Priority

4

## Conservation status

EX CR EN VU NT LC

## Habitat

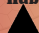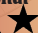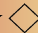

Lake

Pond

Marsh

River

Stream

## Range

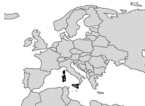

5

Resilience

## Small Bluetail

*Ischnura pumilio*

1

Size

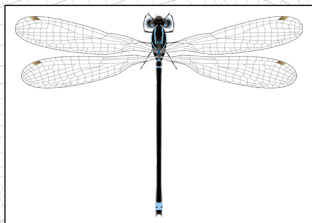

ORDER: Odonata

SUBORDER: Zygoptera

FAMILY: Coenagrionidae

Body

26-31  
mm

Priority

2

## Conservation status

EX CR EN VU NT LC

## Habitat

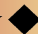

Lake

Pond

Marsh

River

Stream

## Range

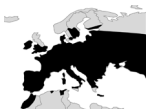

4

**Migrant Spreadwing***Lestes barbarus*

3

*Resilience**Size*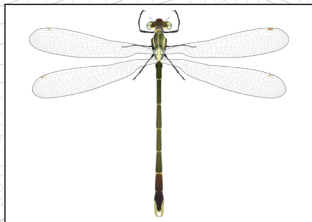

ORDER: Odonata  
 SUBORDER: Zygoptera  
 FAMILY: Lestidae

**Body**40-45  
mm**Priority**

3

**Conservation status**EX CR EN VU NT **LC****Habitat**

Lake

Pond

Marsh

River

Stream

**Range**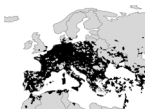

4

Resilience

**Dusky Emerald***Lestes macrostigma*

3

Size

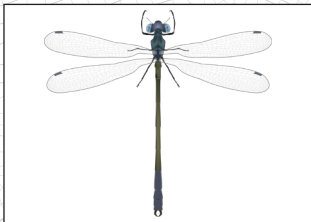

ORDER: Odonata  
 SUBORDER: Zygoptera  
 FAMILY: Lestidae

**Body**39-48  
mm**Priority**

5

**Conservation status**

EX

CR

EN

**VU**

NT

LC

**Habitat**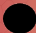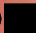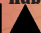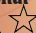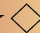

Lake

Pond

Marsh

River

Stream

**Range**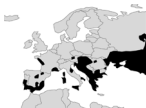

4

**Common Spreadwing***Lestes sponsa*

3

Resilience

Size

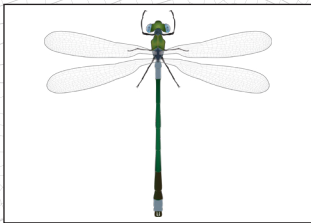

ORDER: Odonata  
 SUBORDER: Zygoptera  
 FAMILY: Lestidae

**Body**35-39  
mm**Priority**

3

**Conservation status**

EX

CR

EN

VU

NT

LC

**Habitat**

Lake

Pond

Marsh

River

Stream

**Range**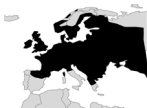

6

**Broad-Bodied Chaser***Libellula depressa*

4

*Resilience**Size*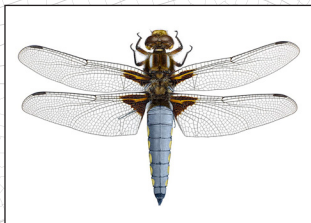

ORDER: Odonata

SUBORDER: Anisoptera

FAMILY: Libellulidae

**Body**39-48  
mm**Priority**

1

**Conservation status**EX CR EN VU NT **LC****Habitat**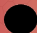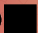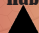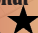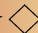

Lake

Pond

Marsh

River

Stream

**Range**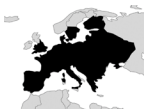

6

Resilience

# Blue Chaser

*Libellula fulva*

4

Size

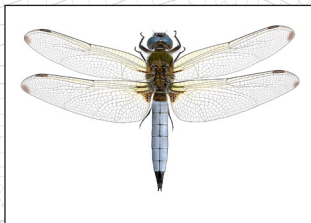

ORDER: Odonata  
SUBORDER: Anisoptera  
FAMILY: Libellulidae

Body

42-45  
mm

Priority

1

## Conservation status

EX

CR

EN

VU

NT

LC

## Habitat



Lake

Pond

Marsh

River

Stream

## Range

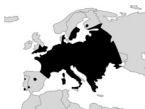

6

**Four-Spotted Chaser***Libellula quadrimaculata*

4

Resilience

Size

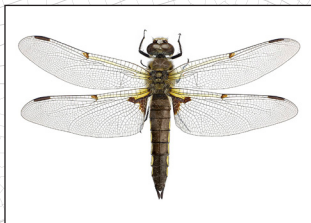

ORDER: Odonata

SUBORDER: Anisoptera

FAMILY: Libellulidae

Body

40-48  
mm

Priority

1

**Conservation status**

EX

CR

EN

VU

NT

LC

**Habitat**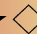

Lake

Pond

Marsh

River

Stream

**Range**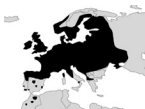

1

Resilience

# Pygmy Damselfly

*Nehalennia speciosa*

2

Size

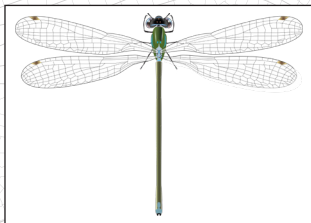

ORDER: Odonata

SUBORDER: Zygoptera

FAMILY: Coenagrionidae

Body

24-26  
mm

Priority

7

## Conservation status

EX CR EN VU NT LC

## Habitat

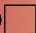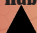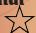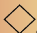

Lake

Pond

Marsh

River

Stream

## Range

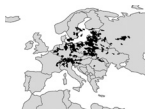

3

**Green-Eyed Hooktail***Onychogomphus forcipatus*

4

*Resilience**Size*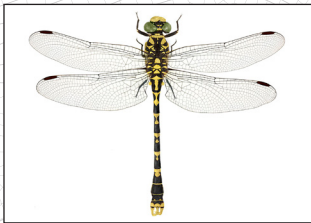

ORDER: Odonata

SUBORDER: Anisoptera

FAMILY: Gomphidae

**Body**46-50  
mm**Priority**

4

**Conservation status**EX CR EN VU NT **LC****Habitat**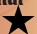

Lake

Pond

Marsh

River

Stream

**Range**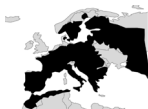

3

Resilience

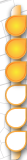

## Green Gomphid

*Ophiogomphus cecilia*

4

Size

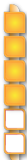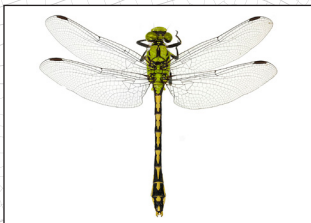

ORDER: Odonata

SUBORDER: Anisoptera

FAMILY: Gomphidae

Body

50-60  
mm

Priority

4

## Conservation status

EX CR EN VU NT **LC**

## Habitat



Lake

Pond

Marsh

River

Stream

## Range

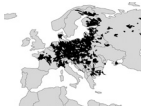

6

# White-Tailed Skimmer

*Orthetrum albistylum*

4

Resilience

Size

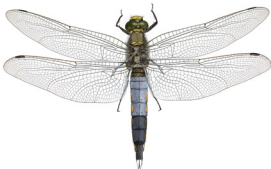

ORDER: Odonata

SUBORDER: Anisoptera

FAMILY: Libellulidae

Body

45-50  
mm

Priority

1

## Conservation status

EX

CR

EN

VU

NT

LC

## Habitat



Lake

Pond

Marsh

River

Stream

## Range

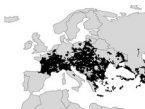

6

**Black-Tailed Skimmer***Orthetrum cancellatum*

4

*Resilience**Size*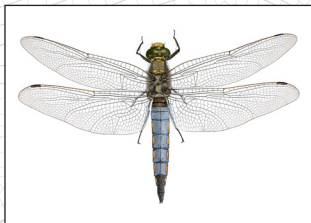

ORDER: Odonata

SUBORDER: Anisoptera

FAMILY: Libellulidae

**Body**44-50  
mm**Priority**

1

**Conservation status**

EX

CR

EN

VU

NT

LC

**Habitat**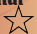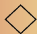

Lake

Pond

Marsh

River

Stream

**Range**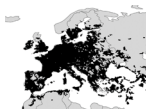

6

**Keeled Skimmer***Orthetrum coerulescens*

4

*Resilience**Size*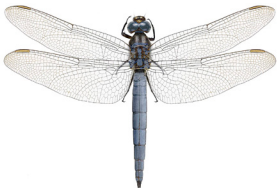

ORDER: Odonata

SUBORDER: Anisoptera

FAMILY: Libellulidae

**Body**36-45  
mm**Priority**

1

**Conservation status**

EX CR EN VU NT LC

**Habitat**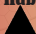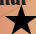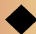

Lake

Pond

Marsh

River

Stream

**Range**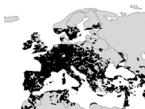

4

# White Featherleg

*Platycnemis latipes*

2

Resilience

Size

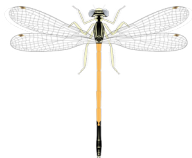

ORDER: Odonata

SUBORDER: Zygoptera

FAMILY: Platycnemididae

Body

33-37  
mm

Priority

3

## Conservation status

EX CR EN VU NT LC

## Habitat

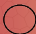

Lake

Pond

Marsh

River

Stream

## Range

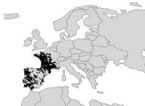

4

# Orange Featherleg

*Platycnemis latipes*

2

Resilience

Size

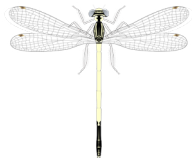

ORDER: Odonata

SUBORDER: Zygoptera

FAMILY: Platycnemididae

Body

34-37  
mm

Priority

3

## Conservation status

EX CR EN VU NT LC

## Habitat



Lake

Pond

Marsh

River

Stream

## Range

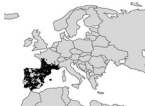

4

Resilience

## Blue Featherleg

*Platycnemis pennipes*

2

Size

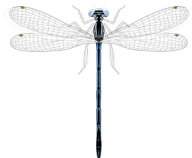

ORDER: Odonata

SUBORDER: Zygoptera

FAMILY: Platycnemididae

Body

35-37  
mm

Priority

3

## Conservation status

EX

CR

EN

VU

NT

LC

## Habitat

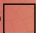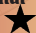

Lake

Pond

Marsh

River

Stream

## Range

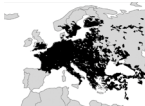

6

# Large Red Damsel

*Pyrrhosoma nymphula*

2

Resilience

Size

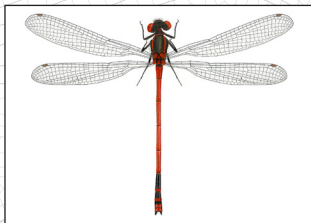

ORDER: Odonata

SUBORDER: Zygoptera

FAMILY: Coenagrionidae

Body

33-36  
mm

Priority

1

## Conservation status

EX CR EN VU NT LC

## Habitat

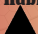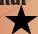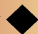

Lake

Pond

Marsh

River

Stream

## Range

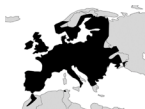

1

Resilience

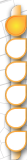

## Alpine Emerald

*Somatochlora alpestris*

4

Size

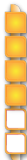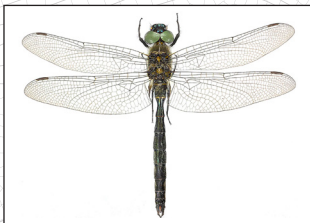

ORDER: Odonata

SUBORDER: Anisoptera

FAMILY: Corduliidae

Body

45-50  
mm

Priority

6

## Conservation status

EX CR EN VU NT LC

## Habitat



Lake

Pond

Marsh

River

Stream

## Range

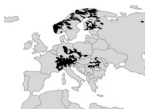

4

Resilience

Brilliant Emerald

*Somatochlora metallica*

4

Size

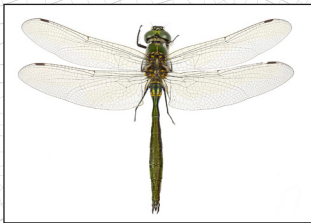

ORDER: Odonata

SUBORDER: Anisoptera

FAMILY: Corduliidae

Body

50-55  
mm

Priority

3

Conservation status

EX CR EN VU NT LC

Habitat

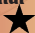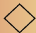

Lake

Pond

Marsh

River

Stream

Range

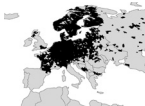

2

Resilience

## Treeline Emerald

*Somatochlora sahlbergi*

4

Size

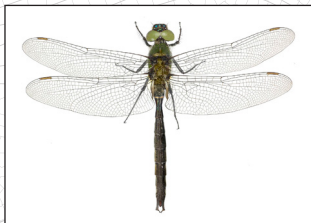

ORDER: Odonata  
 SUBORDER: Anisoptera  
 FAMILY: Corduliidae

Body

48-50  
mm

Priority

5

## Conservation status

EX CR EN VU NT LC

## Habitat

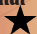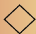

Lake

Pond

Marsh

River

Stream

## Range

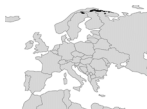

4

**Common Winter Damsel***Sympecma fusca*

3

*Resilience**Size*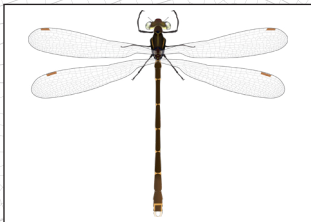

ORDER: Odonata  
 SUBORDER: Zygoptera  
 FAMILY: Lestidae

**Body**34-39  
mm**Priority**

3

**Conservation status**EX CR EN VU NT **LC****Habitat**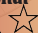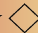

Lake

Pond

Marsh

River

Stream

**Range**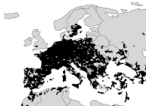

6

Resilience

**Red-Veined Darter***Sympetrum fonscolombii*

3

Size

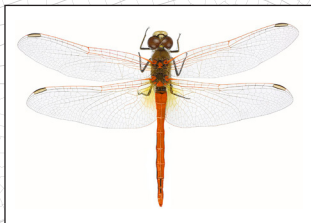

ORDER: Odonata

SUBORDER: Anisoptera

FAMILY: Libellulidae

**Body**33-40  
mm**Priority**

1

**Conservation status**

EX

CR

EN

VU

NT

LC

**Habitat**

Lake

Pond

Marsh

River

Stream

**Range**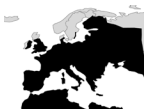

6

Resilience

**Banded Darter***Sympetrum pedemontanum*

3

Size

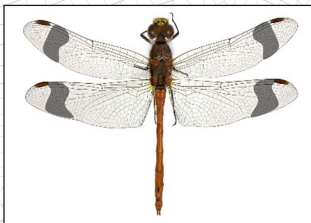

ORDER: Odonata  
 SUBORDER: Anisoptera  
 FAMILY: Libellulidae

**Body**34-39  
mm**Priority**

1

**Conservation status**EX CR EN VU NT **LC****Habitat**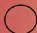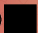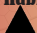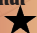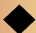

Lake

Pond

Marsh

River

Stream

**Range**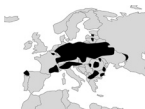

6

Resilience

**Ruddy Darter***Sympetrum sanguineum*

3

Size

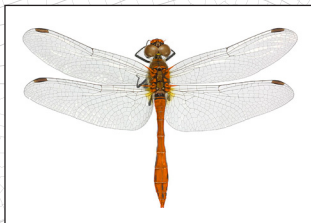

ORDER: Odonata  
 SUBORDER: Anisoptera  
 FAMILY: Libellulidae

**Body**34-39  
mm**Priority**

1

**Conservation status**EX CR EN VU NT **LC****Habitat**

Lake

Pond

Marsh

River

Stream

**Range**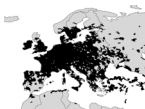

6

Resilience

## Common Darter

*Sympetrum striolatum*

3

Size

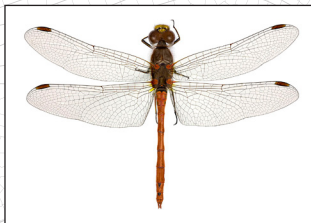

ORDER: Odonata

SUBORDER: Anisoptera

FAMILY: Libellulidae

Body

35-44  
mm

Priority

1

## Conservation status

EX CR EN VU NT LC

## Habitat



Lake

Pond

Marsh

River

Stream

## Range

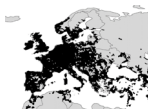

# Disturbance

- 2

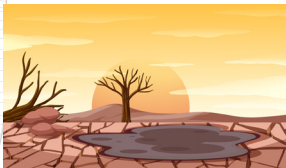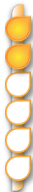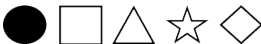

## Drought

### INFO

*Lay it right away. The quality of the habitat indicated below declines by 2. Species with resilience equal or lower than 2 go extinct*

# Disturbance

- 4

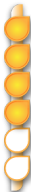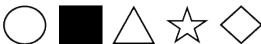

## Drought

### INFO

*Lay it right away. The quality of the habitat indicated below declines by 4. Species with resilience equal or lower than 4 go extinct*

# Disturbance

- 6

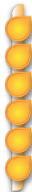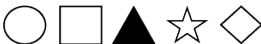

## Drought

### INFO

*Lay it right away. The quality of the habitat indicated below declines by 6. Species with resilience equal or lower than 6 go extinct*

# Disturbance

- 2

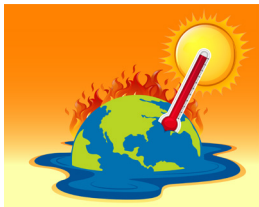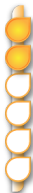

## Warming

### INFO

Lay it right away. The quality of the habitat indicated below declines by 2. Species with resilience equal or lower than 2 go extinct

# Disturbance

- 4

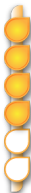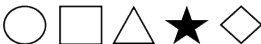

**Warming**

## INFO

*Lay it right away. The quality of the habitat indicated below declines by 4. Species with resilience equal or lower than 4 go extinct*

# Disturbance

- 6

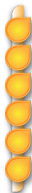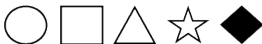

## Warming

### INFO

Lay it right away. The quality of the habitat indicated below declines by 6. Species with resilience equal or lower than 6 go extinct

# Disturbance

- 2

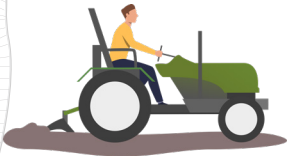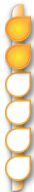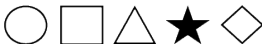

## Habitat Fragmentation

### INFO

*Lay it right away. The quality of the habitat indicated below declines by 2. Species with resilience equal or lower than 2 go extinct*

# Disturbance

- 4

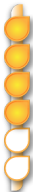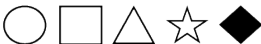

## Habitat Fragmentation

### INFO

*Lay it right away. The quality of the habitat indicated below declines by 4. Species with resilience equal or lower than 4 go extinct*

# Disturbance

- 6

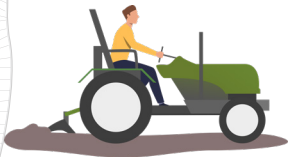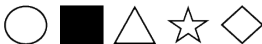

## Habitat Fragmentation

### INFO

Lay it right away. The quality of the habitat indicated below declines by 6. Species with resilience equal or lower than 6 go extinct

# Disturbance

- 2

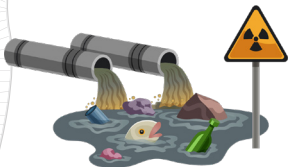

## Pollution

### INFO

*Lay it right away. The quality of the habitat indicated below declines by 2. Species with resilience equal or lower than 2 go extinct*

# Disturbance

- 4

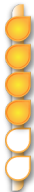

## Pollution

### INFO

Lay it right away. The quality of the habitat indicated below declines by 4. Species with resilience equal or lower than 4 go extinct

# Disturbance

- 6

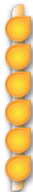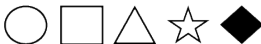

## Pollution

### INFO

*Lay it right away. The quality of the habitat indicated below declines by 6. Species with resilience equal or lower than 6 go extinct*

# Disturbance

- 2

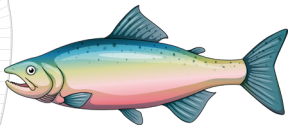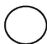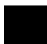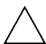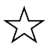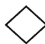

## Invasive fish

### INFO

*Lay it right away. The quality of the habitat indicated below declines by 2. Species with resilience equal or lower than 2 go extinct*

# Disturbance

- 4

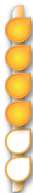

## Invasive fish

### INFO

*Lay it right away. The quality of the habitat indicated below declines by 4. Species with resilience equal or lower than 4 go extinct*

# Disturbance

- 6

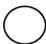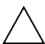

## Invasive fish

### INFO

*Lay it right away. The quality of the habitat indicated below declines by 6. Species with resilience equal or lower than 6 go extinct*

# Disturbance

- 2

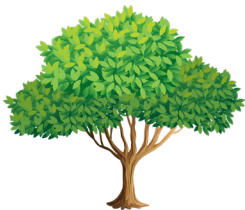

**Invasive tree**

## INFO

*Lay it right away. The quality of the habitat indicated below declines by 2. Species with resilience equal or lower than 2 go extinct*

# Disturbance

- 4

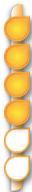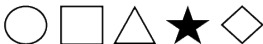

**Invasive tree**

## INFO

*Lay it right away. The quality of the habitat indicated below declines by 4. Species with resilience equal or lower than 4 go extinct*

# Disturbance

- 6



**Invasive tree**

## INFO

*Lay it right away. The quality of the habitat indicated below declines by 6. Species with resilience equal or lower than 6 go extinct*

# Conservation

5

European mink

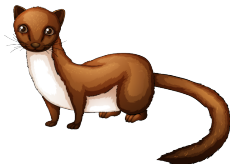

**Umbrella species**

## INFO

*Stops habitat fragmentation and pollution for 5 draws*

# Conservation

4

Aquatic Warbler

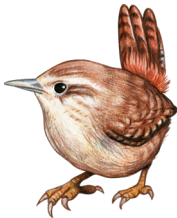

**Umbrella species**

## INFO

*Stops habitat fragmentation and pollution for 4 draws*

# Conservation

3

Fire Salamander

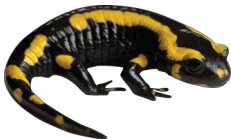

**Umbrella species**

## INFO

*Stops habitat fragmentation and pollution for 3 draws*

# Conservation

5

Brown Bear

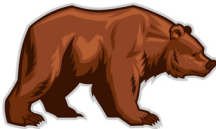

**Umbrella species**

## INFO

*Stops habitat fragmentation and pollution for 5 draws*

# Conservation

4

Red-Breasted Goose

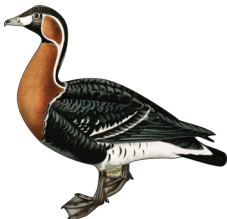

**Umbrella species**

## INFO

*Stops habitat fragmentation and pollution for 4 draws*

# Conservation

3

## European Pond Turtle

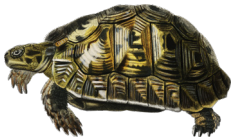

### Umbrella species

#### INFO

*Stops habitat fragmentation and pollution for 3 draws*

# Conservation

6

Ultimate Restoration

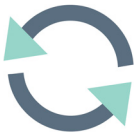

## Habitat Restoration

### INFO

*Restore a habitat from any severe disturbance. This card can be played only after a disturbance occurs*

# Conservation

4

Strong Restoration



## Habitat Restoration

### INFO

*Restore a habitat from a strong disturbance. This card can be played only after a disturbance occurs*

# Conservation

2

Moderate Restoration

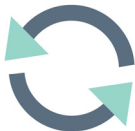

## Habitat Restoration

### INFO

*Restore a habitat from a mild disturbance. This card can be played only after a disturbance occurs*

*Conservation*

All

IUCN

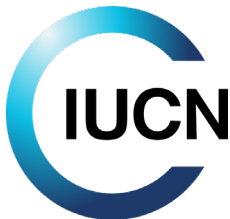

## Habitat Protection

### INFO

*Restore a habitat from any disturbance of any severity. This card can be played before a disturbance occurs for prevention*

*Conservation*

All

Ramsar

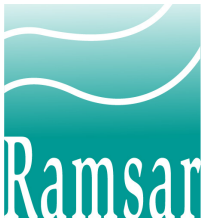

**Habitat Protection**

**INFO**

*Restore a habitat from any disturbance of any severity. This card can be played before a disturbance occurs for prevention*

*Conservation*

All

WWF

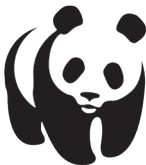

**WWF**

## **Habitat Protection**

### **INFO**

*Restore a habitat from any disturbance of any severity. This card can be played before a disturbance occurs for prevention*

# Conservation

All

Wildlife Conservation Society

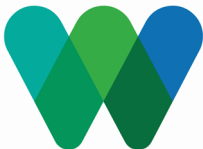

## WCS

### Habitat Protection

#### INFO

*Restore a habitat from any disturbance of any severity. This card can be played before a disturbance occurs for prevention*

# Conservation

All

Conservation International

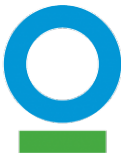

CONSERVATION  
INTERNATIONAL

## Habitat Protection

### INFO

*Restore a habitat from any disturbance of any severity. This card can be played before a disturbance occurs for prevention*

# Conservation

All

Nature Conservancy

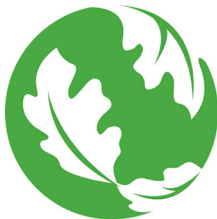

## Habitat Protection

### INFO

*Restore a habitat from any disturbance of any severity. This card can be played before a disturbance occurs for prevention*

# Conservation

24

Large Wetland

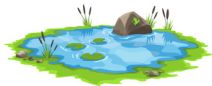

**Artificial Site**

## INFO

*Add a new habitat with a carrying capacity of 24  
(cumulative size index)*

# Conservation

18

Medium-sized Wetland



## Artificial Site

### INFO

*Add a new habitat with a carrying capacity of 12  
(cumulative size index)*

# Conservation

12

Small Wetland

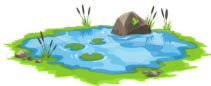

**Artificial Site**

## INFO

*Add a new habitat with a carrying capacity of 12  
(cumulative size index)*

# Conservation

All

All species

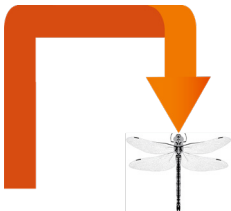

## Reintroduction

### INFO

*Reintroduce a species of any size*

# Conservation

4

Small to Medium size



## Reintroduction

### INFO

*Reintroduce a species of a maximum size index 4*

# Conservation

2

Small size



## Reintroduction

### INFO

*Reintroduce a species of a maximum size index 2*

# Ecology

1

Weather

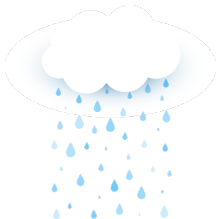

**Rain**

## INFO

*Freeze the player for 1 round. When you play this card, you play and draw one extra time*

# Ecology

1

Weather

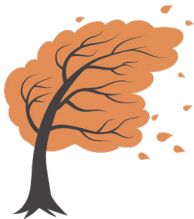

**Wind**

## INFO

*Freeze the player for 1 round. When you play this card, you play and draw one extra time*

# Ecology

2

Weather

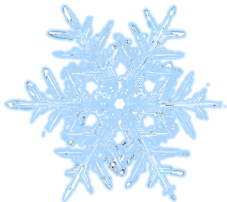

## Frost

### INFO

*Freeze the player for 2 round. When you play this card, you play and draw two extra times*

# Ecology

+1

Food

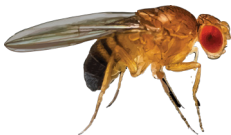

## Fruit Fly

### INFO

*Increase resilience by 1. When you play the card, leave it below the species card so the opponent sees that the species has increased resilience*

# Ecology

+2

Food

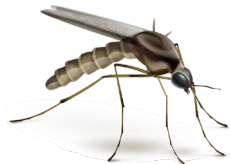

## Mosquito

### INFO

*Increase resilience by 2. When you play the card, leave it below the species card so the opponent sees that the species has increased resilience*

# Ecology

+3

Food

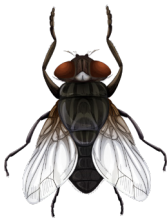

## Horse Fly

### INFO

*Increase resilience by 3. When you play the card, leave it below the species card so the opponent sees that the species has increased resilience*

# Ecology

2

Predation

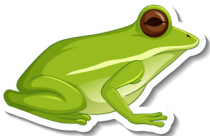

**Frog**

## INFO

*Eat a species of a maximum size index of 2*

# Ecology

4

Predation

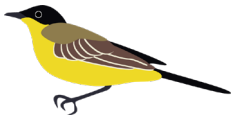

**Passerine**

## INFO

*Eat a species of a maximum size index of 4*

# Ecology

5

Predation

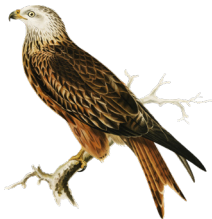

**Hawk**

## INFO

*Eat a species of a minimum size index of 5*

# Ecology

2

## Competition

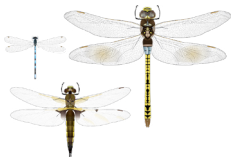

### Interspecific Competition

#### INFO

*Exclude a species of a maximum size score of 6. You need to have a species of at least an equal size to exclude it.*

# Ecology

4

## Competition



## Interspecific Competition

### INFO

*Exclude a species of a maximum size score of 4. You need to have a species of at least an equal size to exclude it.*

# Ecology

6

## Competition



## Interspecific Competition

### INFO

*Exclude a species of a maximum size score of 6. You need to have a species of at least an equal size to exclude it.*

# Ecology

-1

Severe

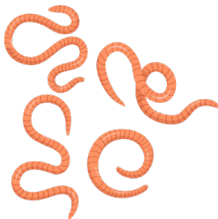

## Parasitism

### INFO

*Reduce environmental sensitivity by 1 point. Leave the card below the species card so the opponent sees that the species has lower resilience*

# Ecology

-2

Severe



## Parasitism

### INFO

*Reduce environmental sensitivity by 2 points. Leave the card below the species card so the opponent sees that the species has lower resilience*

# Ecology

-3

Severe



## Parasitism

### INFO

*Reduce environmental sensitivity by 3 points. Leave the card below the species card so the opponent sees that the species has lower resilience*

# Ecology

+

Positive interaction

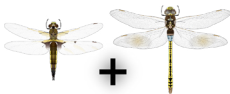

## Mutualism

### INFO

*Increase resilience of all species in the same habitat by a number equal to the number of families. If all species belong to one family, resilience increases by 1. Leave the card in the habitat to keep track of species resilience*

# Ecology

+

Positive interaction



## Mutualism

### INFO

*Increase resilience of all species in the same habitat by a number equal to the number of families. If all species belong to one family, resilience increases by 1. Leave the card in the habitat to keep track of species resilience*

# Ecology

+

Positive interaction



## Mutualism

### INFO

*Increase resilience of all species in the same habitat by a number equal to the number of families. If all species belong to one family, resilience increases by 1. Leave the card in the habitat to keep track of species resilience*

# Ecology

2

## Predation

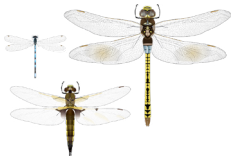

## Intraguild predation

### INFO

*Eat a species of a maximum 2 size index in the same territory with a larger size index species*

# Ecology

4

## Predation



## Intraguild predation

### INFO

*Eat a species of a maximum 4 size index in the same territory with a larger size index species*

# Ecology

6

## Predation

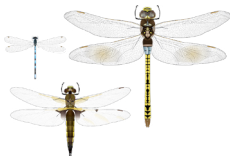

## Intraguild predation

### INFO

*Eat a species of a maximum 6 size index in the same territory with a larger size index species*

# Process

All

Life cycle

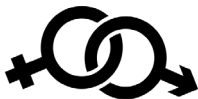

## Mating

### INFO

*Select a species of any size to mate. After mating, the species needs to lay eggs, develop into a larva, then metamorphose into an adult.*

# Process

All

Life cycle



## Mating

### INFO

*Select a species of any size to mate. After mating, the species needs to lay eggs, develop into a larva, then metamorphose into an adult.*

# Process

All

Life cycle

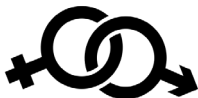

## Mating

### INFO

*Select a species of any size to mate. After mating, the species needs to lay eggs, develop into a larva, then metamorphose into an adult.*

# Process

All

Life cycle

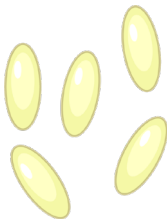

## Egg

### INFO

*Select a species of any size to lay eggs*

# Process

All

Life cycle



## Egg

### INFO

*Select a species of any size to lay eggs*

# Process

All

Life cycle



## Egg

### INFO

*Select a species of any size to lay eggs*

# Process

All

Life cycle

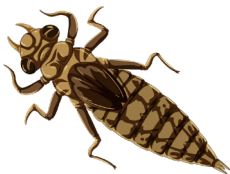

## Larva

### INFO

*Develop the egg into a larva. Must be played on an egg. Select a species of any size*

# Process

All

Life cycle



## Larva

### INFO

*Develop the egg into a larva. Must be played on an egg. Select a species of any size*

# Process

All

Life cycle



## Larva

### INFO

*Develop the egg into a larva. Must be played on an egg. Select a species of any size*

# Process

All

Life cycle

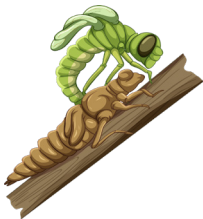

## Metamorphosis

### INFO

*Metamorphose a larva of a species of any size into an adult (this duplicates the species selected)*

# Process

All

Life cycle



## Metamorphosis

### INFO

*Metamorphose a larva of a species of any size into an adult (this duplicates the species selected)*

# Process

All

Life cycle



## Metamorphosis

### INFO

*Metamorphose a larva of a species of any size into an adult (this duplicates the species selected)*

# Process

+5

Evolutionary

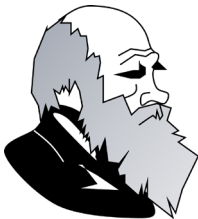

## Adaptation

### INFO

*Increases resilience of a species by 5. The card could also be used to occupy an unpreferred habitat*

# Process

+3

Evolutionary

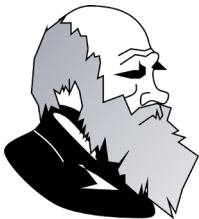

## Adaptation

### INFO

*Increases resilience of a species by 3. The card could also be used to occupy an unpreferred habitat*

# Process

+2

Evolutionary



## Adaptation

### INFO

*Increases resilience of a species by 2. The card could also be used to occupy an unpreferred habitat*

# Process

×3

Ecological

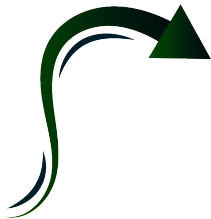

## Dispersal

### INFO

*Move up to 3 species living in the same habitat to a new habitat. Can be used to escape a biotic factor or environmental disturbance*

# Process

×2

Ecological

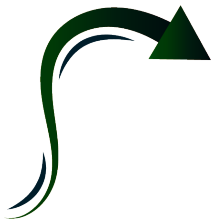

## Dispersal

### INFO

*Move up to 2 species living in the same habitat to a new habitat. Can be used to escape a biotic factor or environmental disturbance*

# Process

x1

Ecological



## Dispersal

### INFO

*Move one species to a new habitat. Can be used to escape a biotic factor or environmental disturbance*

**Bonus**

$\leq 6$

Expert odonatologist

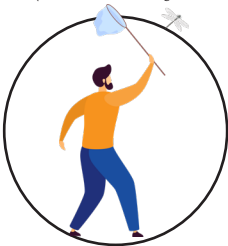

**Netting**

**INFO**

*Steal a species from the opponent of any size index*

**Bonus**

$\leq 4$

Student

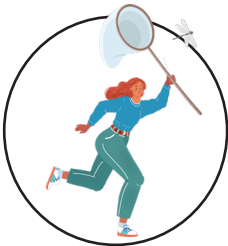

**Netting**

**INFO**

*Steal a species from the opponent of a maximum size score 4*

# Bonus

$\leq 2$

Community scientist

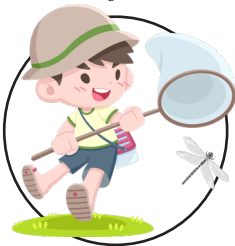

## Netting

### INFO

*Steal a species from the opponent of a maximum size index 2*

# Bonus

## Fossil dragonfly

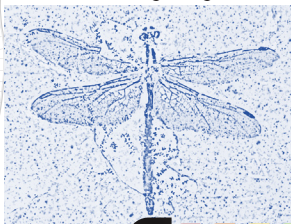

EX

CR

EN

VU

NT

LC

## Cephalozygoptera

### INFO

Reintroduce two dragonfly cards, draw two cards of any kind, and play two cards at once

# Bonus

## Fossil dragonfly

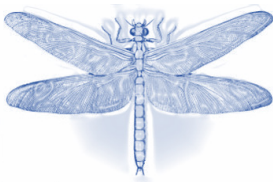

EX

CR

EN

VU

NT

LC

## Meganeura

### INFO

Reintroduce two dragonfly cards, draw two cards of any kind, and play two cards at once
